# Supplementary material for: Tetrachlorocatecholates of triarylarsines as a novel class of Lewis acids
Source: Royal Society of Chemistry journal article supplement (doi:10.1039/d2dt02145e), 2022-01-01
Supplement: d2dt02145e1.pdf [file d2dt02145e1.pdf]

## Supporting Information

# **Tetrachlorocatecholates of tertiary arsines as a novel class of Lewis acids**

Akane Chishiro,<sup>[a]</sup> Ippei Akioka,<sup>[a]</sup> Akifumi Sumida,<sup>[a]</sup> Kouki Oka,<sup>[b]</sup> Norimitsu Tohnai,<sup>[b]</sup>  
Takashi Yumura,<sup>[c]</sup> Hiroaki Imoto,<sup>\*[a]</sup> and Kensuke Naka<sup>\*[a,d]</sup>

[a] Faculty of Molecular Chemistry and Engineering, Graduate School of Science and Technology, Kyoto Institute of Technology, Goshokaido-cho, Matsugasaki, Sakyo-ku, Kyoto 606-8585, Japan. E-mail: himoto@kit.ac.jp (HI); kenaka@kit.ac.jp (KN).

[b] Center for Future Innovation (CFi) and Department of Applied Chemistry, Graduate School of Engineering, Osaka University, 2-1 Yamadaoka, Suita, Osaka, 565-0871, Japan.

[c] Faculty of Material Science and Technology, Graduate School of Science and Technology, Kyoto Institute of Technology, Goshokaido-cho, Matsugasaki, Sakyo-ku, Kyoto 606-8585, Japan.

[d] Materials Innovation Lab, Kyoto Institute of Technology, Goshokaido-cho, Matsugasaki, Sakyo-ku, Kyoto 606-8585, Japan.

### **Contents:**

- 1. NMR Spectra**
- 2. X-ray crystallographic data for single crystalline products**
- 3. UV-vis absorption spectra and CV data**
- 4. Determination of stoichiometry by Job plots**
- 5. Determination of association constants**
- 6. Lewis acid-catalyzed bromination**
- 7. Computational calculations**

## 1. NMR spectra

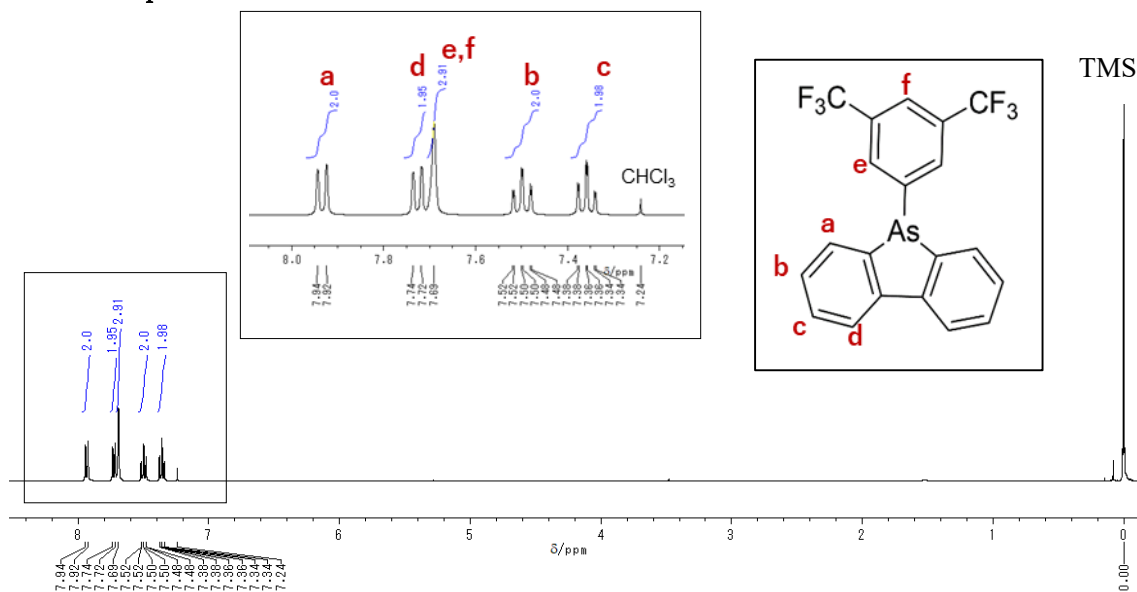

Figure S1.  $^1\text{H-NMR}$  (400 MHz) spectrum for **5'** in  $\text{CDCl}_3$ .

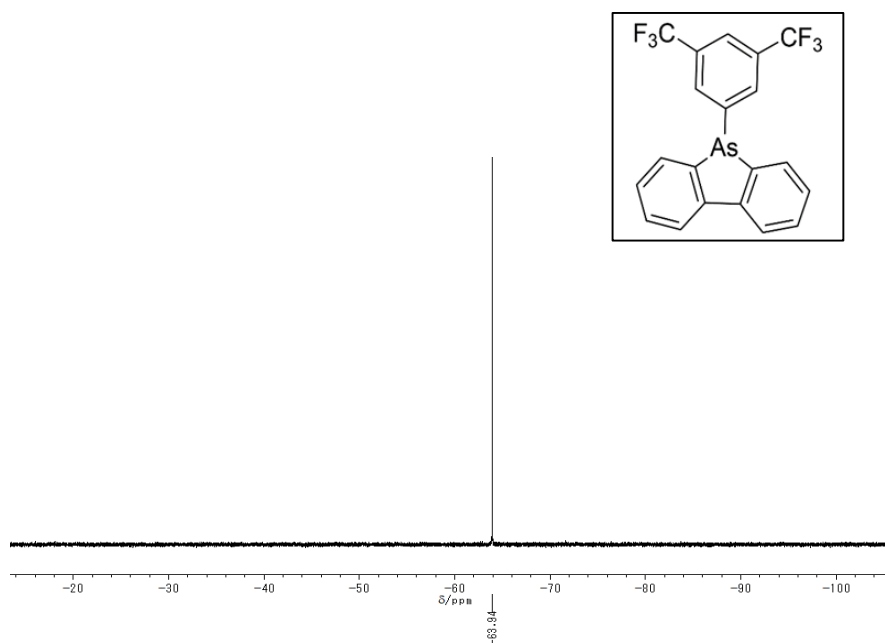

Figure S2.  $^{19}\text{F-NMR}$  (376 MHz) spectrum for **5'** in  $\text{CDCl}_3$ .

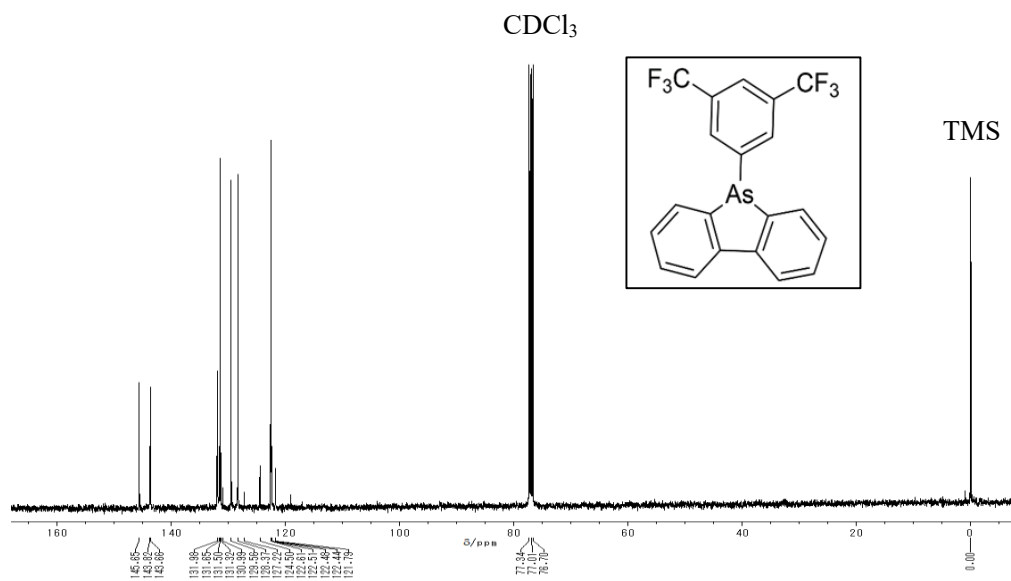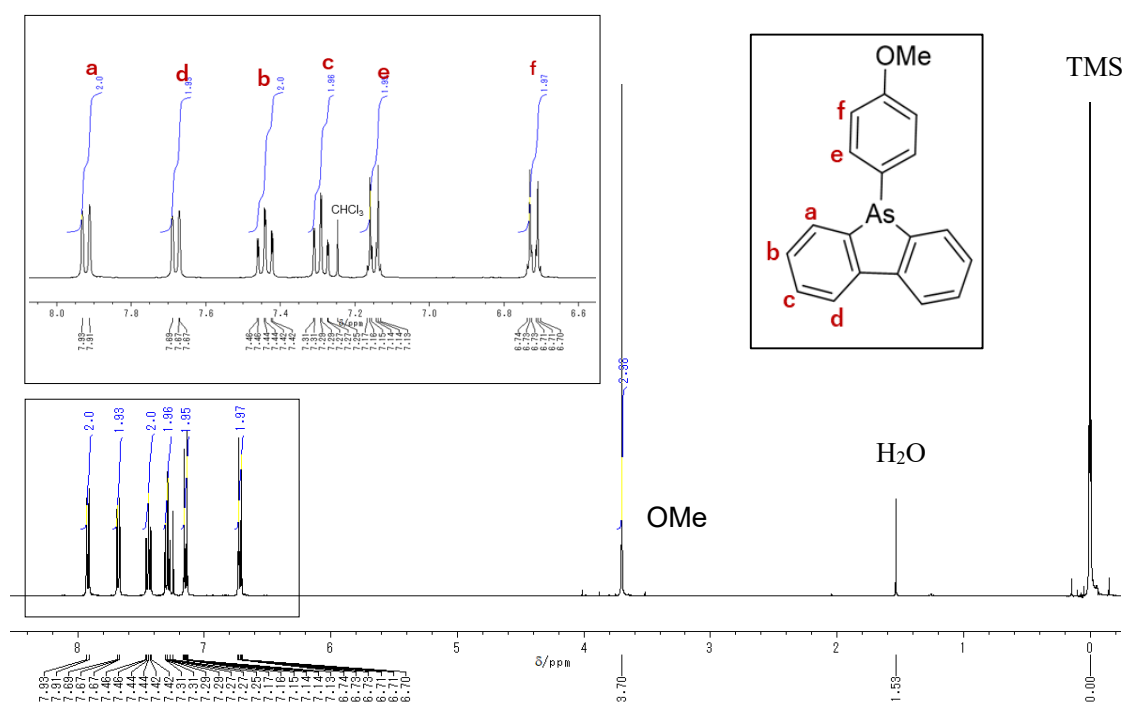

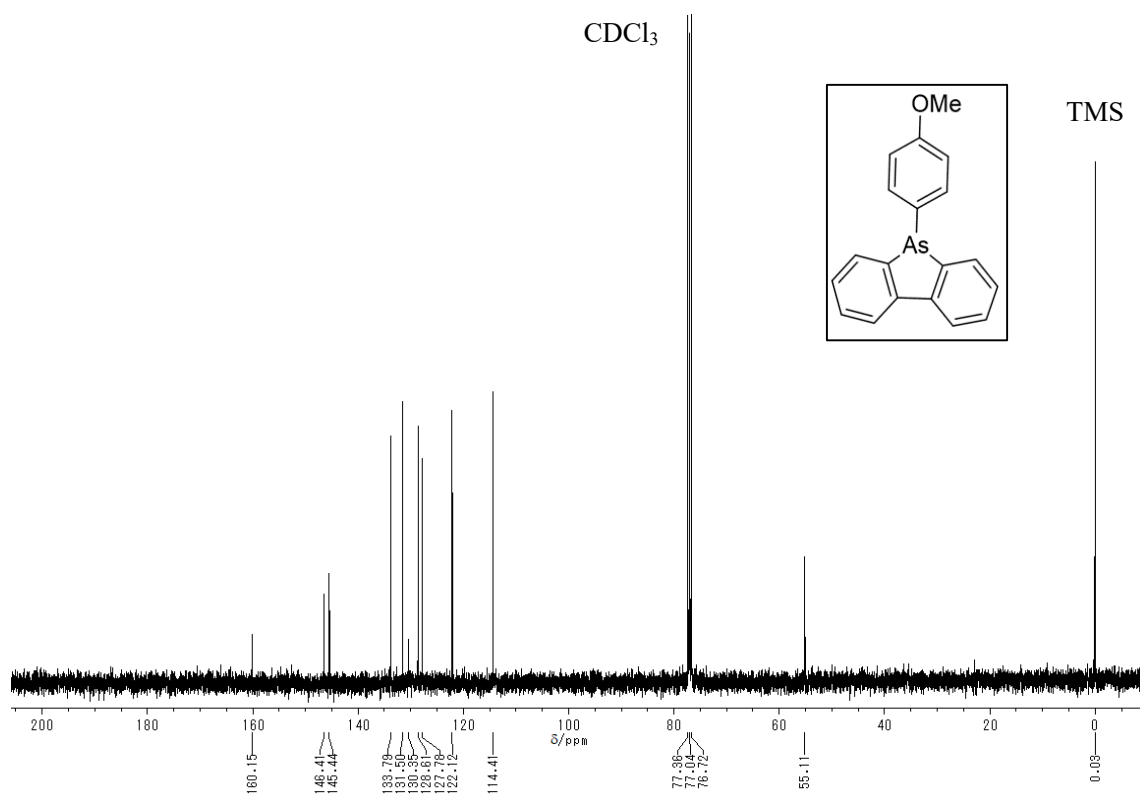

**Figure S5.**  $^{13}\text{C}$ -NMR (100 MHz) spectrum for **7'** in  $\text{CDCl}_3$ .

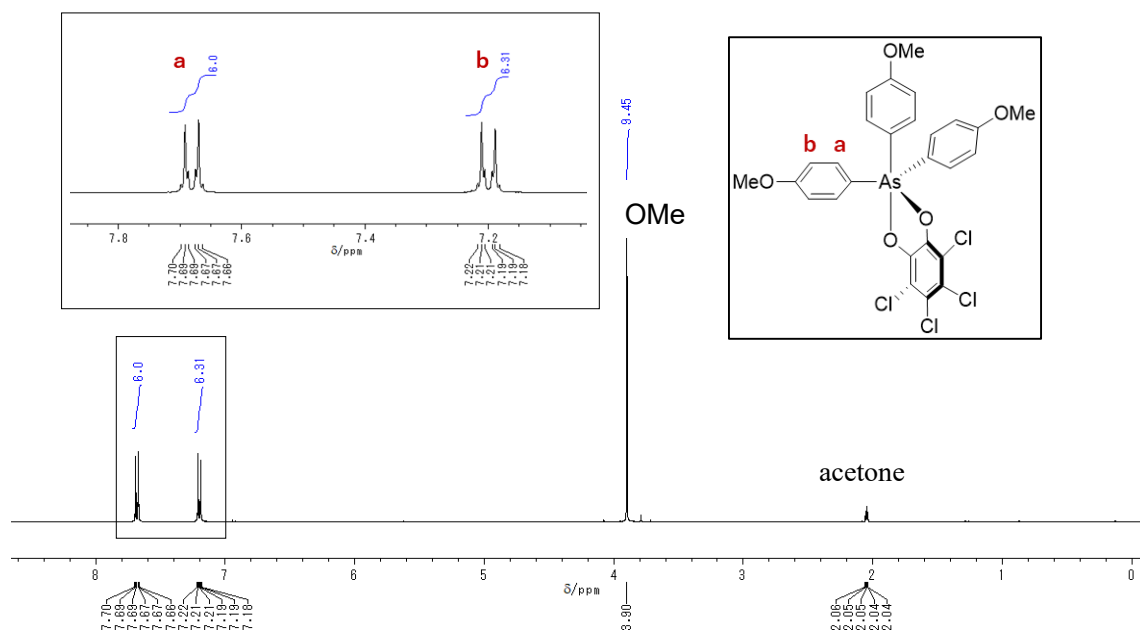

**Figure S6.**  $^1\text{H}$ -NMR (400 MHz) spectrum for **3** in  $\text{acetone-}d_6$ .

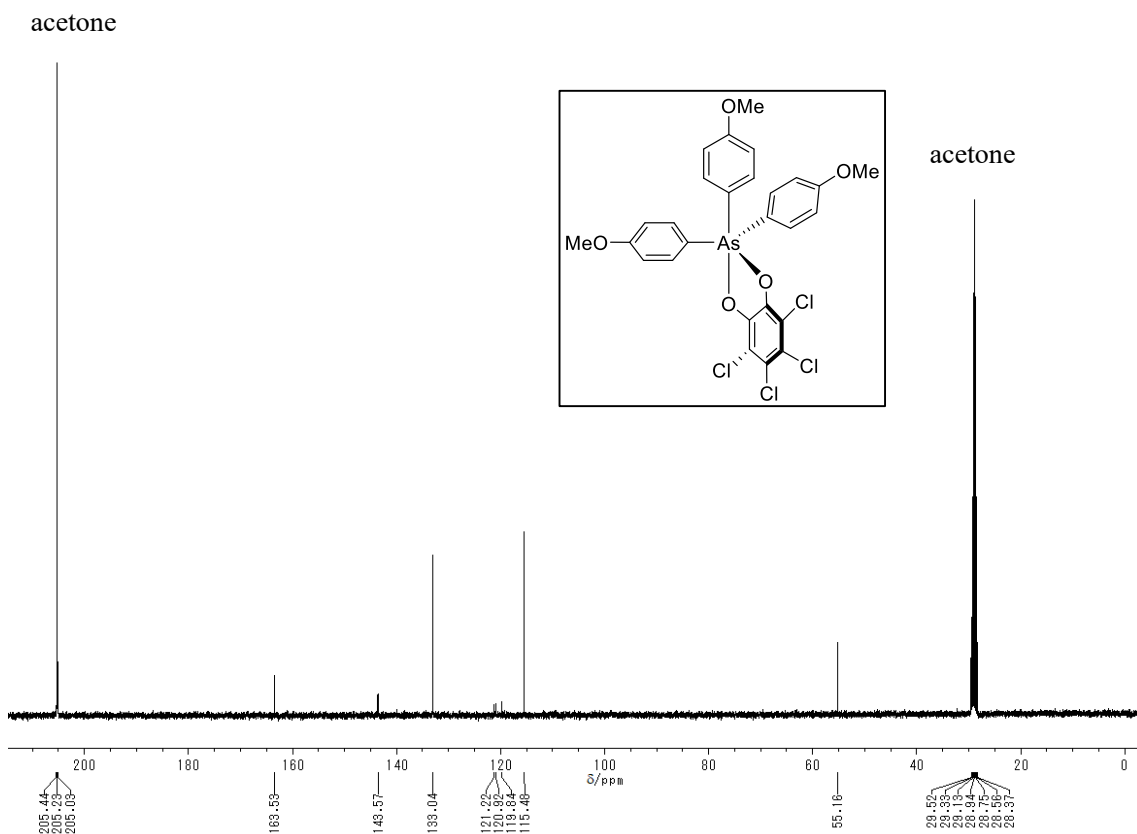

Figure S7.  $^{13}\text{C}$ -NMR (100 MHz) spectrum for **3** in acetone- $d_6$ .

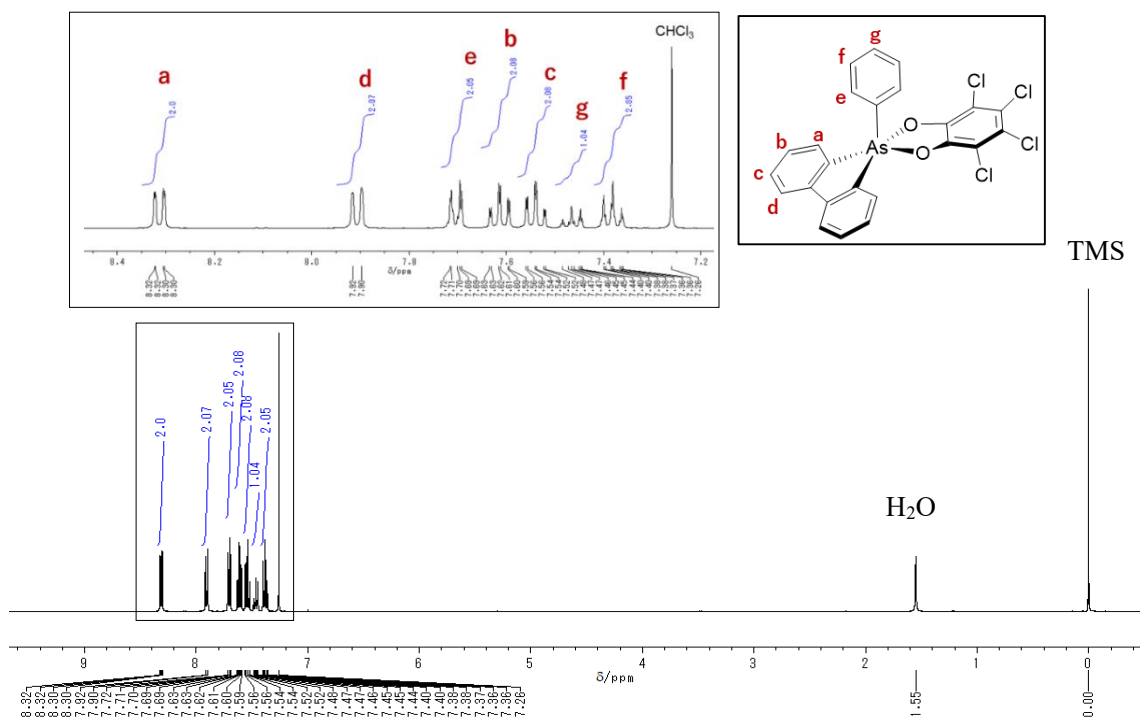

Figure S8.  $^1\text{H}$ -NMR (400 MHz) spectrum for **4** in  $\text{CDCl}_3$ .

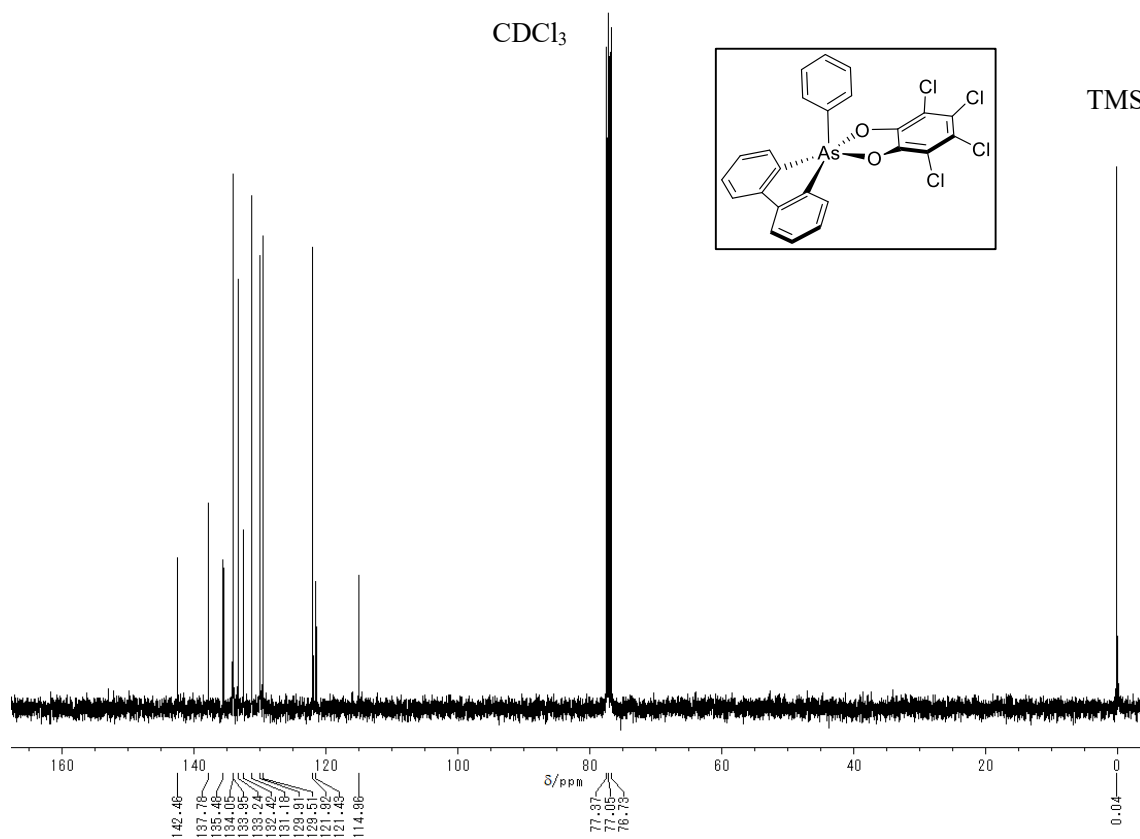

Figure S9. <sup>13</sup>C-NMR (100 MHz) spectrum for **4** in CDCl<sub>3</sub>.

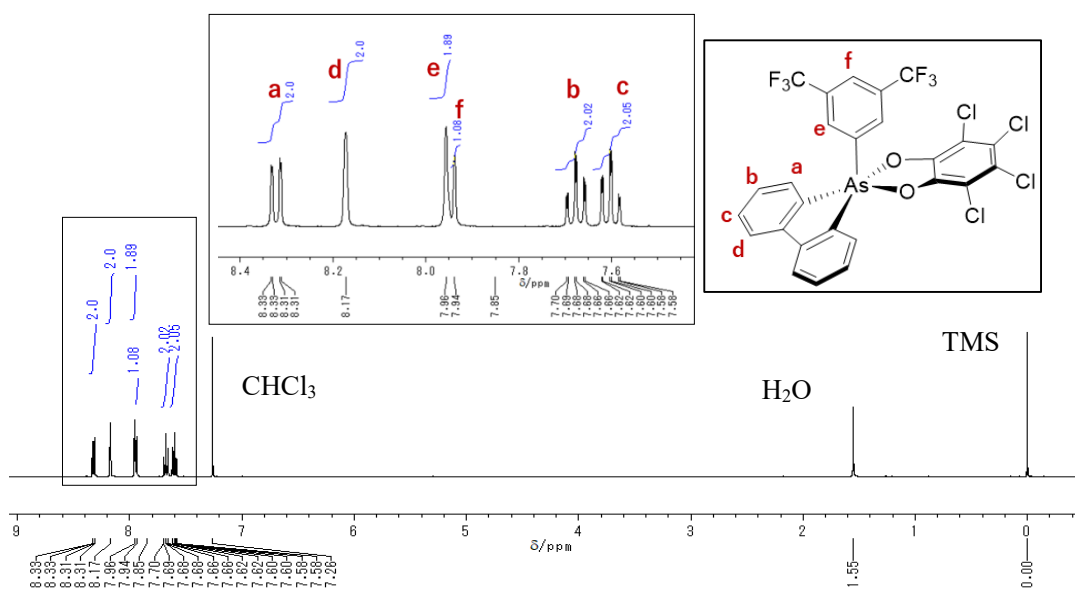

Figure S10. <sup>1</sup>H-NMR (400 MHz) spectrum for **5** in CDCl<sub>3</sub>.

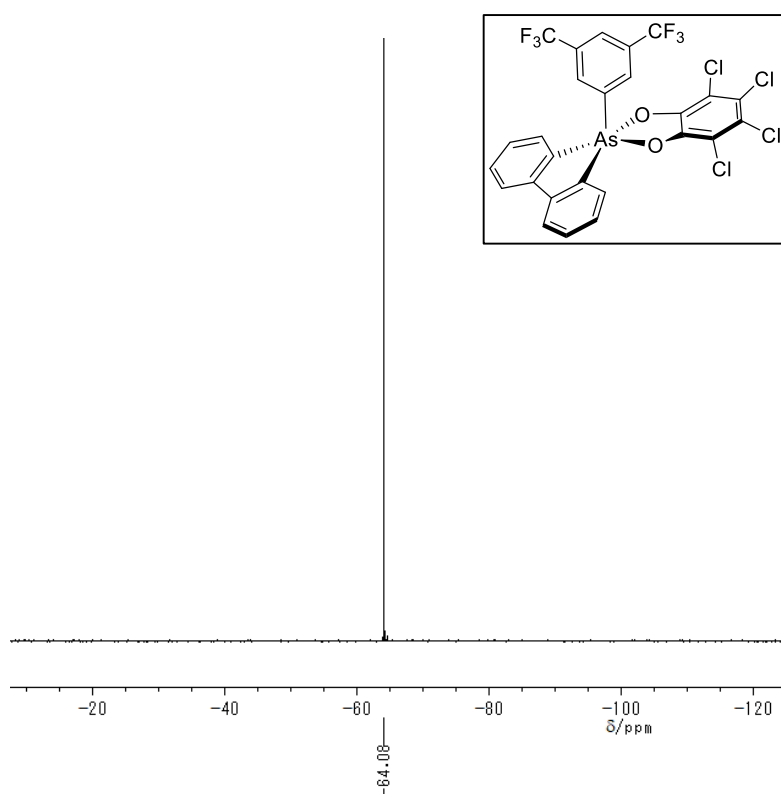

**Figure S11.**  $^{19}\text{F}$ -NMR (376 MHz) spectrum for **5** in  $\text{CDCl}_3$ .

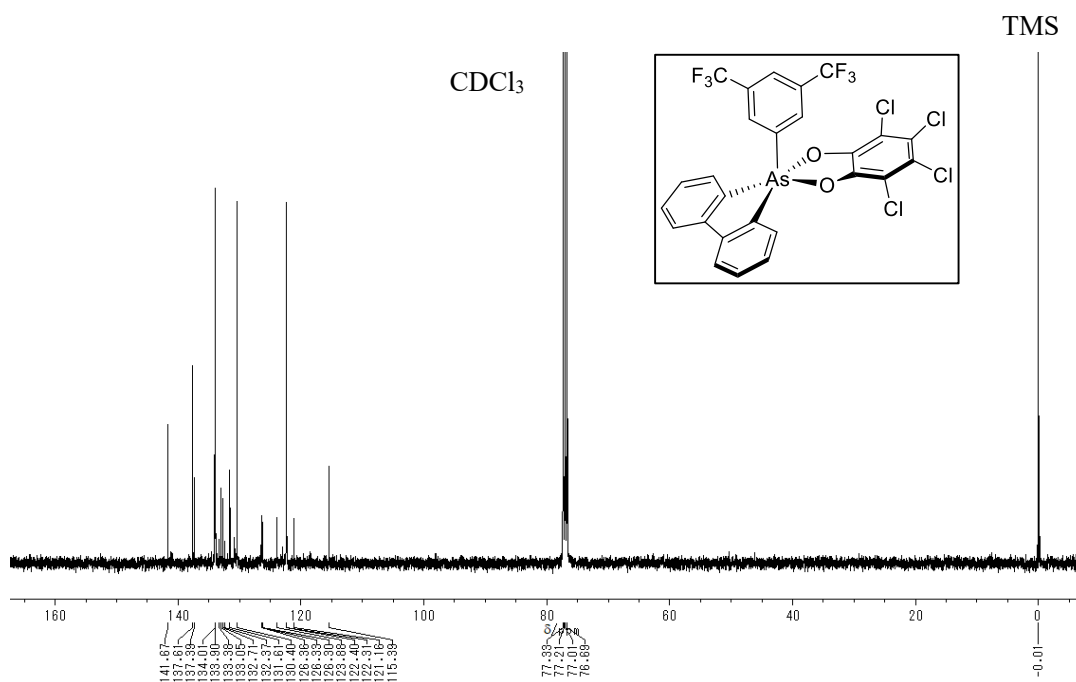

**Figure S12.**  $^{13}\text{C}$ -NMR (100 MHz) spectrum for **5** in  $\text{CDCl}_3$ .

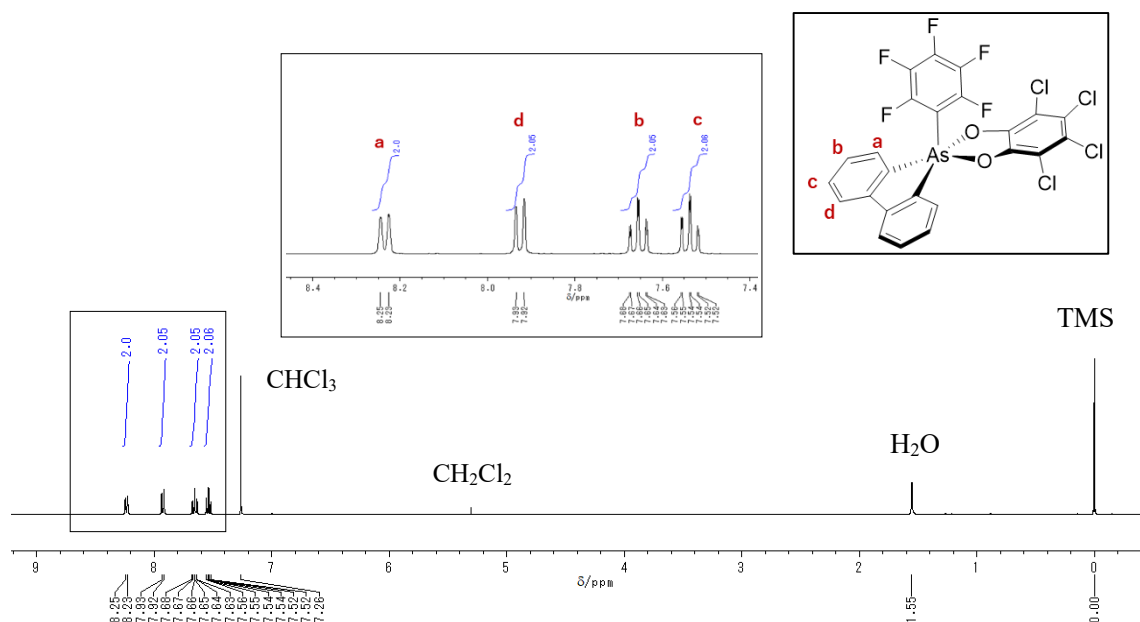

Figure S13.  $^1\text{H-NMR}$  (400 MHz) spectrum for **6** in  $\text{CDCl}_3$ .

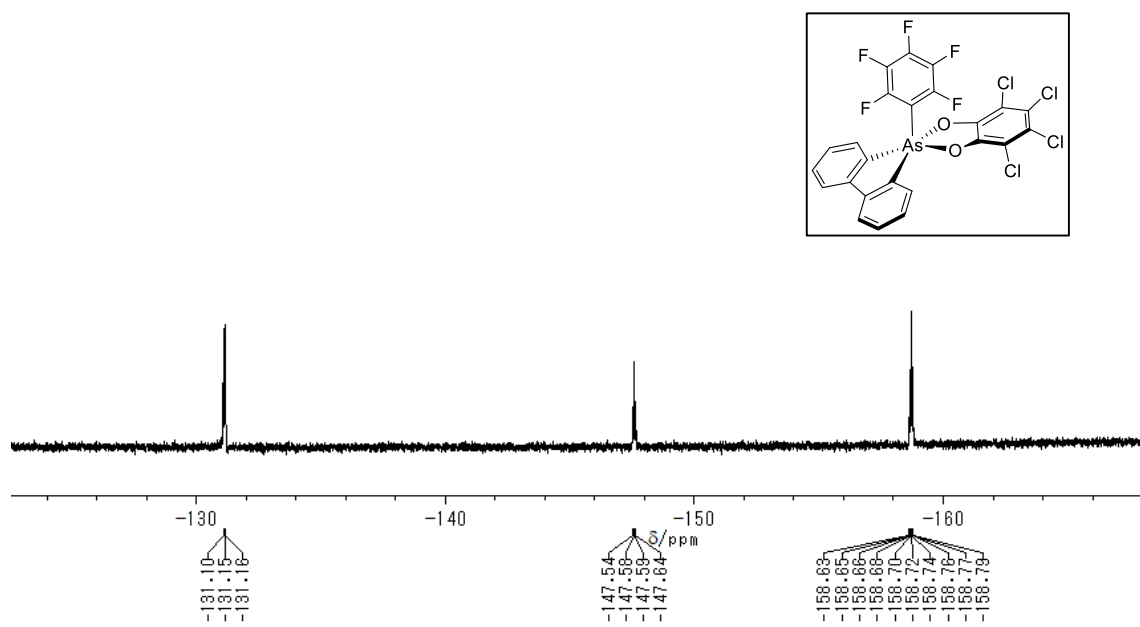

Figure S14.  $^{19}\text{F-NMR}$  (376 MHz) spectrum for **6** in  $\text{CDCl}_3$ .



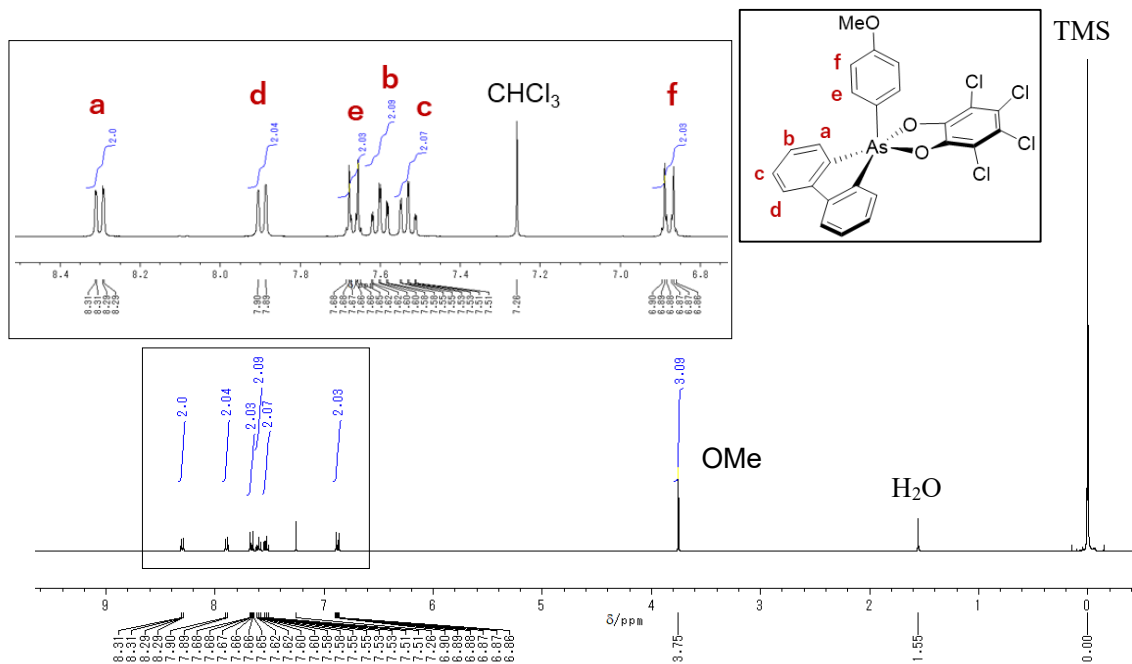

**Figure S15.**  $^1\text{H-NMR}$  (400 MHz) spectrum for **7** in  $\text{CDCl}_3$ .

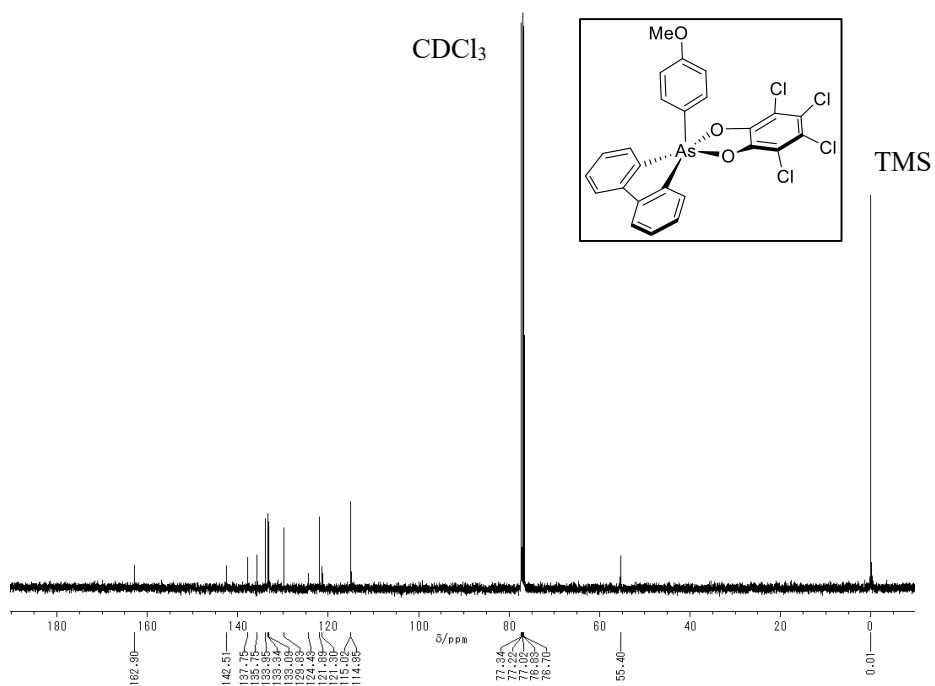

**Figure S16.**  $^{13}\text{C-NMR}$  (100 MHz) spectrum for **7** in  $\text{CDCl}_3$ .

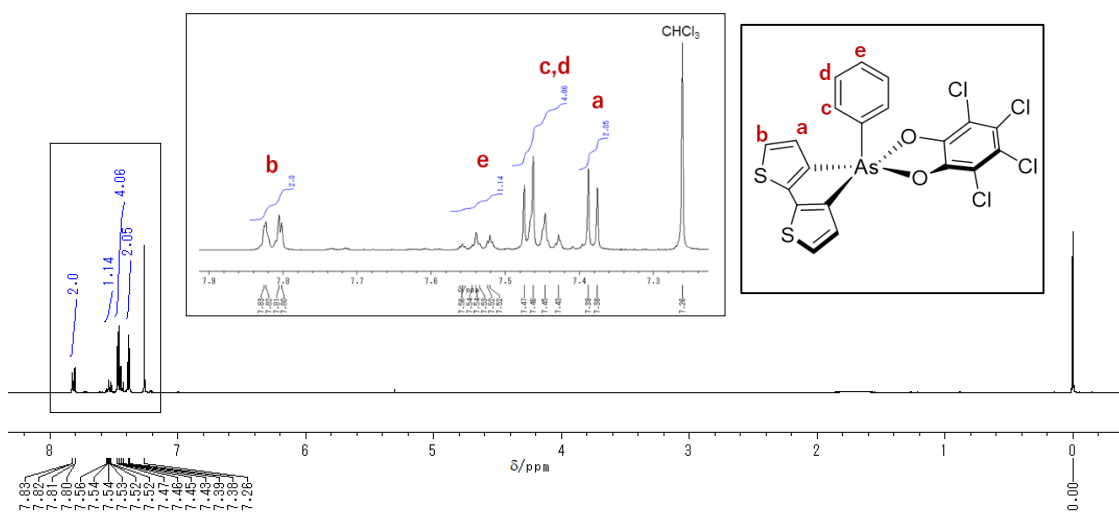

Figure S17.  $^1\text{H-NMR}$  (400 MHz) spectrum for **8** in  $\text{CDCl}_3$ .

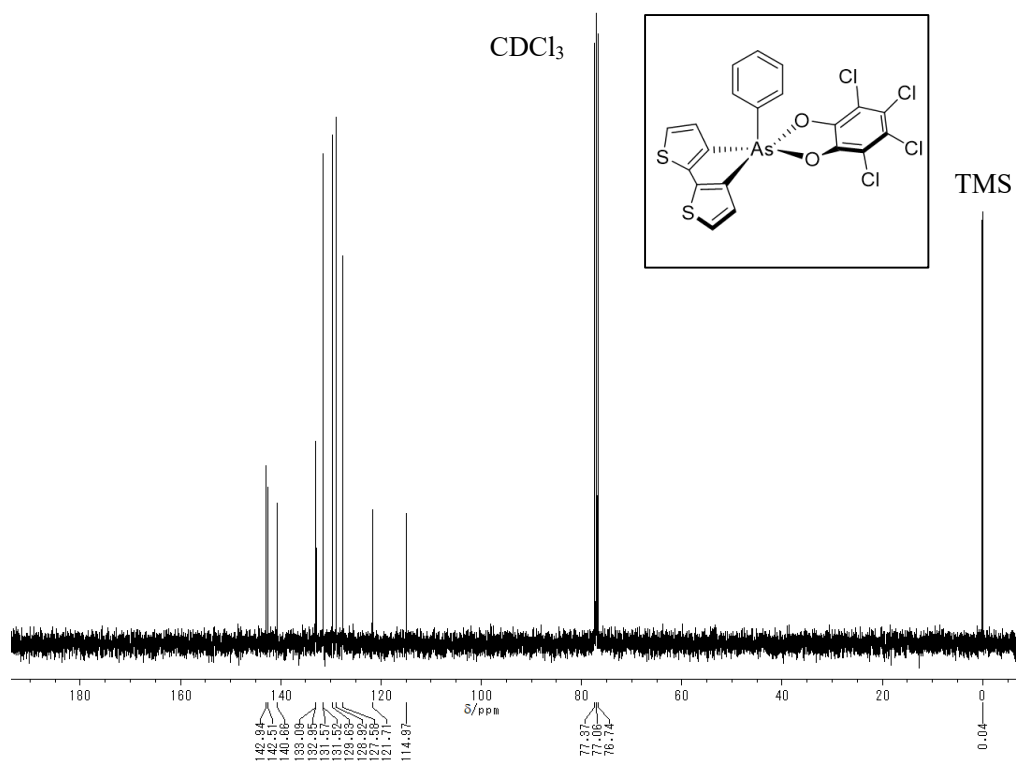

Figure S18.  $^{13}\text{C-NMR}$  (100 MHz) spectrum for **8** in  $\text{CDCl}_3$ .

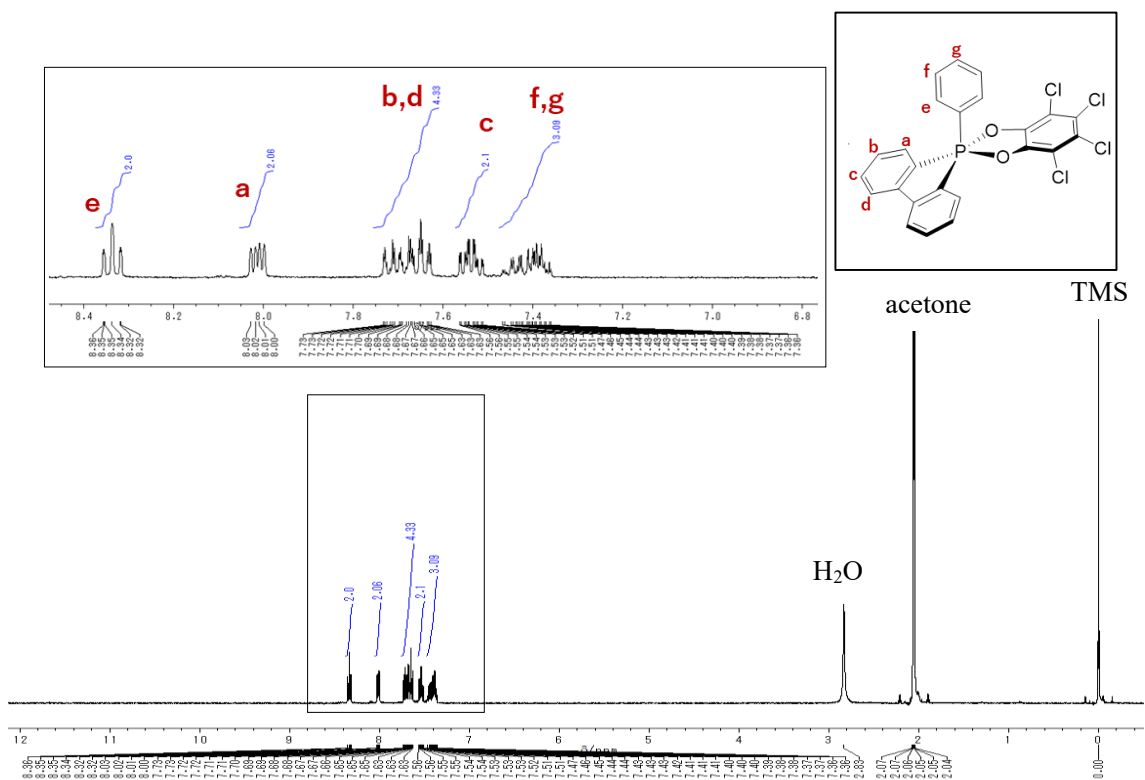

**Figure S19.**  $^1\text{H-NMR}$  (400 MHz) spectrum for **11** in  $\text{acetone-}d_6$ .

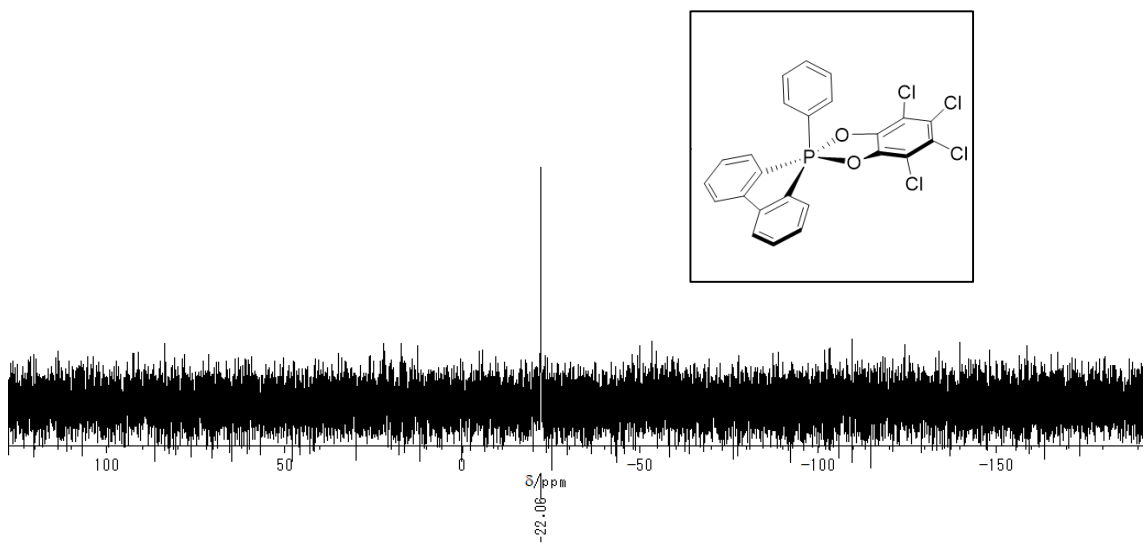

**Figure S20.**  $^{31}\text{P-NMR}$  (162 MHz) spectrum for **11** in  $\text{acetone-}d_6$ .

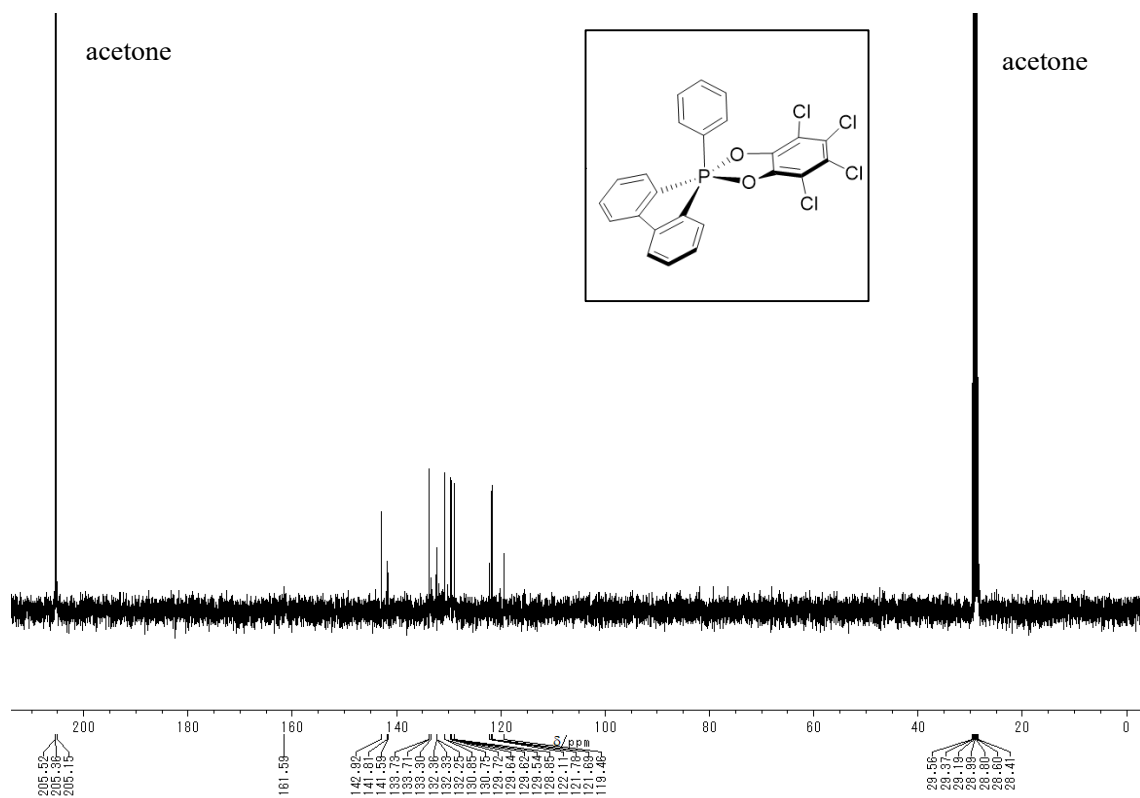

Figure S21.  $^{13}\text{C}$ -NMR (100 MHz) spectrum for **11** in acetone- $d_6$ .

## 2. Crystallographic data

**Table S1.** Crystallographic data of **1**, **2**, and **3**.

|                                         | <b>1</b>                                                         | <b>2</b>                                                                        | <b>3</b>                                                                        |
|-----------------------------------------|------------------------------------------------------------------|---------------------------------------------------------------------------------|---------------------------------------------------------------------------------|
| Crystal data                            |                                                                  |                                                                                 |                                                                                 |
| Empirical Formula                       | C <sub>24</sub> H <sub>15</sub> AsCl <sub>4</sub> O <sub>2</sub> | C <sub>30</sub> H <sub>9</sub> AsCl <sub>4</sub> F <sub>18</sub> O <sub>2</sub> | C <sub>54</sub> H <sub>42</sub> As <sub>2</sub> Cl <sub>8</sub> O <sub>10</sub> |
| Formula Weight                          | 552.08                                                           | 960.09                                                                          | 1284.31                                                                         |
| Crystal Dimension, mm <sup>3</sup>      | 0.91 × 0.53 × 0.25                                               | 0.45 × 0.35 × 0.31                                                              | 0.687 × 0.393 × 0.27                                                            |
| Crystal System                          | triclinic                                                        | monoclinic                                                                      | triclinic                                                                       |
| Space Group                             | <i>P</i> -1                                                      | <i>P</i> 2 <sub>1</sub> / <i>n</i>                                              | <i>P</i> -1                                                                     |
| a, Å                                    | 9.4381(7)                                                        | 10.6976(4)                                                                      | 10.0471(3)                                                                      |
| b, Å                                    | 10.9659(8)                                                       | 23.821(1)                                                                       | 12.8490(5)                                                                      |
| c, Å                                    | 11.5914(6)                                                       | 13.1719(6)                                                                      | 21.2792(7)                                                                      |
| α, deg.                                 | 79.380(5)                                                        | -                                                                               | 92.495(3)                                                                       |
| β, deg.                                 | 83.286(5)                                                        | 92.048(4)                                                                       | 97.124(3)                                                                       |
| γ, deg.                                 | 70.007(6)                                                        | -                                                                               | 99.593(3)                                                                       |
| Volume, Å <sup>3</sup>                  | 1106.2(1)                                                        | 3354.5(3)                                                                       | 2681.9(2)                                                                       |
| D <sub>calcd</sub> , g cm <sup>-3</sup> | 1.658                                                            | 1.901                                                                           | 1.590                                                                           |
| Z                                       | 2                                                                | 4                                                                               | 2                                                                               |
| F(000)                                  | 552.0                                                            | 1872.0                                                                          | 1296.0                                                                          |
| Data Collection                         |                                                                  |                                                                                 |                                                                                 |
| Temperature, deg.                       | -180.0                                                           | -180.0                                                                          | -180.0                                                                          |
| 2θmax, deg.                             | 52.744                                                           | 52.746                                                                          | 52.744                                                                          |
| Tmin/Tmax                               | 0.583 / 0.836                                                    | 0.470 / 0.522                                                                   | 0.020 / 0.100                                                                   |
| Refinement                              |                                                                  |                                                                                 |                                                                                 |
| No. of Observed Data                    | 4522                                                             | 6856                                                                            | 10965                                                                           |
| No. of Parameters                       | 280                                                              | 496                                                                             | 673                                                                             |
| R1 <sup>a</sup> , wR2 <sup>b</sup>      | 0.0349, 0.0889                                                   | 0.0533, 0.1442                                                                  | 0.0568, 0.1599                                                                  |
| Goodness of Fit Indicator               | 1.031                                                            | 1.035                                                                           | 1.056                                                                           |

$${}^aR1 = \sum ||F_o| - |F_c|| / \sum |F_o| \quad {}^bwR2 = [ \sum w ((F_o^2 - F_c^2)^2 / \sum w (F_o^2)^2 )^{1/2} \quad w = [ \sigma^2(F_o^2) ]^{-1}$$

CCDC #2156251 (**1**), 2156252 (**2**), 2156253 (**3**)

**Table S2.** Crystallographic data of **4**, **5**, and **6**.

|                                         | <b>4</b>                                                         | <b>5</b>                                                                        | <b>6</b>                                                                       |
|-----------------------------------------|------------------------------------------------------------------|---------------------------------------------------------------------------------|--------------------------------------------------------------------------------|
| Crystal data                            |                                                                  |                                                                                 |                                                                                |
| Empirical Formula                       | C <sub>24</sub> H <sub>13</sub> AsCl <sub>4</sub> O <sub>2</sub> | C <sub>24</sub> H <sub>11</sub> AsCl <sub>4</sub> F <sub>6</sub> O <sub>2</sub> | C <sub>24</sub> H <sub>8</sub> AsCl <sub>4</sub> F <sub>5</sub> O <sub>2</sub> |
| Formula Weight                          | 550.10                                                           | 686.07                                                                          | 640.02                                                                         |
| Crystal Dimension, mm <sup>3</sup>      | 0.17 × 0.10 × 0.05                                               | 0.69 × 0.37 × 0.15                                                              | 0.21 × 0.16 × 0.13                                                             |
| Crystal System                          | triclinic                                                        | triclinic                                                                       | monoclinic                                                                     |
| Space Group                             | <i>P</i> -1                                                      | <i>P</i> -1                                                                     | <i>P</i> <sub>2</sub> / <i>c</i>                                               |
| a, Å                                    | 9.2905(5)                                                        | 8.7605(2)                                                                       | 18.5696(11)                                                                    |
| b, Å                                    | 14.1453(18)                                                      | 9.4518(2)                                                                       | 16.0085(5)                                                                     |
| c, Å                                    | 17.0807(10)                                                      | 16.2259(3)                                                                      | 17.3520(11)                                                                    |
| α, deg.                                 | 86.897(19)                                                       | 105.744(2)                                                                      | -                                                                              |
| β, deg.                                 | 77.83(2)                                                         | 99.000(2)                                                                       | 117.110(8)                                                                     |
| γ, deg.                                 | 79.292(15)                                                       | 99.061(2)                                                                       | -                                                                              |
| Volume, Å <sup>3</sup>                  | 2155.8(4)                                                        | 1248.65(5)                                                                      | 4591.5(5)                                                                      |
| D <sub>calcd</sub> , g cm <sup>-3</sup> | 1.695                                                            | 1.825                                                                           | 1.852                                                                          |
| Z                                       | 4                                                                | 2                                                                               | 8                                                                              |
| F(000)                                  | 1096.0                                                           | 676.0                                                                           | 2512.0                                                                         |
| Data Collection                         |                                                                  |                                                                                 |                                                                                |
| Temperature, deg.                       | -180.0                                                           | -180.0                                                                          | -180.0                                                                         |
| 2θmax, deg.                             | 55.0                                                             | 52.7                                                                            | 53.5                                                                           |
| Tmin/Tmax                               | 0.750 / 0.901                                                    | 0.226 / 0.638                                                                   | 0.407 / 1.000                                                                  |
| Refinement                              |                                                                  |                                                                                 |                                                                                |
| No. of Observed Data                    | 9549                                                             | 5106                                                                            | 9396                                                                           |
| No. of Parameters                       | 559                                                              | 352                                                                             | 650                                                                            |
| R1 <sup>a</sup> , wR2 <sup>b</sup>      | 0.0479, 0.0971                                                   | 0.0258, 0.0670                                                                  | 0.0544, 0.1443                                                                 |
| Goodness of Fit Indicator               | 1.081                                                            | 1.047                                                                           | 0.931                                                                          |

$${}^aR1 = \sum ||F_o| - |F_c|| / \sum |F_o| \quad {}^bwR2 = [ \sum w ((F_o^2 - F_c^2)^2 / \sum w (F_o^2)^2 )^{1/2} \quad w = [ \sigma^2(F_o^2) ]^{-1}$$

CCDC #2156254 (**4**), 2156258 (**5**), 2156257 (**6**)

**Table S3.** Crystallographic data of **7**, **8**, and **9**.

|                                         | <b>7</b>                                                         | <b>8</b>                                                                       | <b>9</b>                                                         |
|-----------------------------------------|------------------------------------------------------------------|--------------------------------------------------------------------------------|------------------------------------------------------------------|
| Crystal data                            |                                                                  |                                                                                |                                                                  |
| Empirical Formula                       | C <sub>25</sub> H <sub>15</sub> AsCl <sub>4</sub> O <sub>3</sub> | C <sub>20</sub> H <sub>9</sub> AsCl <sub>4</sub> O <sub>2</sub> S <sub>2</sub> | C <sub>24</sub> H <sub>15</sub> Cl <sub>4</sub> O <sub>2</sub> P |
| Formula Weight                          | 580.09                                                           | 562.11                                                                         | 508.13                                                           |
| Crystal Dimension, mm <sup>3</sup>      | 0.43 × 0.4 × 0.37                                                | 0.63 × 0.51 × 0.24                                                             | 1 × 0.8 × 0.6                                                    |
| Crystal System                          | monoclinic                                                       | triclinic                                                                      | triclinic                                                        |
| Space Group                             | <i>P</i> 2 <sub>1</sub> / <i>n</i>                               | <i>P</i> -1                                                                    | <i>P</i> -1                                                      |
| a, Å                                    | 8.7641(3)                                                        | 8.8878(5)                                                                      | 8.797(1)                                                         |
| b, Å                                    | 16.2724(6)                                                       | 10.6388(4)                                                                     | 9.0423(9)                                                        |
| c, Å                                    | 15.7928(5)                                                       | 12.0109(5)                                                                     | 16.302(2)                                                        |
| α, deg.                                 | -                                                                | 106.101(3)                                                                     | 74.533(9)                                                        |
| β, deg.                                 | 94.801(3)                                                        | 103.786(4)                                                                     | 86.78(1)                                                         |
| γ, deg.                                 | -                                                                | 98.692(4)                                                                      | 62.57(1)                                                         |
| Volume, Å <sup>3</sup>                  | 2244.4(1)                                                        | 1030.60(9)                                                                     | 1106.0(2)                                                        |
| D <sub>calcd</sub> , g cm <sup>-3</sup> | 1.717                                                            | 1.811                                                                          | 1.526                                                            |
| Z                                       | 4                                                                | 2                                                                              | 2                                                                |
| F(000)                                  | 1160.0                                                           | 556.0                                                                          | 516.0                                                            |
| Data Collection                         |                                                                  |                                                                                |                                                                  |
| Temperature, deg.                       | -180.0                                                           | -180.0                                                                         | 20.0                                                             |
| 2θmax, deg.                             | 52.738                                                           | 52.744                                                                         | 52.744                                                           |
| Tmin/Tmax                               | 0.854 / 0.884                                                    | 0.569 / 0.783                                                                  | 0.261 / 0.504                                                    |
| Refinement                              |                                                                  |                                                                                |                                                                  |
| No. of Observed Data                    | 4569                                                             | 4195                                                                           | 4521                                                             |
| No. of Parameters                       | 300                                                              | 262                                                                            | 280                                                              |
| R1 <sup>a</sup> , wR2 <sup>b</sup>      | 0.0241, 0.0592                                                   | 0.0256, 0.0624                                                                 | 0.0483, 0.1346                                                   |
| Goodness of Fit Indicator               | 1.046                                                            | 1.039                                                                          | 1.066                                                            |

<sup>a</sup>R1 =  $\sum ||F_o| - |F_c| | / \sum |F_o|$     <sup>b</sup>wR2 =  $[\sum w ((F_o^2 - F_c^2)^2 / \sum w (F_o^2)^2)]^{1/2}$     w =  $[\sigma^2(F_o^2)]^{-1}$   
 CCDC #2156255 (**7**), 2156262 (**8**), 2156256 (**9**)

**Table S4.** Crystallographic data of **10**, **11**, and **12**.

|                                         | <b>10</b>                                                         | <b>11</b>                                                        | <b>12</b>                                                         |
|-----------------------------------------|-------------------------------------------------------------------|------------------------------------------------------------------|-------------------------------------------------------------------|
| Crystal data                            |                                                                   |                                                                  |                                                                   |
| Empirical Formula                       | C <sub>24</sub> H <sub>15</sub> Cl <sub>4</sub> O <sub>2</sub> Sb | C <sub>24</sub> H <sub>13</sub> Cl <sub>4</sub> O <sub>2</sub> P | C <sub>24</sub> H <sub>13</sub> Cl <sub>4</sub> O <sub>2</sub> Sb |
| Formula Weight                          | 598.91                                                            | 506.11                                                           | 596.89                                                            |
| Crystal Dimension, mm <sup>3</sup>      | 1 × 0.8 × 0.38                                                    | 0.479 × 0.457 × 0.236                                            | 0.22 × 0.22 × 0.09                                                |
| Crystal System                          | monoclinic                                                        | triclinic                                                        | monoclinic                                                        |
| Space Group                             | <i>P</i> 2 <sub>1</sub> / <i>n</i>                                | <i>P</i> -1                                                      | <i>C</i> 2/ <i>c</i>                                              |
| a, Å                                    | 10.3586(7)                                                        | 9.3999(8)                                                        | 21.6414(7)                                                        |
| b, Å                                    | 10.8901(9)                                                        | 13.508(1)                                                        | 16.1963(6)                                                        |
| c, Å                                    | 21.116(1)                                                         | 17.344(2)                                                        | 25.843(1)                                                         |
| α, deg.                                 | -                                                                 | 89.651(7)                                                        | -                                                                 |
| β, deg.                                 | 102.404(6)                                                        | 85.511(7)                                                        | 96.869(3)                                                         |
| γ, deg.                                 | -                                                                 | 84.269(7)                                                        | -                                                                 |
| Volume, Å <sup>3</sup>                  | 2326.4(3)                                                         | 2184.5(3)                                                        | 8993.2(6)                                                         |
| D <sub>calcd</sub> , g cm <sup>-3</sup> | 1.710                                                             | 1.658                                                            | 1.763                                                             |
| Z                                       | 4                                                                 | 4                                                                | 16                                                                |
| F(000)                                  | 1176.0                                                            | 1024.0                                                           | 4672.0                                                            |
| Data Collection                         |                                                                   |                                                                  |                                                                   |
| Temperature, deg.                       | 20.0                                                              | 20.0                                                             | 20.0                                                              |
| 2θmax, deg.                             | 52.742                                                            | 52.744                                                           | 52.742                                                            |
| Tmin/Tmax                               | 0.993 / 0.997                                                     | 0.838 / 0.918                                                    | 0.999 / 0.999                                                     |
| Refinement                              |                                                                   |                                                                  |                                                                   |
| No. of Observed Data                    | 4733                                                              | 8934                                                             | 9183                                                              |
| No. of Parameters                       | 280                                                               | 559                                                              | 559                                                               |
| R1 <sup>a</sup> , wR2 <sup>b</sup>      | 0.0328, 0.0860                                                    | 0.0620, 0.2090                                                   | 0.0302, 0.0740                                                    |
| Goodness of Fit Indicator               | 1.119                                                             | 0.995                                                            | 1.002                                                             |

$$^a R1 = \sum ||F_o| - |F_c| | / \sum |F_o| \quad ^b wR2 = [ \sum w ((F_o^2 - F_c^2)^2 / \sum w (F_o^2)^2 )^{1/2} \quad w = [ \sigma^2(F_o^2) ]^{-1}$$

CCDC #2156260 (**10**), 2156259 (**11**), 2156261 (**12**)



**Table S5.** ORTEP drawing (ellipsoids at 50% probability), selected distances, and angles of **4**. Hydrogen atoms were omitted for clarity.

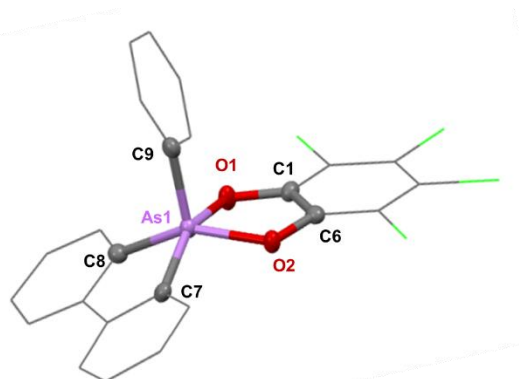

| distances (Å) |          |        |          | angles (°) |         |           |          |
|---------------|----------|--------|----------|------------|---------|-----------|----------|
| As1-C7        | 1.937(4) | As1-O2 | 1.877(3) | C8-As1-C7  | 88.0(2) | C8-As1-C9 | 110.7(2) |
| As1-C8        | 1.942(4) | C6-C1  | 1.400(6) | C7-As1-O2  | 87.9(1) | C8-As1-O2 | 148.3(1) |
| As1-C9        | 1.930(3) | O1-C1  | 1.344(4) | O2-As1-O1  | 83.6(1) | C7-As1-O1 | 154.5(1) |
| As1-O1        | 1.917(3) | O2-C6  | 1.357(5) | O1-As1-C8  | 86.7(1) |           |          |

**Table S6.** ORTEP drawing (ellipsoids at 50% probability), selected distances, and angles of **5**. Hydrogen atoms were omitted for clarity.

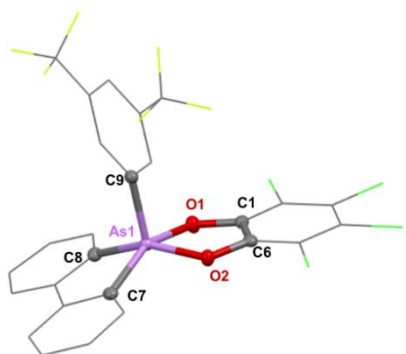

| distances (Å) |          |        |          | angles (°) |          |           |           |
|---------------|----------|--------|----------|------------|----------|-----------|-----------|
| As1-C7        | 1.943(2) | As1-O2 | 1.902(1) | C8-As1-C7  | 88.23(8) | C8-As1-C9 | 104.86(8) |
| As1-C8        | 1.941(2) | C6-C1  | 1.397(2) | C7-As1-O2  | 88.88(7) | C8-As1-O2 | 156.60(7) |
| As1-C9        | 1.938(2) | O1-C1  | 1.346(2) | O2-As1-O1  | 83.96(6) | C7-As1-O1 | 153.78(7) |
| As1-O1        | 1.881(1) | O2-C6  | 1.351(2) | O1-As1-C8  | 88.46(7) |           |           |

**Table S7.** ORTEP drawing (ellipsoids at 50% probability), selected distances, and angles of **6**. Hydrogen atoms were omitted for clarity.

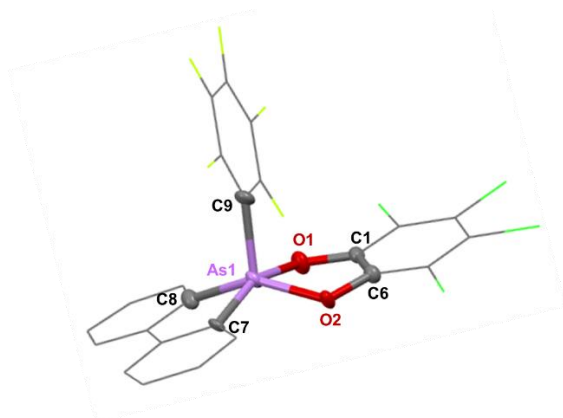

| distances (Å) |          |        |          | angles (°) |         |           |          |
|---------------|----------|--------|----------|------------|---------|-----------|----------|
| As1-C7        | 1.940(6) | As1-O2 | 1.881(6) | C8-As1-C7  | 89.1(3) | C8-As1-C9 | 108.5(3) |
| As1-C8        | 1.935(7) | C6-C1  | 1.369(9) | C7-As1-O2  | 88.3(3) | C8-As1-O2 | 148.3(3) |
| As1-C9        | 1.944(8) | O1-C1  | 1.33(1)  | O2-As1-O1  | 83.2(2) | C7-As1-O1 | 158.6(3) |
| As1-O1        | 1.905(4) | O2-C6  | 1.360(8) | O1-As1-C8  | 88.0(3) |           |          |

**Table S8.** ORTEP drawing (ellipsoids at 50% probability), selected distances, and angles of **7**. Hydrogen atoms were omitted for clarity.

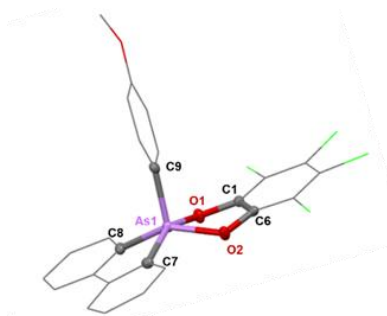

| distances (Å) |          |        |          | angles (°) |          |           |           |
|---------------|----------|--------|----------|------------|----------|-----------|-----------|
| As1-C7        | 1.941(2) | As1-O2 | 1.897(1) | C8-As1-C7  | 88.16(8) | C8-As1-C9 | 108.16(8) |
| As1-C8        | 1.935(2) | C6-C1  | 1.399(3) | C7-As1-O2  | 87.38(7) | C8-As1-O2 | 149.50(7) |
| As1-C9        | 1.908(2) | O1-C1  | 1.342(2) | O2-As1-O1  | 82.36(6) | C7-As1-O1 | 153.45(7) |
| As1-O1        | 1.923(1) | O2-C6  | 1.345(2) | O1-As1-C8  | 88.41(7) |           |           |

**Table S9.** ORTEP drawing (ellipsoids at 50% probability), selected distances, and angles of **8**. Hydrogen atoms were omitted for clarity.

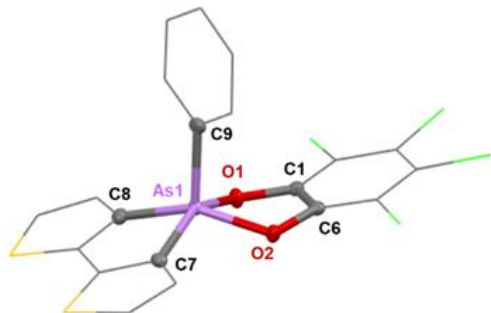

| distances (Å) |          |        |          | angles (°) |          |           |           |
|---------------|----------|--------|----------|------------|----------|-----------|-----------|
| As1-C7        | 1.944(2) | As1-O2 | 1.909(2) | C8-As1-C7  | 87.56(8) | C8-As1-C9 | 107.82(9) |
| As1-C8        | 1.942(2) | C6-C1  | 1.403(3) | C7-As1-O2  | 88.06(7) | C8-As1-O2 | 154.07(8) |
| As1-C9        | 1.925(2) | O1-C1  | 1.350(2) | O2-As1-O1  | 83.04(6) | C7-As1-O1 | 149.99(8) |
| As1-O1        | 1.897(2) | O2-C6  | 1.347(2) | O1-As1-C8  | 88.10(8) |           |           |

**Table S10.** ORTEP drawing (ellipsoids at 50% probability), selected distances, and angles of **1**. Hydrogen atoms were omitted for clarity.

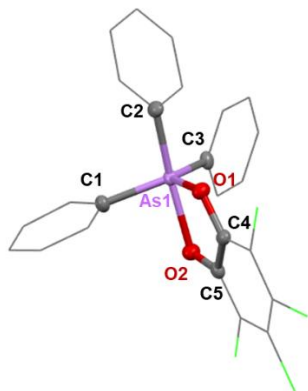

| distances (Å) |          |        |          | angles (°) |          |           |          |
|---------------|----------|--------|----------|------------|----------|-----------|----------|
| As1-C1        | 1.926(3) | As1-O2 | 2.068(2) | C1-As1-O1  | 116.2(1) | C2-As1-O1 | 87.7(1)  |
| As1-C2        | 1.969(3) | C5-C4  | 1.403(3) | O1-As1-C3  | 123.8(1) | C2-As1-C3 | 99.9(1)  |
| As1-C3        | 1.945(3) | O1-C4  | 1.367(3) | C3-As1-C1  | 116.8(1) | C2-As1-O2 | 169.4(1) |
| As1-O1        | 1.824(2) | O2-C5  | 1.322(3) | C1-As1-C2  | 100.6(1) | O1-As1-O2 | 81.67(8) |

**Table S11.** ORTEP drawing (ellipsoids at 50% probability), selected distances, and angles of **2**. Hydrogen atoms were omitted for clarity.

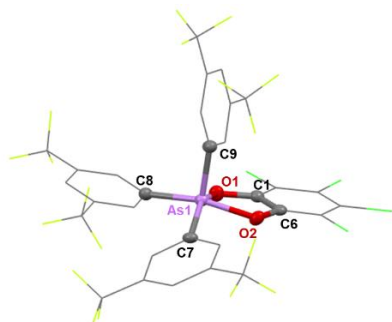

| distances (Å) |          |        |          | angles (°) |         |           |          |
|---------------|----------|--------|----------|------------|---------|-----------|----------|
| As1-C7        | 1.966(4) | As1-O2 | 1.920(3) | C8-As1-C7  | 98.7(2) | C8-As1-C9 | 100.1(2) |
| As1-C8        | 1.975(4) | C6-C1  | 1.386(6) | C7-As1-O2  | 84.9(1) | C8-As1-O2 | 161.0(1) |
| As1-C9        | 1.937(4) | O1-C1  | 1.352(5) | O2-As1-O1  | 83.3(1) | C7-As1-O1 | 147.5(1) |
| As1-O1        | 1.862(2) | O2-C6  | 1.347(5) | O1-As1-C8  | 83.9(1) |           |          |

**Table S12.** ORTEP drawing (ellipsoids at 50% probability), selected distances, and angles of **3**. Hydrogen atoms were omitted for clarity.

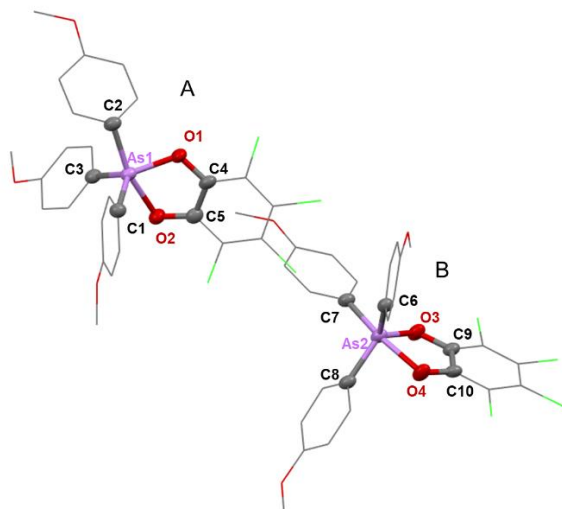

A

| distances (Å) |          |        |          | angles (°) |          |           |          |
|---------------|----------|--------|----------|------------|----------|-----------|----------|
| As1-C1        | 1.914(4) | As1-O2 | 2.083(3) | C1-As1-O1  | 110.8(1) | C2-As1-O1 | 86.6(1)  |
| As1-C2        | 1.948(4) | C5-C4  | 1.411(6) | O1-As1-C3  | 130.9(1) | C2-As1-C3 | 99.2(2)  |
| As1-C3        | 1.922(4) | O1-C4  | 1.372(4) | C3-As1-C1  | 114.8(2) | C2-As1-O2 | 162.7(1) |
| As1-O1        | 1.838(3) | O2-C5  | 1.308(5) | C1-As1-C2  | 103.7(2) | O1-As1-O2 | 80.1(1)  |

B

| distances (Å) |          |        |          | angles (°) |          |           |          |
|---------------|----------|--------|----------|------------|----------|-----------|----------|
| As2-C6        | 1.909(4) | As2-O4 | 2.107(3) | C6-As2-O3  | 117.8(1) | C7-As2-O3 | 89.4(1)  |
| As2-C7        | 1.949(4) | C10-C9 | 1.405(6) | O3-As2-C8  | 116.5(1) | C7-As2-C8 | 100.9(2) |
| As2-C8        | 1.917(4) | O3-C9  | 1.356(5) | C8-As2-C6  | 121.9(2) | C7-As2-O4 | 170.6(1) |
| As2-O3        | 1.820(2) | O4-C10 | 1.311(4) | C6-As2-C7  | 98.8(2)  | O3-As2-O4 | 81.2(1)  |

**Table S13.** ORTEP drawing (ellipsoids at 50% probability), selected distances, and angles of **11**. Hydrogen atoms were omitted for clarity.

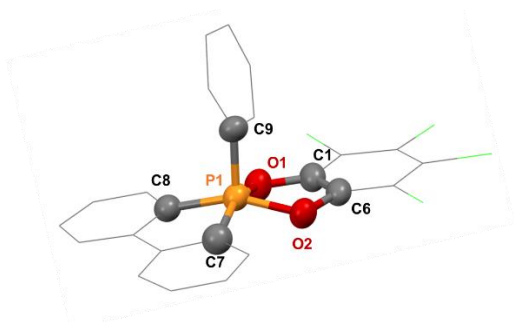

| distances (Å) |          |       |          | angles (°) |         |          |          |
|---------------|----------|-------|----------|------------|---------|----------|----------|
| P1-C7         | 1.827(5) | P1-O2 | 1.739(3) | C8-P1-C7   | 89.5(2) | C8-P1-C9 | 104.3(2) |
| P1-C8         | 1.856(4) | C6-C1 | 1.372(6) | C7-P1-O2   | 86.6(2) | C8-P1-O2 | 155.9(2) |
| P1-C9         | 1.795(4) | O1-C1 | 1.358(4) | O2-P1-O1   | 86.9(1) | C7-P1-O1 | 154.9(2) |
| P1-O1         | 1.737(3) | O2-C6 | 1.363(5) | O1-P1-C8   | 86.6(2) |          |          |

**Table S14.** ORTEP drawing (ellipsoids at 50% probability), selected distances, and angles of **9**.  
Hydrogen atoms were omitted for clarity.

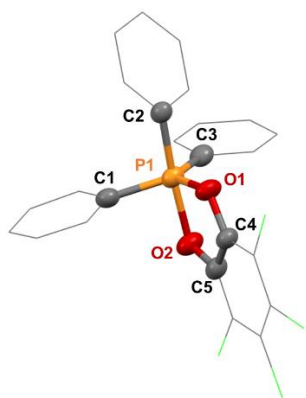

| distances (Å) |          |       |          | angles (°) |          |          |          |
|---------------|----------|-------|----------|------------|----------|----------|----------|
| P1-C1         | 1.809(4) | P1-O2 | 1.916(2) | C1-P1-O1   | 119.8(1) | C2-P1-O1 | 89.6(1)  |
| P1-C2         | 1.864(2) | C5-C4 | 1.372(4) | O1-P1-C3   | 120.2(1) | C2-P1-C3 | 95.3(1)  |
| P1-C3         | 1.811(4) | O1-C4 | 1.375(3) | C3-P1-C1   | 118.4(1) | C2-P1-O2 | 175.0(1) |
| P1-O1         | 1.640(2) | O2-C5 | 1.333(3) | C1-P1-C2   | 97.7(1)  | O1-P1-O2 | 85.8(1)  |

**Table S15.** ORTEP drawing (ellipsoids at 50% probability), selected distances, and angles of **12**.  
Hydrogen atoms were omitted for clarity.

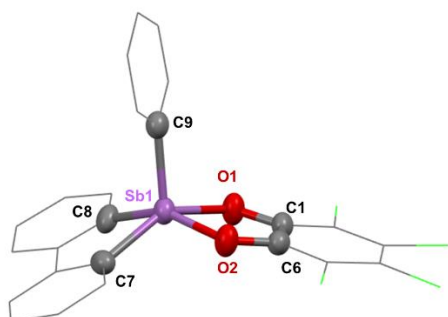

| distances (Å) |          |        |          | angles (°) |          |           |          |
|---------------|----------|--------|----------|------------|----------|-----------|----------|
| Sb1-C7        | 2.108(3) | Sb1-O2 | 2.050(2) | C8-Sb1-C7  | 83.8(1)  | C8-Sb1-C9 | 105.0(1) |
| Sb1-C8        | 2.117(3) | C6-C1  | 1.400(4) | C7-Sb1-O2  | 89.7(1)  | C8-Sb1-O2 | 153.5(1) |
| Sb1-C9        | 2.093(3) | O1-C1  | 1.346(3) | O2-Sb1-O1  | 80.00(8) | C7-Sb1-O1 | 146.4(1) |
| Sb1-O1        | 2.028(2) | O2-C6  | 1.340(4) | O1-Sb1-C8  | 91.4(1)  |           |          |

**Table S16.** ORTEP drawing (ellipsoids at 50% probability), selected distances, and angles of **10**. Hydrogen atoms were omitted for clarity.

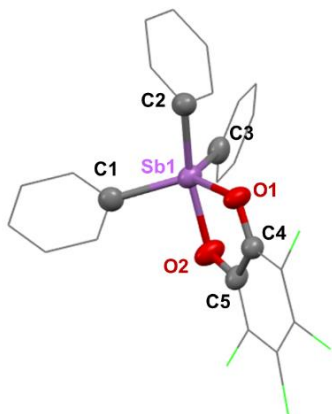

| distances (Å) |          |        |          | angles (°) |          |            |          |
|---------------|----------|--------|----------|------------|----------|------------|----------|
| Sb1-C1        | 2.122(3) | Sb1-O2 | 2.105(2) | C1- Sb1-O1 | 123.9(1) | C2- Sb1-O1 | 85.1(1)  |
| Sb1-C2        | 2.141(4) | C5-C4  | 1.407(5) | O1- Sb1-C3 | 121.8(1) | C2- Sb1-C3 | 99.9(1)  |
| Sb1-C3        | 2.107(4) | O1-C4  | 1.345(4) | C3- Sb1-C1 | 111.7(1) | C2- Sb1-O2 | 163.2(1) |
| Sb1-O1        | 2.016(2) | O2-C5  | 1.325(4) | C1- Sb1-C2 | 102.0(1) | O1- Sb1-O2 | 78.10(9) |

### 3. UV-vis absorption spectra and CV data

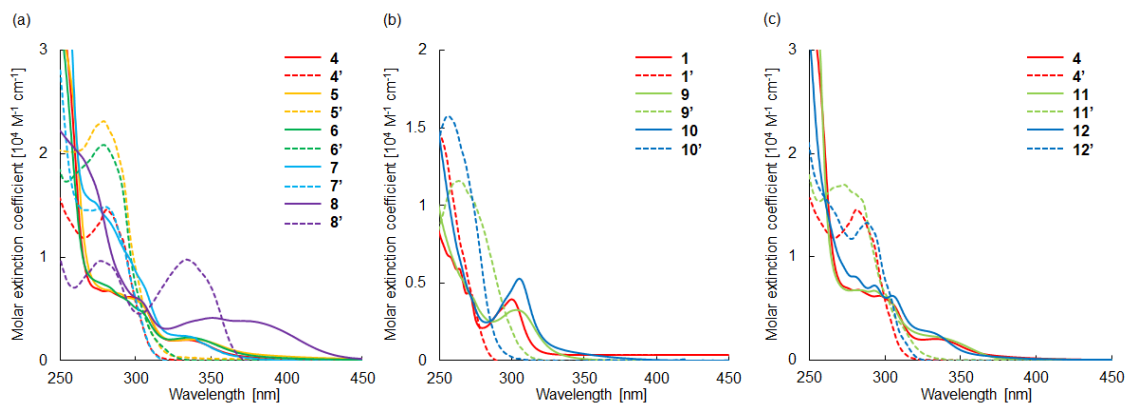

**Figure S22.** UV-vis absorption spectra (in  $\text{CH}_2\text{Cl}_2$  or  $\text{CHCl}_3$ ) of (a) **4-8** and **4'-8'**, (b) **1, 9, 10, 1', 9'**, and **10'**, and (c) **4, 11, 12, 4', 11',** and **12'**

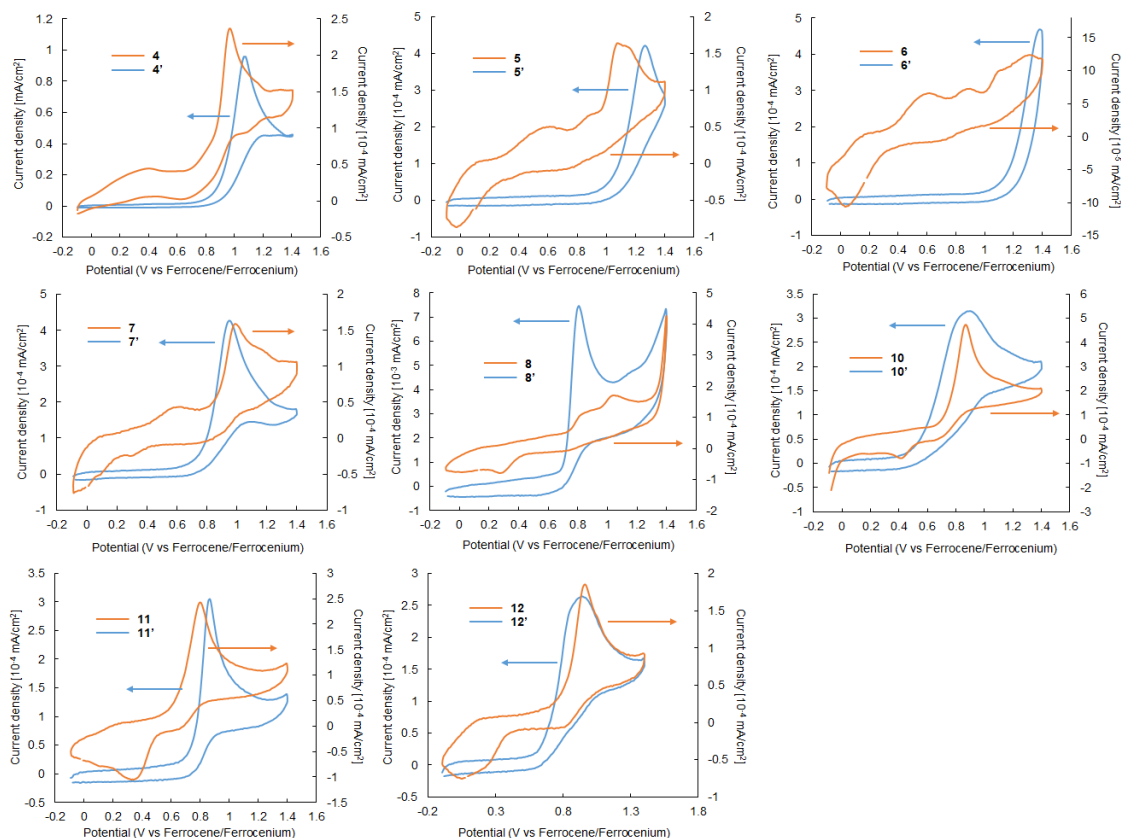

**Figure S23.** Cyclic voltammograms of X in 0.1 M Bu<sub>4</sub>NPF<sub>6</sub>/MeCN at a scan rate of 100 mV/s. X: **4** (0.5 mM), **4'** (0.5 mM), **5** (0.4 mM), **5'** (1 mM), **6** (0.4 mM), **6'** (1 mM), **7** (0.4 mM), **7'** (1 mM), **8** (0.4 mM), **8'** (1 mM), **10** (1 mM), **10'** (1 mM), **11** (0.4 mM), **11'** (1 mM), **12** (0.4 mM), and **12'** (1 mM).

**Table S17.** Results of UV-vis absorption measurement<sup>[a]</sup> and cyclic voltammetry<sup>[b]</sup>

|           | $\lambda_{\text{abs}}^{[c]}$<br>[nm] | $E^{[d]}$<br>[eV] | HOMO <sup>[e]</sup><br>[eV] | LUMO <sup>[f]</sup><br>[eV] |            | $\lambda_{\text{abs}}^{[c]}$<br>[nm] | $E^{[d]}$<br>[eV] | HOMO <sup>[e]</sup><br>[eV] | LUMO <sup>[f]</sup><br>[eV] |
|-----------|--------------------------------------|-------------------|-----------------------------|-----------------------------|------------|--------------------------------------|-------------------|-----------------------------|-----------------------------|
| <b>4</b>  | 342                                  | 3.35              | -6.20                       | -2.85                       | <b>4'</b>  | 281                                  | 3.99              | -6.23                       | -2.24                       |
| <b>5</b>  | 341                                  | 3.25              | -6.31                       | -3.06                       | <b>5'</b>  | 280                                  | 3.97              | -6.44                       | -2.47                       |
| <b>6</b>  | 343                                  | 3.25              | -6.53                       | -3.28                       | <b>6'</b>  | 280                                  | 3.91              | -6.51                       | -2.60                       |
| <b>7</b>  | 337                                  | 3.32              | -6.18                       | -2.86                       | <b>7'</b>  | 281                                  | 3.98              | -6.10                       | -2.11                       |
| <b>8</b>  | 384                                  | 2.87              | -6.02                       | -3.15                       | <b>8'</b>  | 335                                  | 3.38              | -6.05                       | -2.67                       |
| <b>10</b> | 307                                  | 3.74              | -6.07                       | -2.33                       | <b>10'</b> | 257                                  | 4.29              | -5.84                       | -1.55                       |
| <b>11</b> | 343                                  | 3.33              | -5.99                       | -2.67                       | <b>11'</b> | 275                                  | 3.79              | -6.09                       | -2.30                       |
| <b>12</b> | 340                                  | 3.42              | -6.10                       | -2.69                       | <b>12'</b> | 290                                  | 3.86              | -6.06                       | -2.20                       |

[a] Measured in CH<sub>2</sub>Cl<sub>2</sub> or CHCl<sub>3</sub>. [b] Measured in 0.1 M Bu<sub>4</sub>NPF<sub>6</sub>/MeCN (Figure S23). [c] Absorption maxima. [d] HOMO-LUMO gaps estimated by the offsets of the absorption spectra. [e] Estimated by CV ( $E(\text{HOMO}) = -(E_{\text{ox}} + 4.71)$  [eV], where  $E_{\text{ox}}$  is the onset potential of oxidation (V vs. SHE)). [f] Calculated by the HOMO-LUMO gaps (estimated by UV-vis absorption spectra) and HOMO energies (estimated by CV).



#### 4. Determination of stoichiometry by Job plots

The total concentration of tetrachlorocatecholates and  $\text{Ph}_3\text{PO}$  were both constant and prepared in  $\text{CDCl}_3$ . Then various ratio of mixture solutions was added to the NMR tube. The chemical shifts due to the  $\text{Ph}_3\text{PO}$  in the  $^{31}\text{P}$ -NMR were monitored, and the data were analyzed by using Job plots method. The association stoichiometry was obtained from the x coordinate at the maximum in the curve. The x axis is  $[\text{B}]/([\text{A}]+[\text{B}])$  and the y axis is  $|\Delta\delta| \times [\text{B}]/([\text{A}]+[\text{B}])$ ;  $|\Delta\delta|$  means absolute value of chemical shift variation between the unassociated guest molecule and associated one,  $[\text{A}]$  and  $[\text{B}]$  means concentration of tetrachlorocatecholates and  $\text{Ph}_3\text{PO}$ .

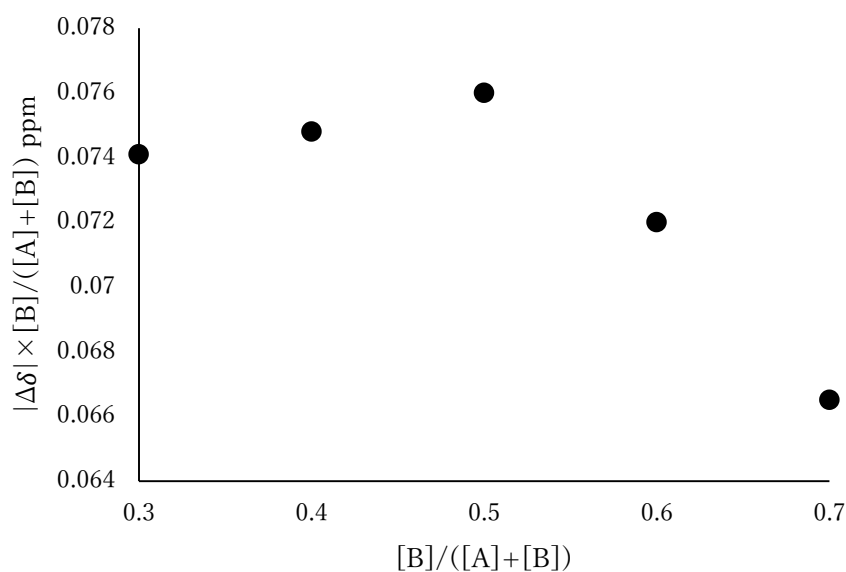

**Figure S24.** Job plots of **4** with  $\text{PPh}_3\text{PO}$  in  $\text{CDCl}_3$ ,  $[\text{A}]+[\text{B}] = 16.0$  mM.

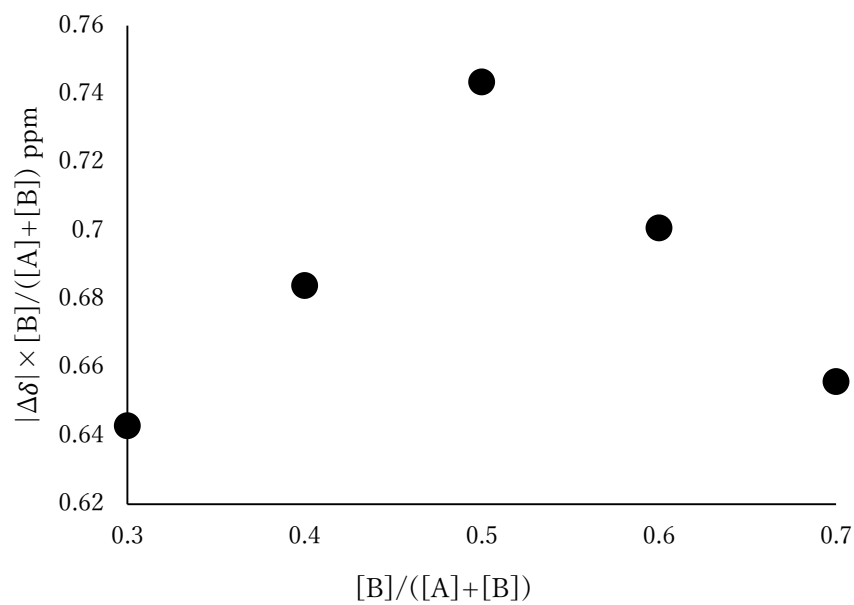

**Figure S25.** Job plots of **5** with PPh<sub>3</sub>PO in CDCl<sub>3</sub>, [A]+[B] = 40.0 mM.

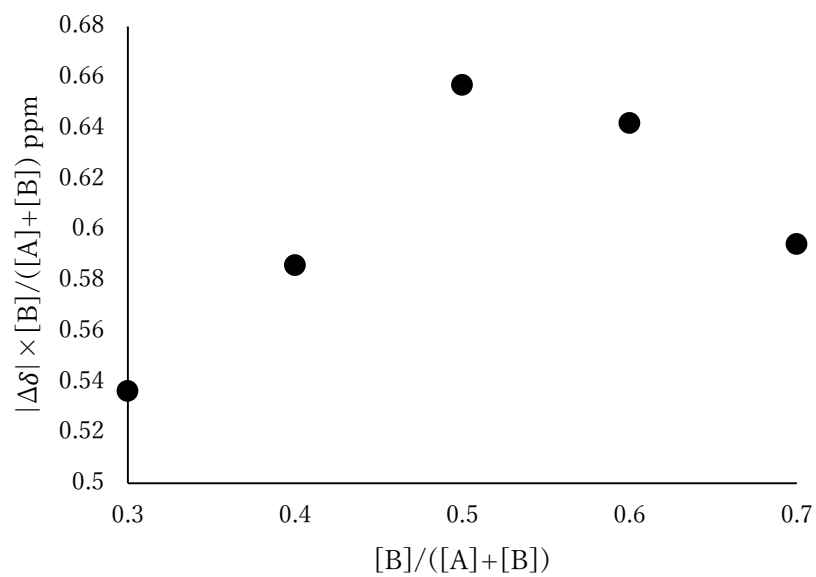

**Figure S26.** Job plots of **6** with PPh<sub>3</sub>PO in CDCl<sub>3</sub>, [A]+[B] = 20.0 mM.

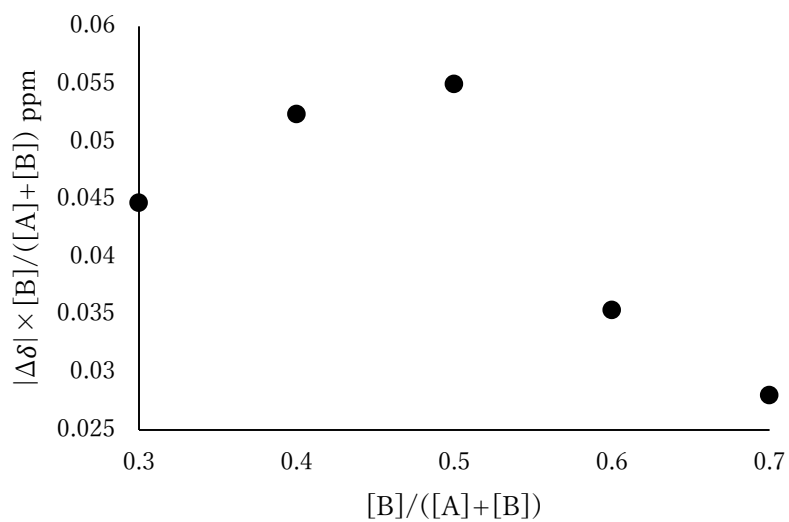

**Figure S27.** Job plots of **7** with  $\text{PPh}_3\text{PO}$  in  $\text{CDCl}_3$ ,  $[A]+[B] = 20.0$  mM.

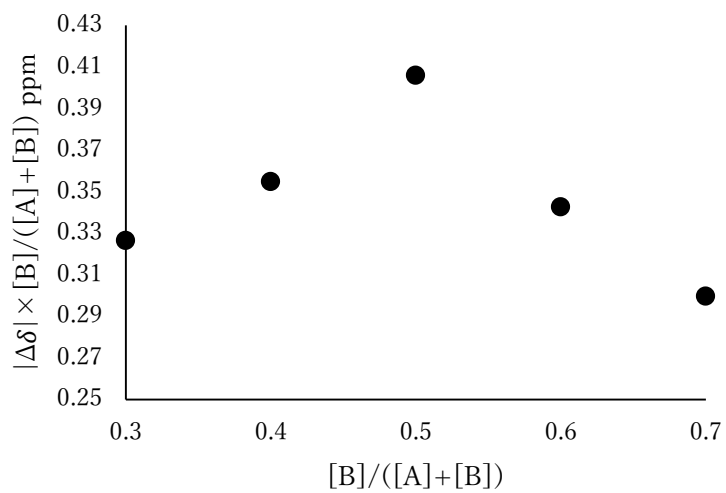

**Figure S28.** Job plots of **8** with  $\text{PPh}_3\text{PO}$  in  $\text{CDCl}_3$ ,  $[A]+[B] = 20.0$  mM.

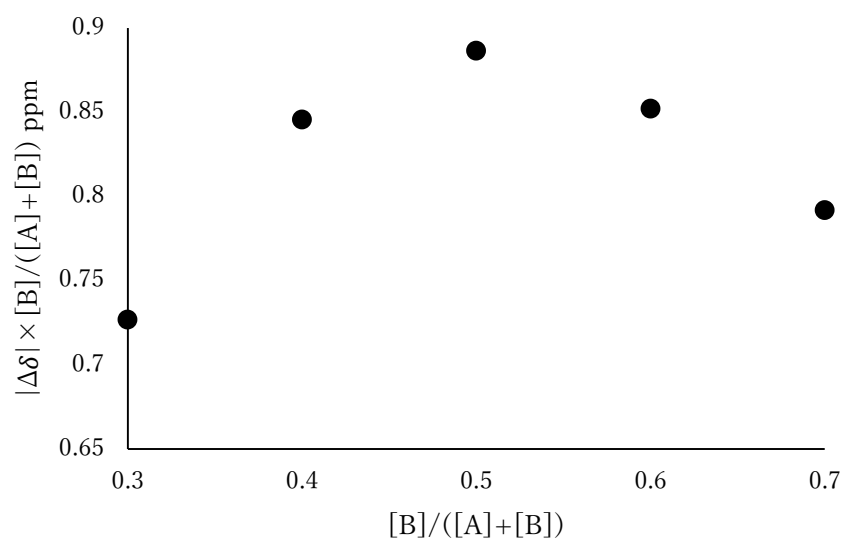

**Figure S29.** Job plots of **10** with  $\text{PPh}_3\text{PO}$  in  $\text{CDCl}_3$ ,  $[A]+[B] = 16.0$  mM.

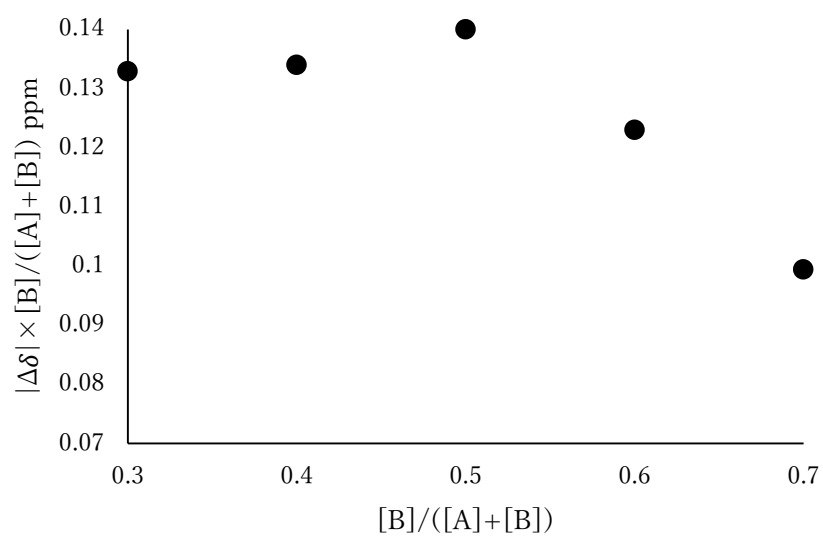

**Figure S30.** Job plots of **11** with  $\text{PPh}_3\text{PO}$  in  $\text{CDCl}_3$ ,  $[A]+[B] = 16.0$  mM.

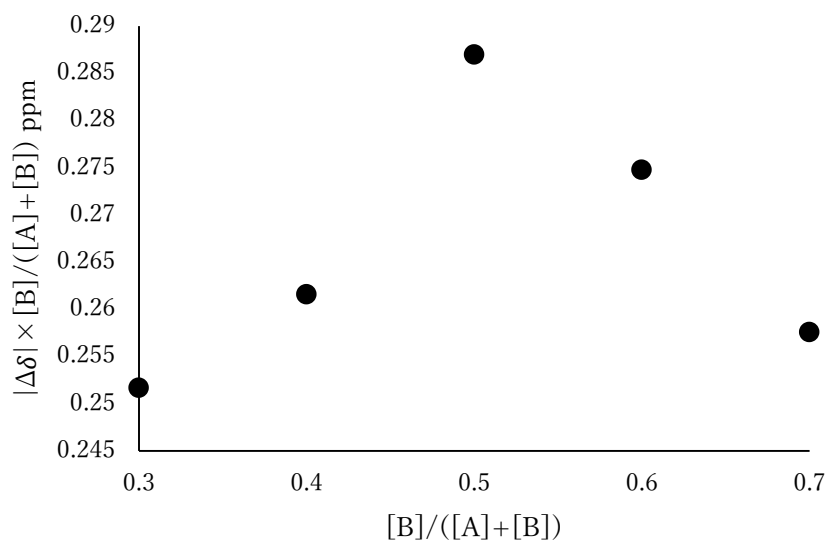

**Figure S31.** Job plots of **12** with PPh<sub>3</sub>PO in CDCl<sub>3</sub>, [A]+[B] = 16.0 mM.

### 5. Determination of association constants

Determination of the association constants for the tetrachlorocatecholates and Ph<sub>3</sub>PO was carried out by NMR titration in CDCl<sub>3</sub>. The chemical shifts due to the Ph<sub>3</sub>PO were monitored in the <sup>31</sup>P-NMR spectra. The concentration of Ph<sub>3</sub>PO ([B]) and solvent ratio were both constant, varied ratio of tetrachlorocatecholates ([A]). Because the host-guest complexation equilibrium has a faster exchange rate compared to the NMR time scale, association constants were determined by non-linear curve fitting analysis<sup>[1]</sup> (1) by down field shifting in <sup>31</sup>P-NMR.

$$|\Delta\delta| = \frac{|\Delta\delta_{\max}|}{2K[B]_0} \left\{ 1 + K[A] + K[B]_0 - \left[ (1 + K[A] + K[B]_0)^2 - 4K^2 [A][B]_0 \right]^{\frac{1}{2}} \right\} \quad (1)$$

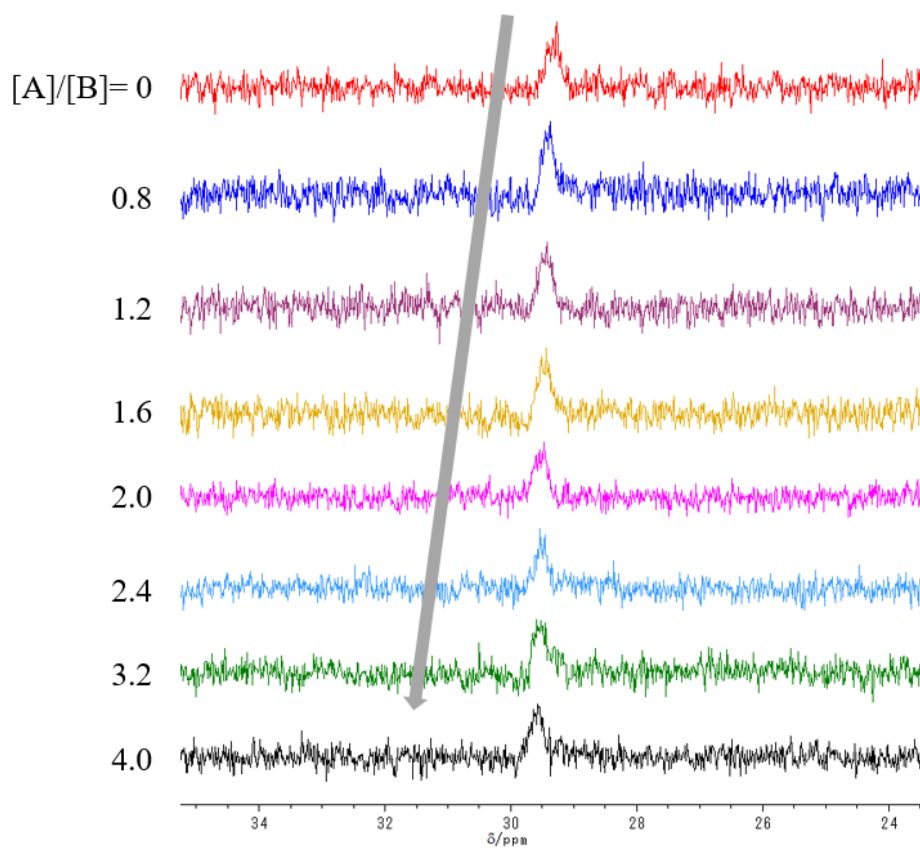

Figure S32.  $^{31}\text{P}$ -NMR spectra of titration;  $\text{PPh}_3\text{O}$  with **4**.

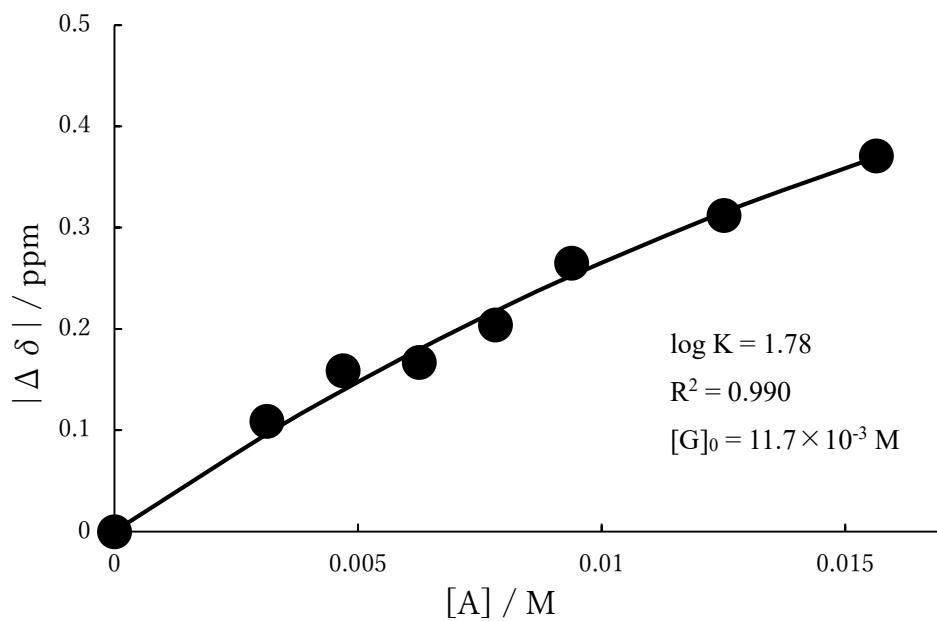

Figure S33.  $^{31}\text{P}$ -NMR titration of  $\text{PPh}_3\text{O}$  with **4**.

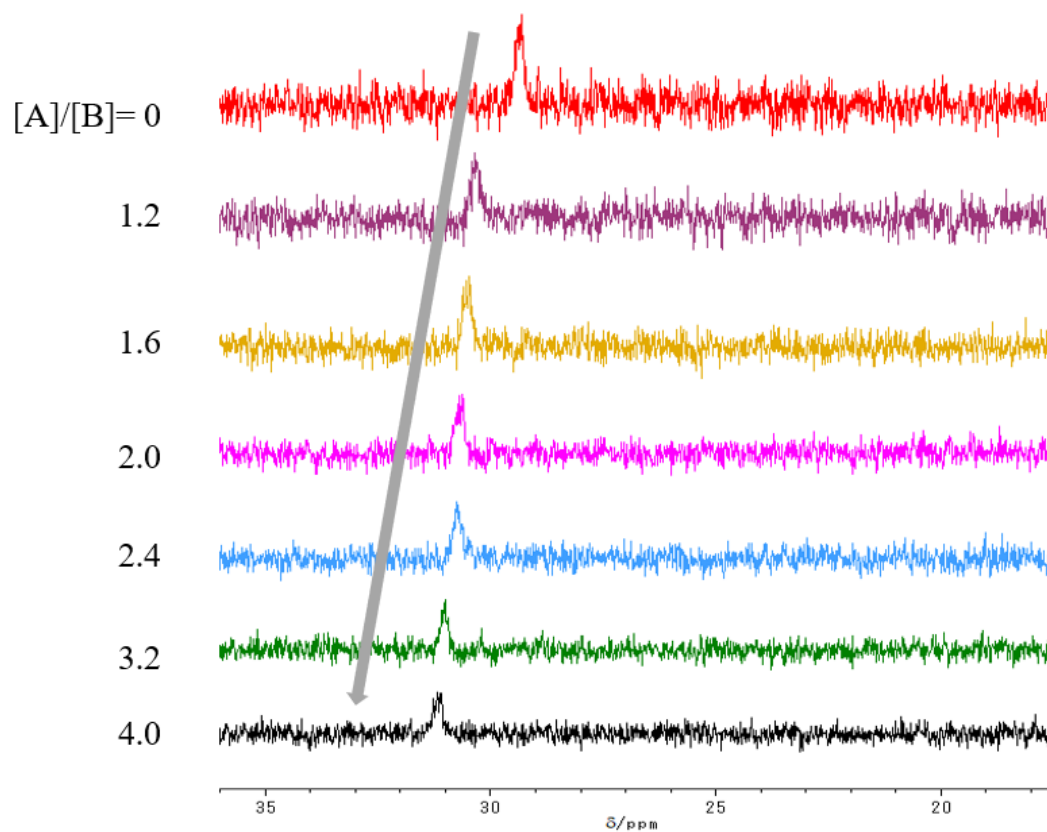

Figure S34.  $^{31}\text{P}$ -NMR spectra of titration;  $\text{PPh}_3\text{O}$  with 5.

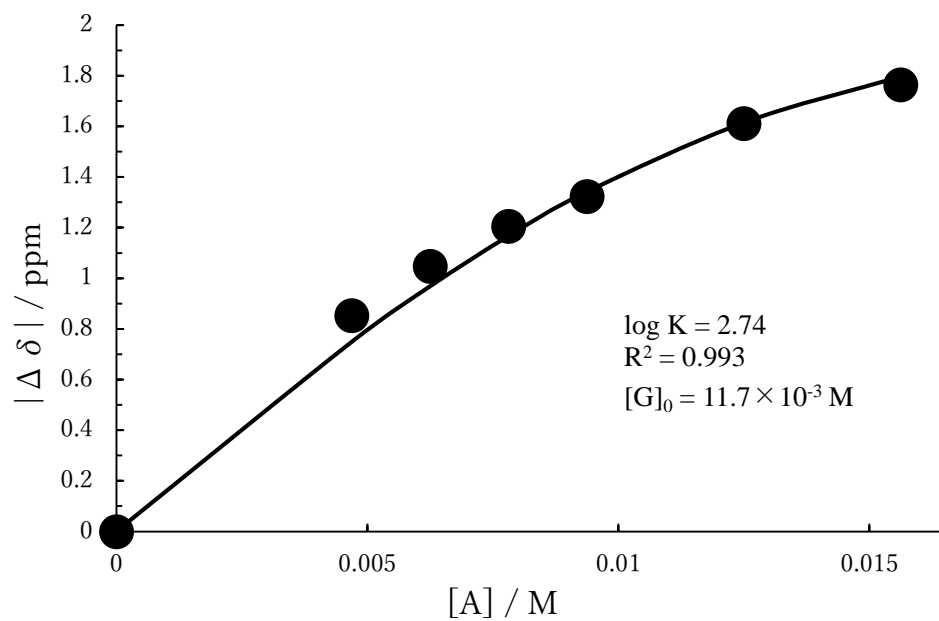

Figure S35.  $^{31}\text{P}$ -NMR titration of  $\text{PPh}_3\text{O}$  with 5.

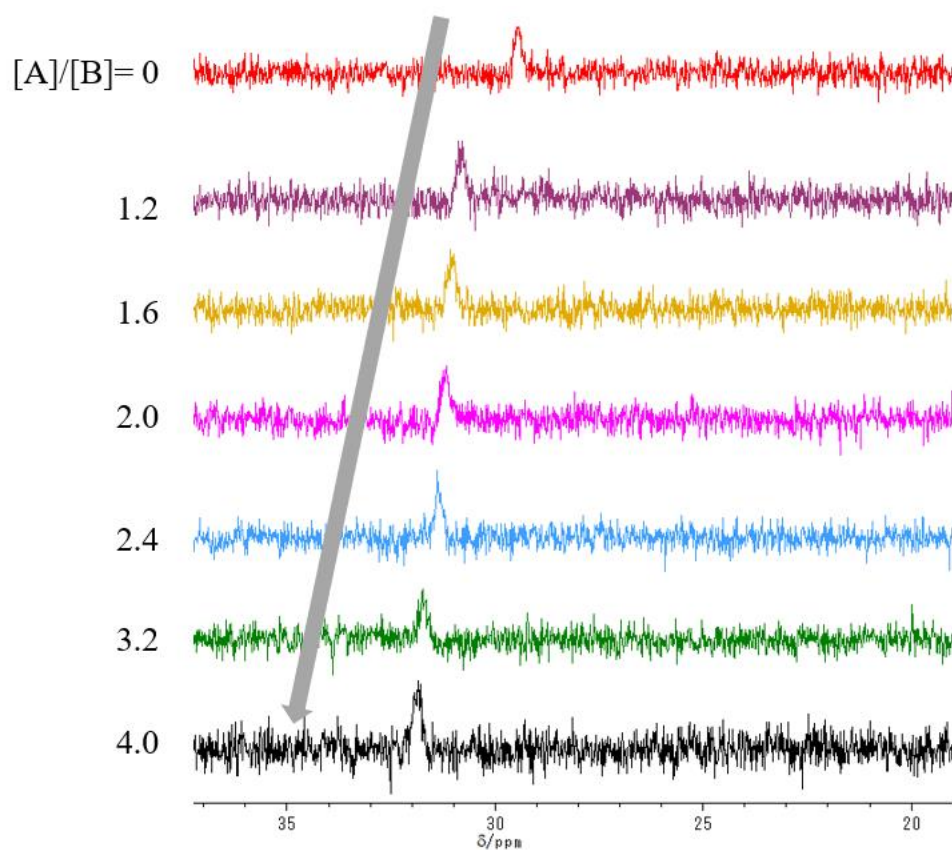

Figure S36.  $^{31}\text{P}$ -NMR spectra of titration;  $\text{PPh}_3\text{O}$  with **6**.

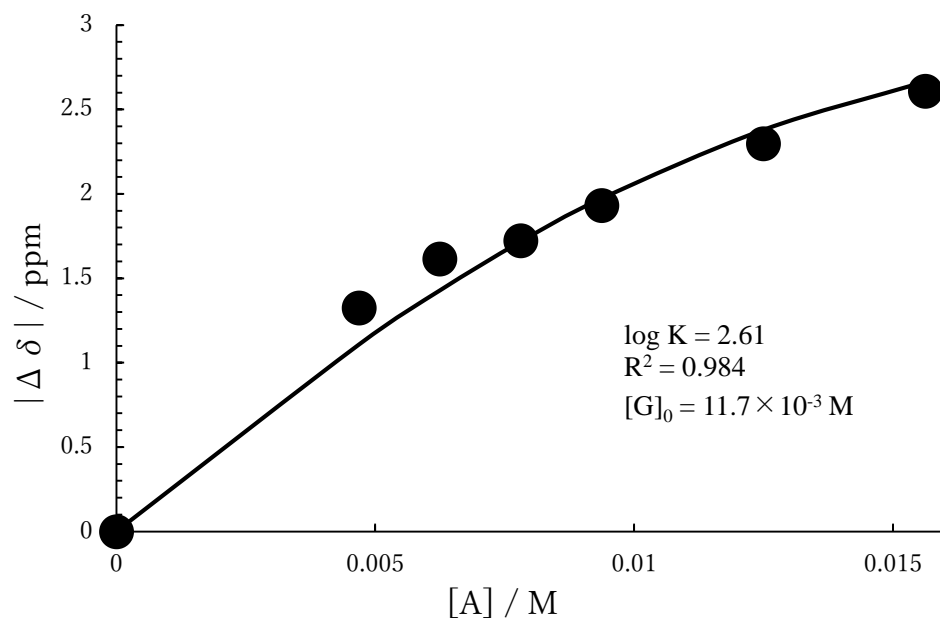

Figure S37.  $^{31}\text{P}$ -NMR titration of  $\text{PPh}_3\text{O}$  with **6**.



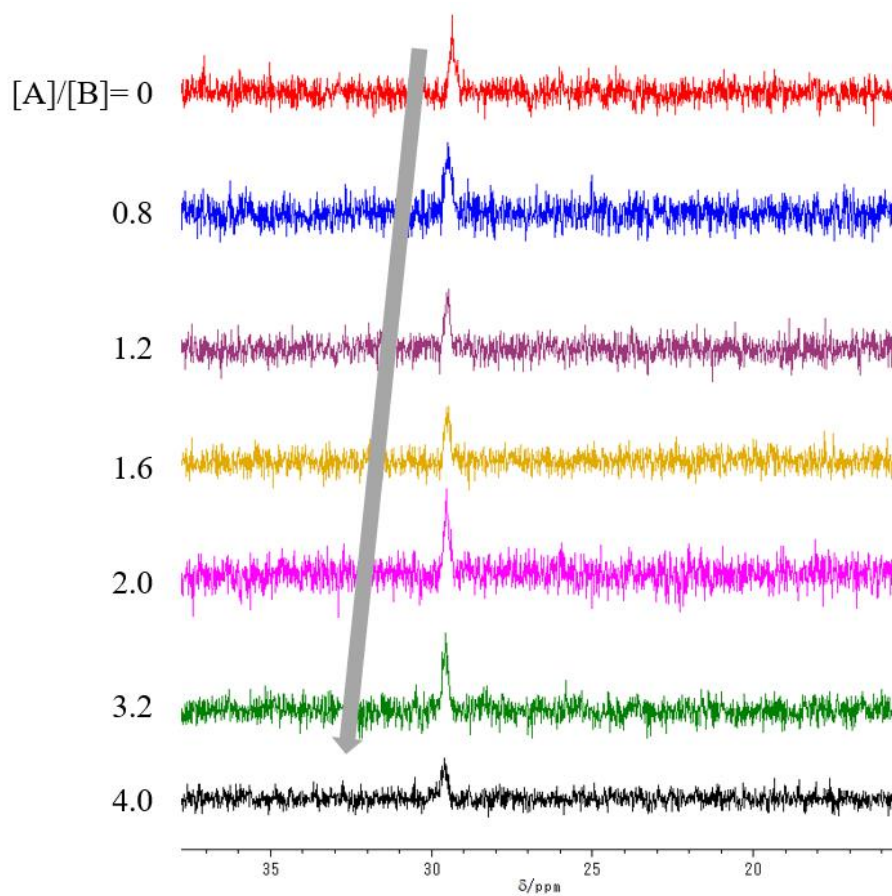

Figure S38.  $^{31}\text{P}$ -NMR spectra of titration;  $\text{PPh}_3\text{O}$  with 7.

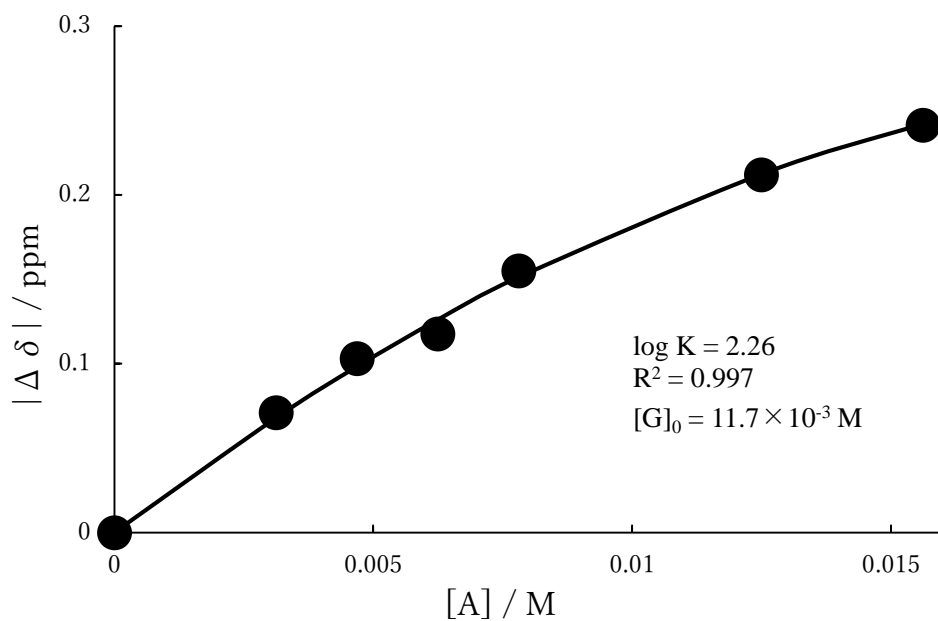

Figure S39.  $^{31}\text{P}$ -NMR titration of  $\text{PPh}_3\text{O}$  with 7.

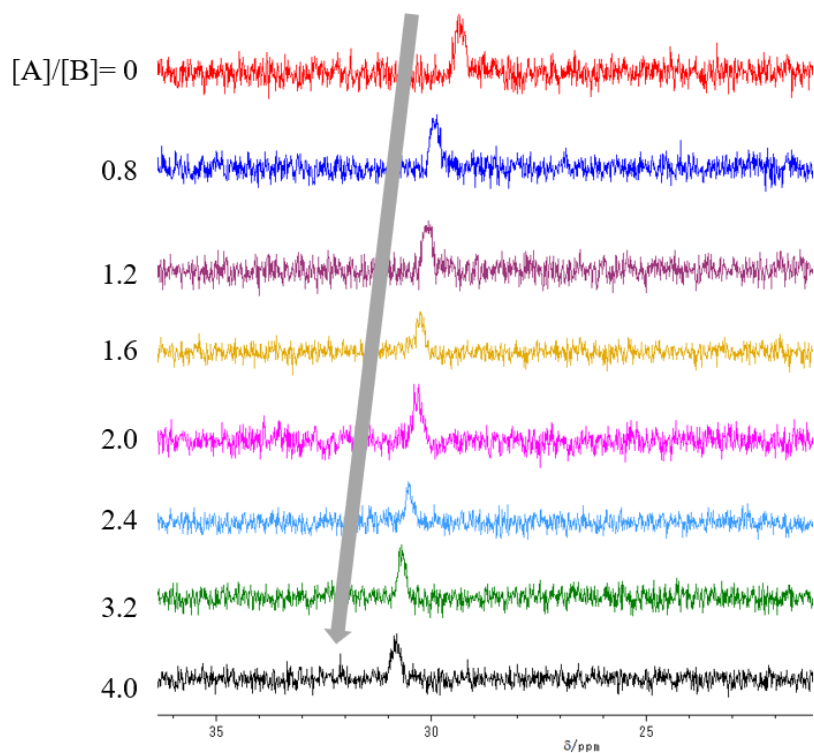

**Figure S40.**  $^{31}\text{P}$ -NMR spectra of titration;  $\text{PPh}_3\text{O}$  with **8**.

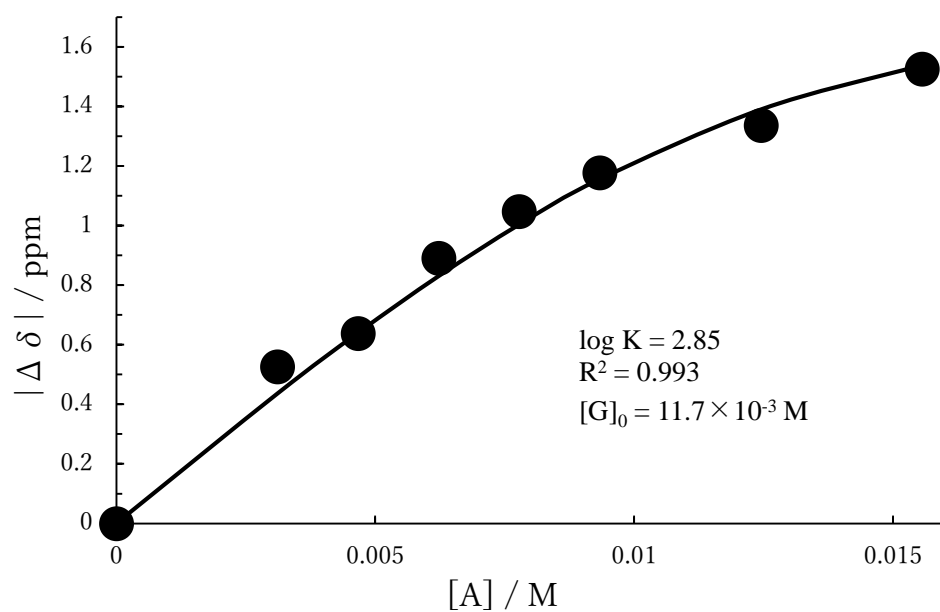

**Figure S41.**  $^{31}\text{P}$ -NMR titration of  $\text{PPh}_3\text{O}$  with **8**.

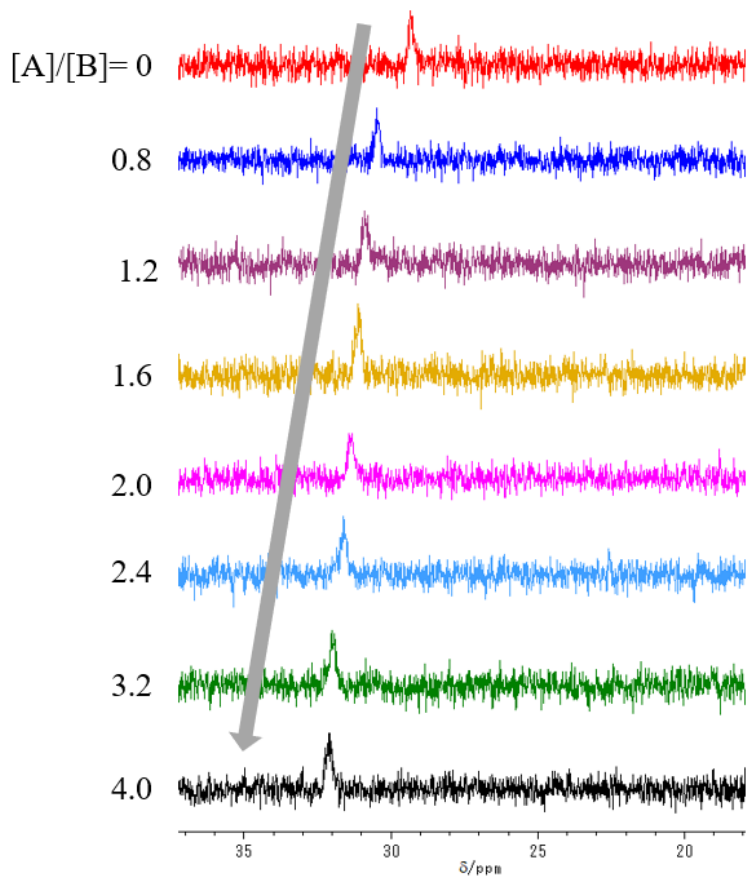

Figure S42.  $^{31}\text{P}$ -NMR spectra of titration;  $\text{PPh}_3\text{O}$  with **10**.

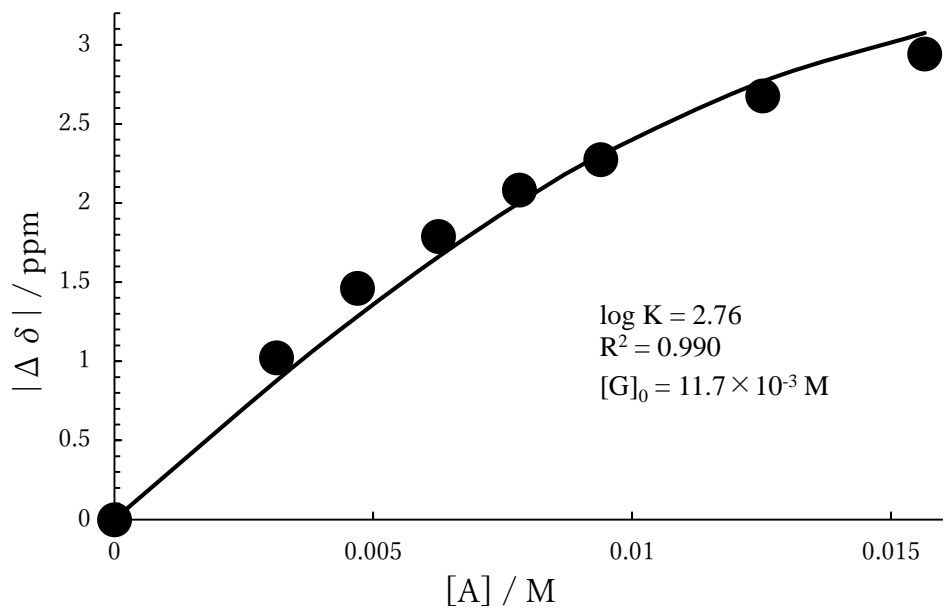

Figure S43.  $^{31}\text{P}$ -NMR titration of  $\text{PPh}_3\text{O}$  with **10**.

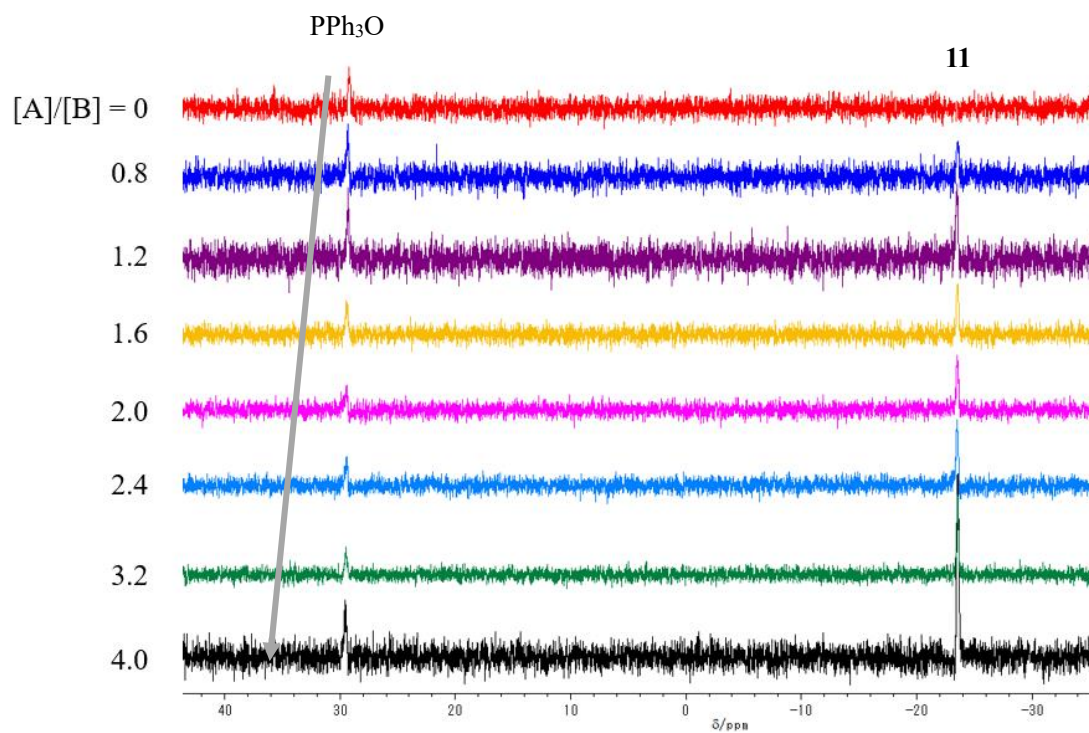

**Figure S44.** <sup>31</sup>P-NMR spectra of titration; PPh<sub>3</sub>O with 11.

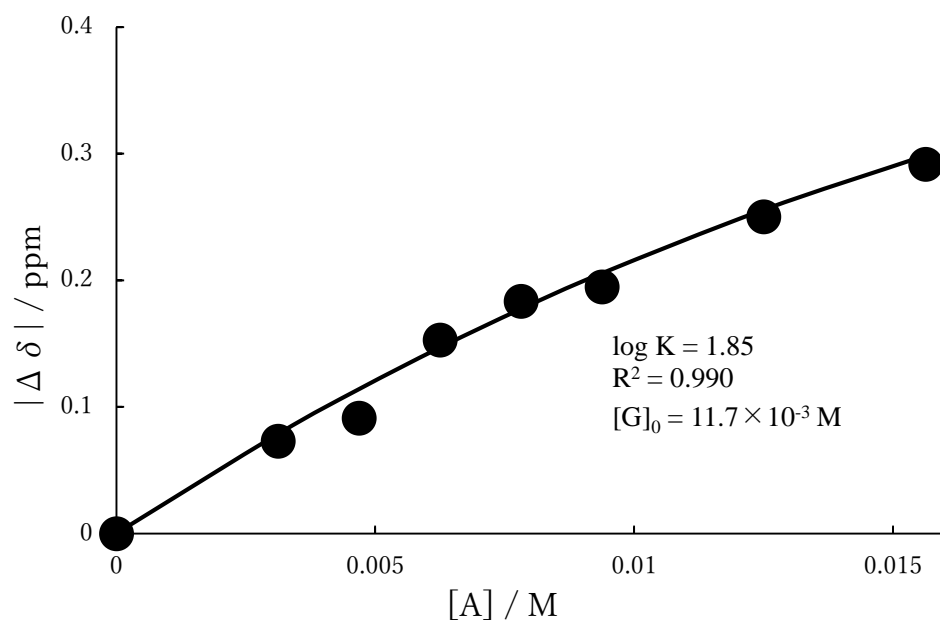

**Figure S45.** <sup>31</sup>P-NMR titration of PPh<sub>3</sub>O with 11.

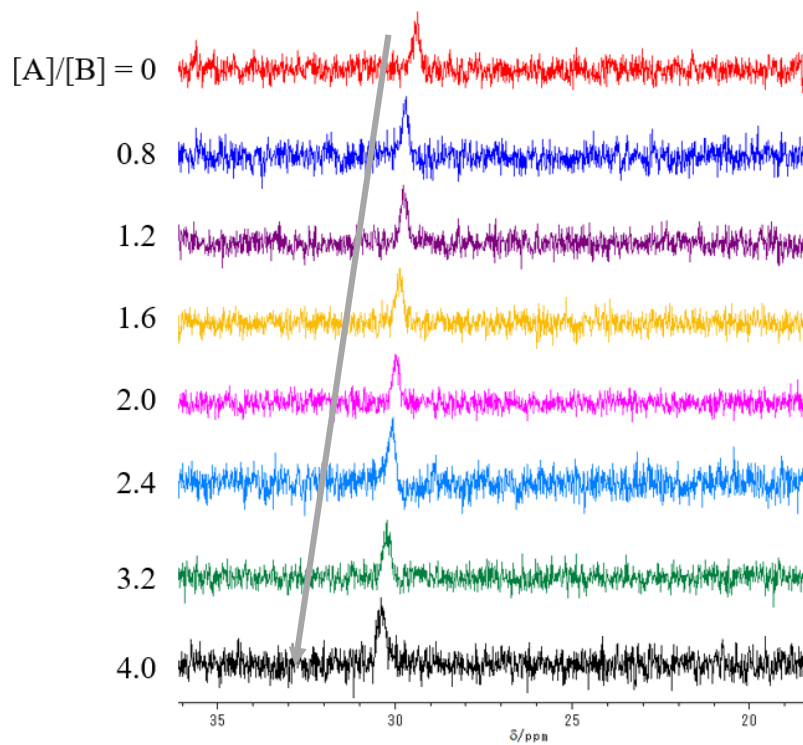

**Figure S46.**  $^{31}\text{P}$ -NMR spectra of titration;  $\text{PPh}_3\text{O}$  with **12**.

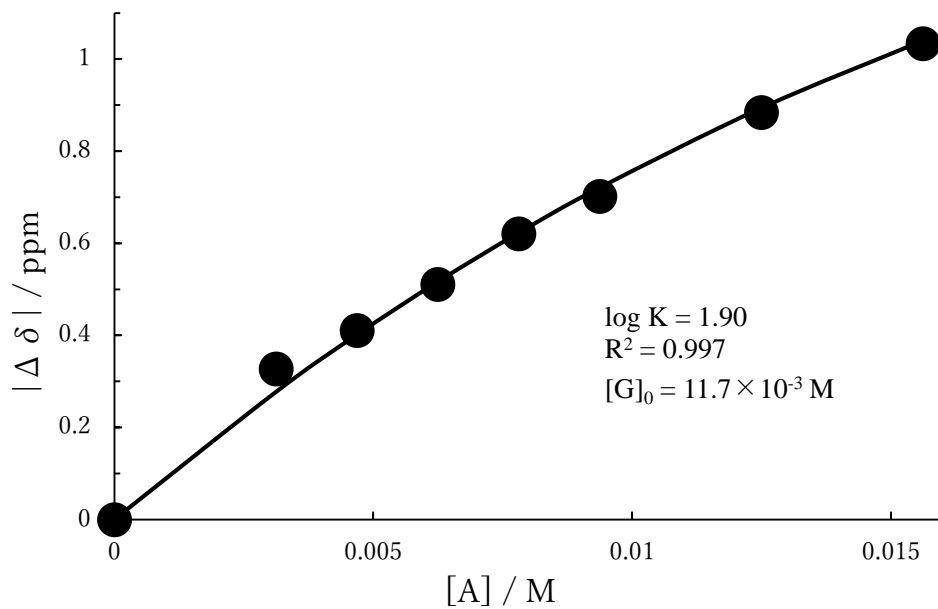

**Figure S47.**  $^{31}\text{P}$ -NMR titration of  $\text{PPh}_3\text{O}$  with **12**.

## 6. Lewis acid-catalyzed bromination

A round bottom flask was charged with NBS (95.5 mg, 0.54 mmol), anisole (58  $\mu$ L, 0.536 mmol) and tetrachlorocatecholates (27  $\mu$ mol) in distilled  $\text{CDCl}_3$  (8 mL). The mixture was stirred at room temperature for 24 h under  $\text{N}_2$  atmosphere and the average NMR yields were estimated using dimethyl terephthalate as an internal standard by performing the experiment at least twice.

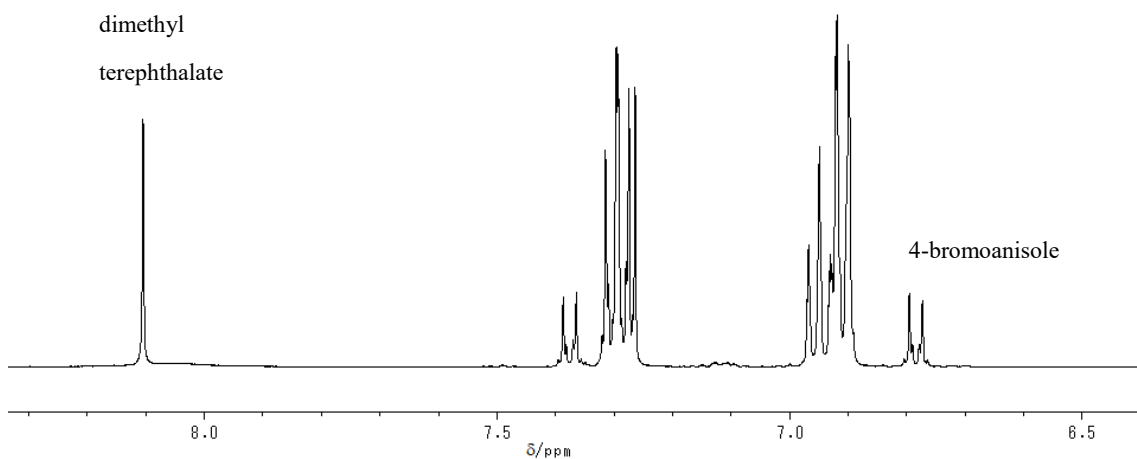

**Figure S48.**  $^1\text{H-NMR}$  spectrum of the crude of the bromination reaction without catalyst.

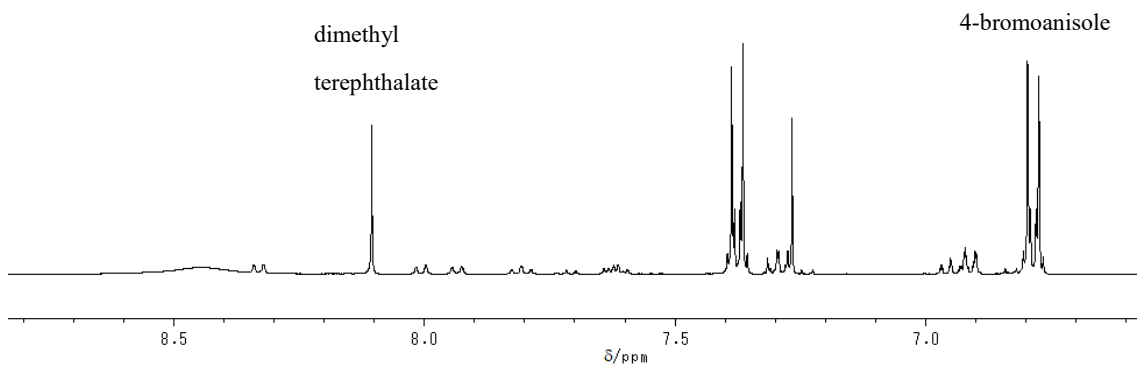

**Figure S49.**  $^1\text{H-NMR}$  spectrum of the crude of the bromination reaction with **4** as a catalyst.

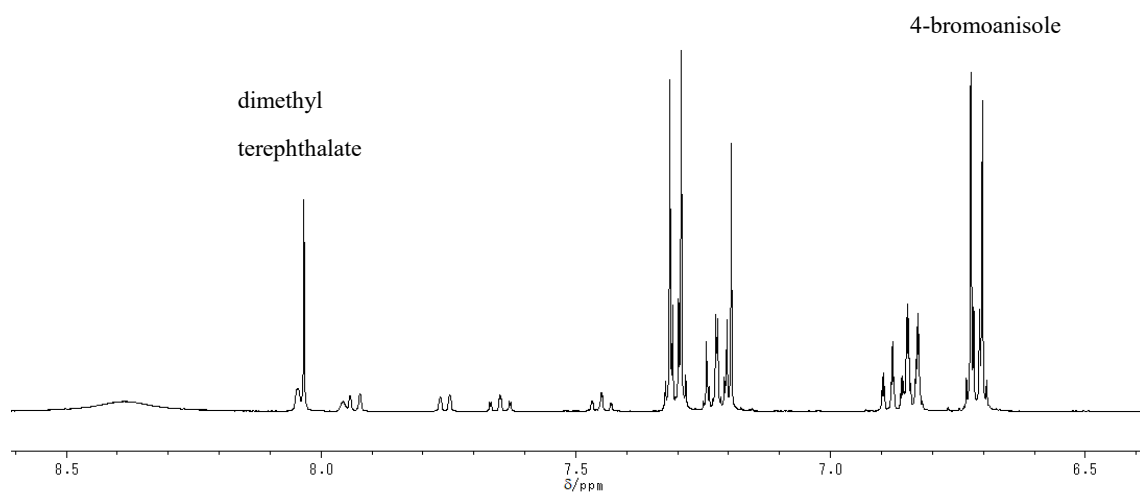

**Figure S50.**  $^1\text{H-NMR}$  spectrum of the crude of the bromination reaction with **5** as a catalyst.

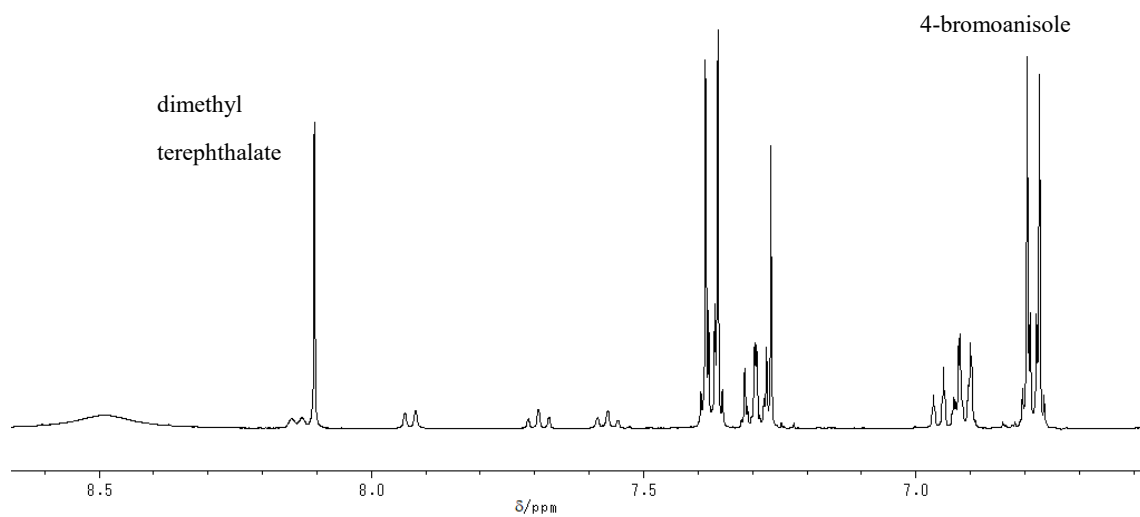

**Figure S51.**  $^1\text{H-NMR}$  spectrum of the crude of the bromination reaction with **6** as a catalyst.

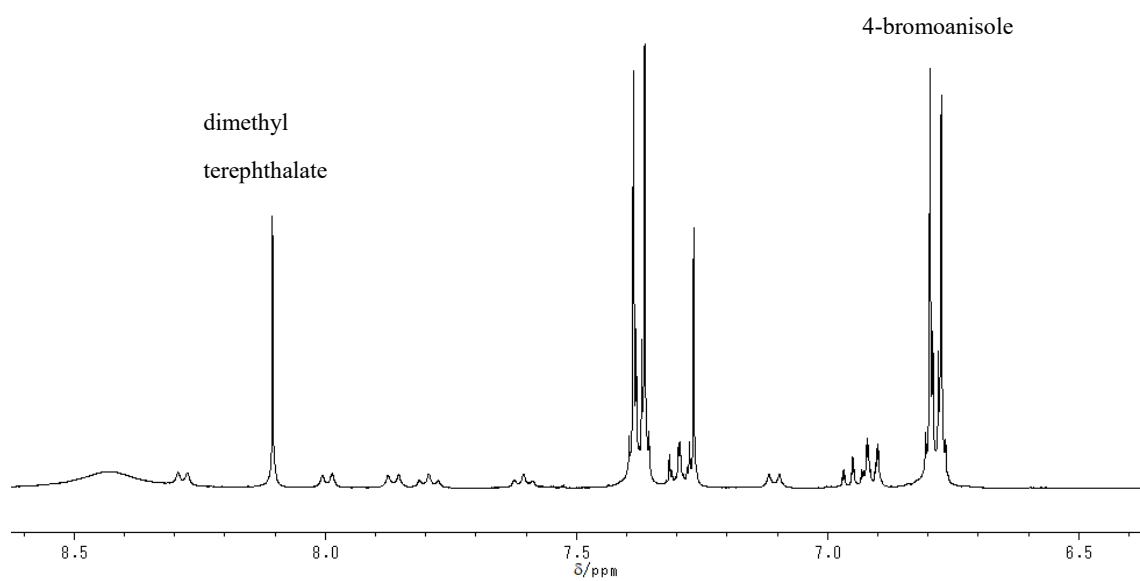

**Figure S52.** <sup>1</sup>H-NMR spectrum of the crude of the bromination reaction with **7** as a catalyst.

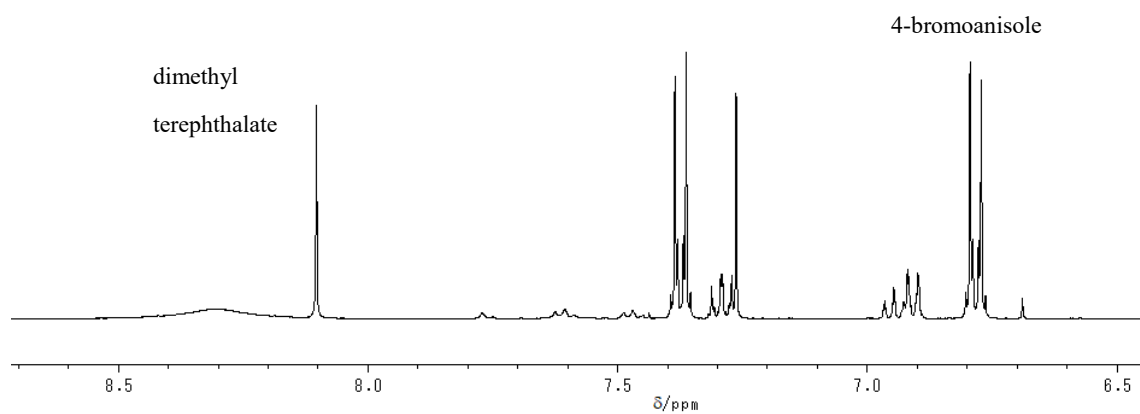

**Figure S53.** <sup>1</sup>H-NMR spectrum of the crude of the bromination reaction with **8** as a catalyst.



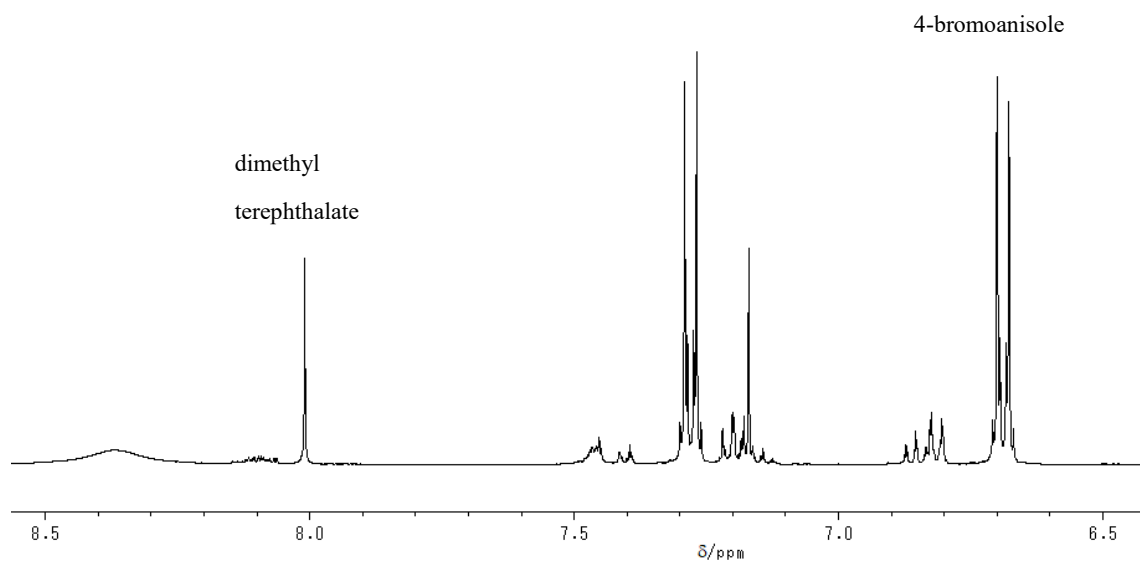

**Figure S54.** <sup>1</sup>H-NMR spectrum of the crude of the bromination reaction with **10** as a catalyst.

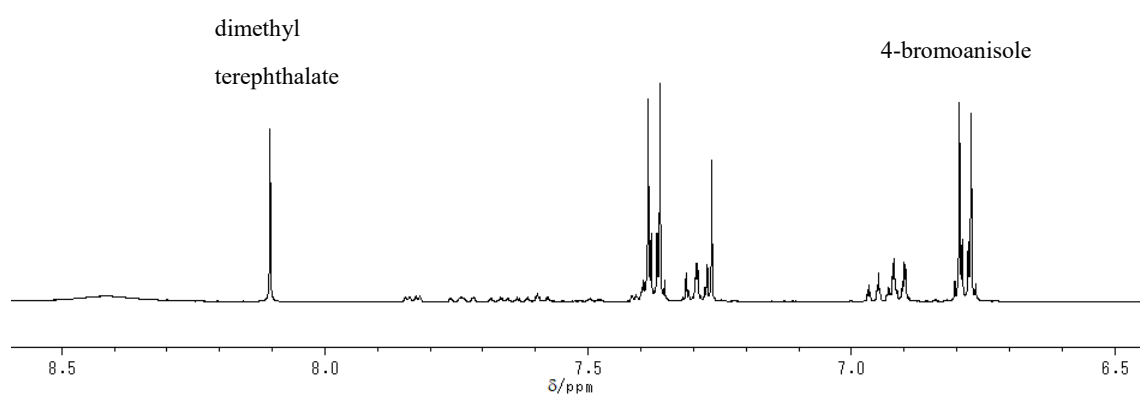

**Figure S55.** <sup>1</sup>H-NMR spectrum of the crude of the bromination reaction with **11** as a catalyst.

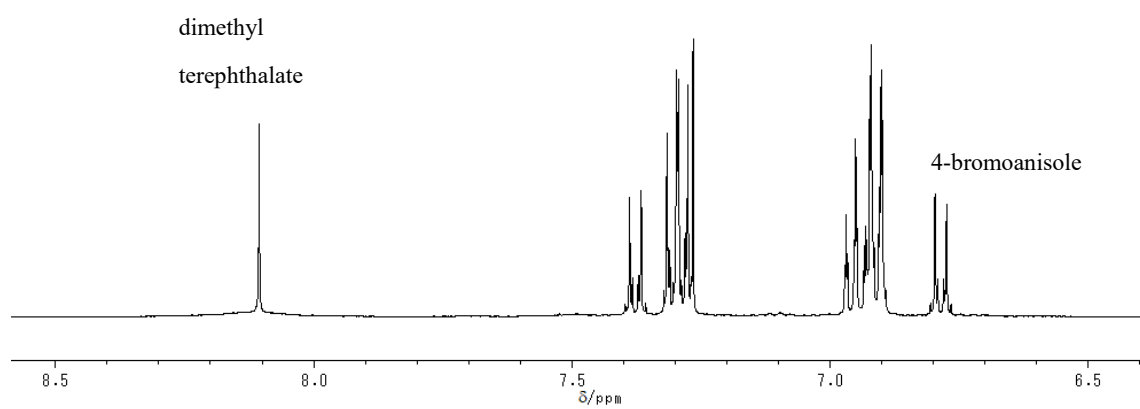

**Figure S56.** <sup>1</sup>H-NMR spectrum of the crude of the bromination reaction with **12** as a catalyst.

## 7. Computational calculations

**Table S18.** Results of DFT and TD-DFT calculations<sup>[a,b]</sup>

|           | HOMO<br>[eV] | LUMO<br>[eV] | $E^{[c]}$<br>[eV] | $f^{[d]}$ |            | HOMO<br>[eV] | LUMO<br>[eV] | $E^{[c]}$<br>[eV] | $f^{[d]}$ |
|-----------|--------------|--------------|-------------------|-----------|------------|--------------|--------------|-------------------|-----------|
| <b>1</b>  | -5.72        | -1.88        | 3.12              | 0.0068    | <b>1'</b>  | -6.22        | -0.86        | 4.63              | 0.1088    |
| <b>2</b>  | -6.45        | -2.99        | 2.80              | 0.0058    | <b>2'</b>  | -7.59        | -2.42        | 4.42              | 0.0055    |
| <b>3</b>  | -5.52        | -1.50        | 3.27              | 0.0125    | <b>3'</b>  | -5.68        | -0.67        | 4.35              | 0.0127    |
| <b>4</b>  | -5.91        | -2.31        | 2.93              | 0.0134    | <b>4'</b>  | -6.21        | -1.39        | 4.29              | 0.0753    |
| <b>5</b>  | -6.15        | -2.66        | 2.83              | 0.0108    | <b>5'</b>  | -6.52        | -1.78        | 4.13              | 0.0004    |
| <b>6</b>  | -6.10        | -2.64        | 2.80              | 0.0154    | <b>6'</b>  | -6.46        | -1.72        | 4.11              | 0.0473    |
| <b>7</b>  | -5.84        | -2.21        | 2.98              | 0.0132    | <b>7'</b>  | -6.10        | -1.32        | 4.21              | 0.0564    |
| <b>8</b>  | -5.97        | -2.51        | 2.84              | 0.0206    | <b>8'</b>  | -5.68        | -1.63        | 3.62              | 0.1871    |
| <b>9</b>  | -5.86        | -1.77        | 3.42              | 0.0117    | <b>9'</b>  | -5.99        | -0.95        | 4.30              | 0.1240    |
| <b>10</b> | -5.67        | -1.98        | 2.92              | 0.0048    | <b>10'</b> | -6.34        | -0.93        | 4.67              | 0.1082    |
| <b>11</b> | -6.17        | -2.28        | 3.25              | 0.0301    | <b>11'</b> | -6.20        | -1.37        | 4.22              | 0.0587    |
| <b>12</b> | -5.76        | -2.34        | 2.76              | 0.0070    | <b>12'</b> | -6.19        | -1.44        | 4.17              | 0.0643    |

[a] The full geometries were optimized based on B3LYP/def2svp, and the single-point calculations were conducted based on B3LYP/def2tzvp.

[b] **2'**: tris(bis(3,5-trifluoromethyl)phenyl)arsine, **3'**: tri(*p*-anisyl)arsine.

[c] Transition energies and [d] oscillator strengths for HOMO-LUMO transitions.

| <u>Dispersion-corrected DFT</u>                                                     | Stabilization<br>energy [kcal/mol] |
|-------------------------------------------------------------------------------------|------------------------------------|
| 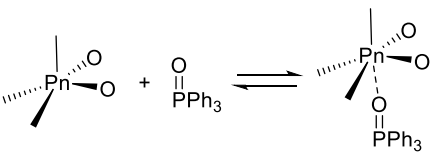 | <b>1</b> 24.5                      |
|                                                                                     | <b>4</b> 24.3                      |
|                                                                                     | <b>5</b> 26.3                      |
|                                                                                     | <b>6</b> 27.1                      |
|                                                                                     | <b>7</b> 23.7                      |
|                                                                                     | <b>8</b> 26.1                      |
|                                                                                     | <b>9</b> 20.2                      |
|                                                                                     | <b>10</b> 31.7                     |
|                                                                                     | <b>11</b> 21.8                     |
|                                                                                     | <b>12</b> 30.1                     |

**Figure S57.** Stabilization energies for the complexation of the tetrachlorocatecholates with O=PPh<sub>3</sub>. The full geometries were optimized based on B3LYP-D3BJ/def2svp, and the single point calculations were conducted based on B3LYP-D3BJ/def2tzvp. The substituents around the Pn atoms are omitted in the scheme for clarity.

**Table S19.** Activation energies of the transition states in the hydrolyses in tetrachlorocatecholates of Pn compounds, given in kcal/mol.<sup>1</sup>

| Pn compounds             | Label     | TS1  | TS2 | TS3  |
|--------------------------|-----------|------|-----|------|
| Triphenylarsine          | <b>1</b>  | 14.7 | 2.0 | –    |
| 9-Phenyl-9-arsafluorene  | <b>4</b>  | 19.1 | 3.9 | 1.8  |
| Triphenylstibine         | <b>10</b> | 14.8 | 0.4 | 13.4 |
| 9-Phenyl-9-stibafluorene | <b>12</b> | 15.3 | 3.3 | 17.8 |

<sup>1</sup> the activation energy (in kcal/mol) of a TS is measured from its reactant species at each elementary step. The activation energy values for the As(V) compounds were obtained at the dispersion-corrected B3LYP/SDD + 6-31G\*\* //B3LYP/6-31G\*\* level, and those for the Sb(V) compounds were at the dispersion corrected B3LYP/SDD + 6-31G\*\* level.

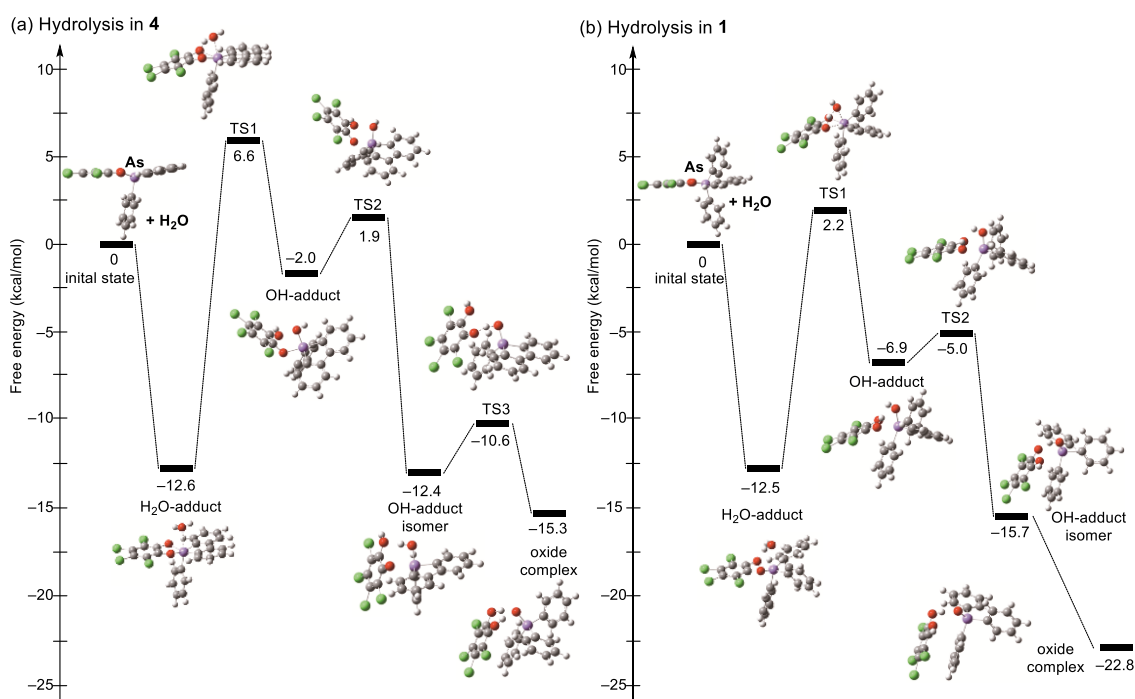

**Figure S58.** Free energy profiles of hydrolysis reactions between an As(V) compound and water molecule at the B3LYP-D3/SDD+6-31G\*\*//B3LYP-D3/6-31G\*\* level: hydrolysis in (a) **4** and (b) **1**. Their optimized geometries were obtained at the B3LYP-D3/6-31G\*\* level, whose energies are shown.

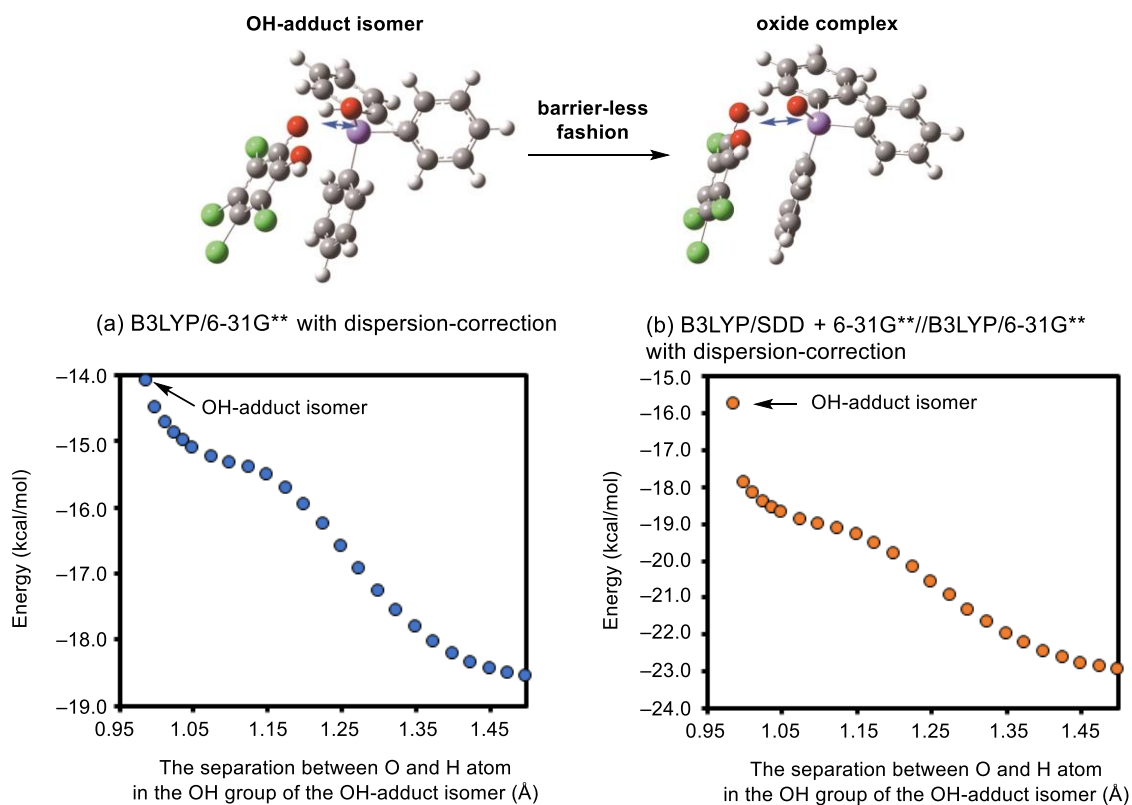

**Figure S59.** (a) The minimum-energy path analysis of hydrolysis of **1** at the dispersion-corrected B3LYP/6-31G\*\* level, confirming that the formation of the oxide complex from the OH-adduct isomer proceeds in a barrier-less fashion. In the analysis, the separation between O and H atoms in the attached OH group in the OH-adduct isomer (the blue arrow) is kept to a certain value from 0.99 to 1.50 Å, but other parameters are fully relaxed. The energy changes by changing the OH separation in the interval of 0.0125 or 0.025 Å are displayed as a function of the OH separation. The same analysis was done at the dispersion-corrected B3LYP/SDD + 6-31G\*\*/B3LYP/6-31G\*\* level, whose graph is given in (b).

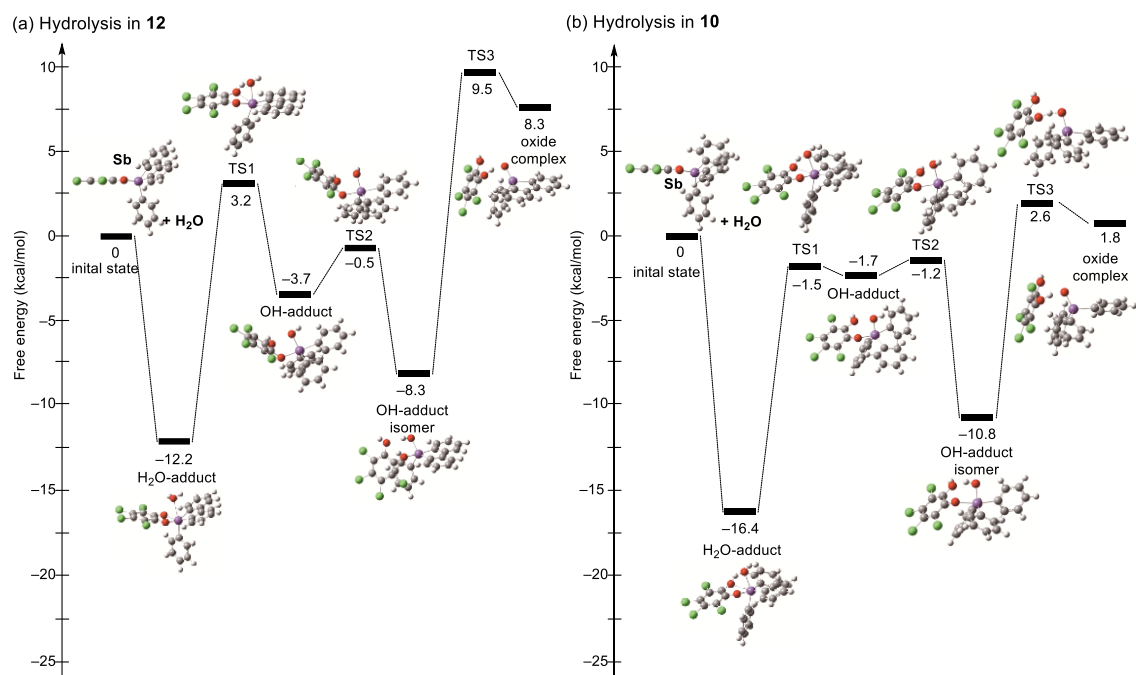

**Figure S60.** Free energy profiles of hydrolysis reactions between an As(V) compound and water molecule at the B3LYP-D3/SDD+6-31G\*\* level: hydrolysis in (a) **12** and (b) **10**. Their optimized geometries were obtained at the B3LYP-D3/6-31G\*\* level, whose energies are shown.

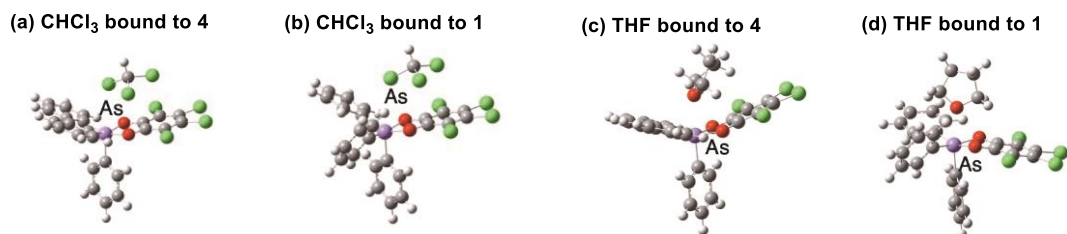

Binding energy: 5.7 kcal/mol    Binding energy: 6.2 kcal/mol    Binding energy: 11.1 kcal/mol    Binding energy: 7.6 kcal/mol

**Figure S61.** Optimized structures for CHCl<sub>3</sub> bound to **4** and **1** given in (a) and (b), respectively, obtained from dispersion-corrected B3LYP-D3/6-31G\*\* level. Basis-set superposition error (BSSE) corrected binding energies are given in kcal/mol. Similarly, optimized structures for THF bound to **4** and **1** given in (c) and (d), respectively, were obtained to compute their binding energies.

**Table S20.**  $\tau_5$  values of **1-12** estimated for the crystal and optimized structures.

|           | Crystal | Optimized by DFT <sup>1</sup> |
|-----------|---------|-------------------------------|
| <b>1</b>  | 0.76    | 0.77                          |
| <b>2</b>  | 0.23    | 0.76                          |
| <b>3</b>  | 0.53    | 0.77                          |
| <b>4</b>  | 0.10    | 0.32                          |
| <b>5</b>  | 0.05    | 0.32                          |
| <b>6</b>  | 0.17    | 0.34                          |
| <b>7</b>  | 0.07    | 0.39                          |
| <b>8</b>  | 0.07    | 0.38                          |
| <b>9</b>  | 0.91    | 0.88                          |
| <b>10</b> | 0.66    | 0.73                          |
| <b>11</b> | 0.02    | 0.10                          |
| <b>12</b> | 0.12    | 0.48                          |

<sup>1</sup> Optimized by DFT calculations (B3LYP/def2svp)

## Cartesian coordinates in the structures optimized by DFT calculations

### A. Optimized by B3LYP/def2svp

1 (S<sub>0</sub>):  $E = -5149.124182$  hartree

| Atom | X        | Y        | Z        |
|------|----------|----------|----------|
| As   | 1.255059 | -0.07723 | -0.00324 |
| Cl   | -5.12866 | 2.135583 | -0.14696 |
| Cl   | -2.18481 | 3.35402  | -0.20227 |
| Cl   | -2.94273 | -2.89462 | 0.002713 |
| Cl   | -5.50524 | -1.0021  | -0.04376 |
| O    | -0.36776 | -1.29594 | -0.11252 |
| O    | -0.06584 | 1.213936 | -0.18292 |
| C    | 2.599709 | 1.388546 | -0.08385 |
| C    | -1.34711 | 0.783664 | -0.15626 |
| C    | 1.627346 | -0.79737 | 1.786176 |
| C    | -1.49709 | -0.6178  | -0.11685 |
| C    | -3.91064 | -0.31305 | -0.08597 |
| C    | -2.78604 | -1.16488 | -0.07137 |
| C    | 2.271395 | 2.748691 | 0.028197 |
| H    | 1.229747 | 3.049805 | 0.132941 |
| C    | -3.74639 | 1.082483 | -0.12963 |
| C    | -2.4465  | 1.635306 | -0.15995 |
| C    | 3.948828 | 1.021609 | -0.22773 |
| H    | 4.228869 | -0.03149 | -0.31972 |
| C    | 1.902493 | -1.12392 | -1.52176 |
| C    | 1.956407 | -2.52382 | -1.46039 |
| H    | 1.655098 | -3.05199 | -0.55488 |
| C    | 1.026103 | -1.99012 | 2.226771 |
| H    | 0.316362 | -2.50796 | 1.583    |
| C    | 2.492327 | -0.09927 | 2.644291 |
| H    | 2.953362 | 0.836226 | 2.32772  |
| C    | 2.263549 | -0.45632 | -2.69935 |
| H    | 2.221967 | 0.633826 | -2.75395 |
| C    | 3.279662 | 3.719656 | -0.00439 |
| H    | 3.011068 | 4.776001 | 0.079014 |



|   |          |          |          |
|---|----------|----------|----------|
| C | 1.315306 | -2.48546 | 3.500695 |
| H | 0.847363 | -3.41532 | 3.833397 |
| C | 2.183388 | -1.79283 | 4.349801 |
| H | 2.399965 | -2.18113 | 5.348298 |
| C | 4.618691 | 3.346728 | -0.14401 |
| H | 5.40194  | 4.108786 | -0.169   |
| C | 4.952882 | 1.993093 | -0.25447 |
| H | 5.9975   | 1.69108  | -0.36576 |
| C | 2.764461 | -0.59658 | 3.922149 |
| H | 3.433364 | -0.04143 | 4.5844   |
| C | 2.680592 | -1.19002 | -3.81458 |
| H | 2.950972 | -0.66733 | -4.73541 |
| C | 2.397354 | -3.24792 | -2.57037 |
| H | 2.45178  | -4.33807 | -2.51687 |
| C | 2.754707 | -2.58375 | -3.74876 |
| H | 3.088397 | -3.15535 | -4.61847 |

---

**2 (S<sub>0</sub>):  $E = -7169.832431$  hartree**

| Atom | X        | Y        | Z        |
|------|----------|----------|----------|
| As   | -0.07699 | -0.07766 | 0.106226 |
| Cl   | -1.96065 | -3.99342 | 2.276192 |
| Cl   | -4.92612 | 1.17922  | 0.252412 |
| Cl   | -6.61037 | -1.18266 | 1.571998 |
| Cl   | -5.12535 | -3.77933 | 2.588309 |
| O    | -0.77454 | -1.52764 | 1.008184 |
| F    | -2.06474 | 1.876193 | -5.78986 |
| O    | -1.95894 | 0.550713 | 0.209783 |
| F    | 4.620525 | -4.634   | 1.168311 |
| F    | 3.177003 | -4.20646 | 2.72513  |
| F    | -2.79047 | 2.52997  | -3.85211 |
| F    | -3.50224 | 0.674871 | -4.70743 |
| F    | -0.62336 | 6.226789 | 1.484769 |
| F    | 2.781607 | -1.73498 | -4.18895 |
| F    | 2.511223 | -5.01128 | 0.832671 |
| F    | 6.313969 | -0.57805 | -0.85342 |

|   |          |          |          |
|---|----------|----------|----------|
| F | 1.127816 | -2.70149 | -5.19595 |
| F | 5.010878 | 1.122747 | -1.19946 |
| F | 0.705903 | 5.915379 | -0.19221 |
| F | 5.833314 | 0.767199 | 0.769995 |
| F | -1.33444 | 5.200984 | -0.29045 |
| F | 2.78934  | 3.933956 | 4.340793 |
| C | -2.76735 | -0.36596 | 0.729424 |
| C | -2.12148 | -1.52906 | 1.179993 |
| C | 1.723643 | -0.9205  | 0.31156  |
| C | -2.82647 | -2.58538 | 1.747479 |
| C | 0.355453 | 1.626712 | 0.974034 |
| C | 1.913844 | -2.22859 | 0.77276  |
| H | 1.057829 | -2.83812 | 1.060124 |
| F | 1.947748 | -0.86713 | -5.99501 |
| C | -4.2287  | -2.47733 | 1.874561 |
| C | -0.19682 | -0.03553 | -1.85835 |
| C | 3.209242 | -2.75813 | 0.864984 |
| C | -4.88798 | -1.31846 | 1.422621 |
| C | -0.13316 | 2.835428 | 0.46134  |
| H | -0.74642 | 2.859703 | -0.43895 |
| C | 2.842352 | -0.15524 | -0.05397 |
| H | 2.726204 | 0.865812 | -0.42462 |
| C | -1.29026 | 0.707263 | -3.88954 |
| C | -4.15771 | -0.26043 | 0.841169 |
| C | -1.22789 | 0.673519 | -2.49313 |
| H | -1.98708 | 1.182551 | -1.90051 |
| C | -0.34841 | 0.022675 | -4.66049 |
| H | -0.39553 | 0.06363  | -5.74965 |
| F | 2.987162 | 1.777863 | 4.189647 |
| C | 4.129474 | -0.68966 | 0.035576 |
| C | 0.740669 | -0.73496 | -2.63033 |
| H | 1.544001 | -1.3025  | -2.16301 |
| C | 1.104214 | 1.614938 | 2.154186 |
| H | 1.493164 | 0.681204 | 2.564143 |
| C | 3.385109 | -4.16363 | 1.398431 |
| C | 4.317827 | -1.9975  | 0.495517 |

|   |          |          |          |
|---|----------|----------|----------|
| H | 5.320569 | -2.42153 | 0.555755 |
| C | 0.163428 | 4.032202 | 1.117104 |
| C | 0.658084 | -0.7088  | -4.0254  |
| F | 1.2662   | 2.643262 | 5.173634 |
| C | -2.41992 | 1.456249 | -4.56532 |
| C | 5.329863 | 0.159873 | -0.31833 |
| C | 0.905521 | 4.026741 | 2.303112 |
| H | 1.122388 | 4.96306  | 2.819184 |
| C | 1.365202 | 2.816468 | 2.823789 |
| C | 1.639397 | -1.50689 | -4.85679 |
| C | -0.28184 | 5.352659 | 0.526153 |
| C | 2.111146 | 2.794207 | 4.140513 |

---

**3 (S<sub>0</sub>):**  $E = -5492.442964$  hartree

| Atom | X        | Y        | Z        |
|------|----------|----------|----------|
| As   | 0.677334 | -0.03999 | 0.073684 |
| Cl   | -2.32097 | 0.553544 | -3.70851 |
| Cl   | -5.38206 | 0.71502  | -2.83905 |
| Cl   | -6.1318  | 0.555022 | 0.229414 |
| Cl   | -3.82092 | 0.237621 | 2.39998  |
| O    | -0.47605 | 0.296928 | -1.34479 |
| O    | -1.07658 | 0.181367 | 1.11412  |
| O    | 1.161898 | -5.79386 | 2.11359  |
| O    | 2.548513 | 4.486094 | 3.72286  |
| O    | 5.386451 | -0.20441 | -3.89575 |
| C    | 2.168034 | -0.04987 | -1.23336 |
| C    | -1.7948  | 0.366586 | -1.06269 |
| C    | -2.11062 | 0.301031 | 0.311673 |
| C    | 1.984768 | -0.112   | -2.62813 |
| H    | 0.977533 | -0.11442 | -3.04332 |
| C    | 0.794469 | -1.86643 | 0.760957 |
| C    | 1.3168   | 1.388134 | 1.231824 |
| C    | -4.4683  | 0.481909 | -0.27069 |
| C    | 2.346588 | 3.580557 | 1.467604 |
| H    | 2.808305 | 4.447513 | 0.99525  |

|   |          |          |          |
|---|----------|----------|----------|
| C | -3.45586 | 0.348198 | 0.702667 |
| C | -4.1386  | 0.550632 | -1.63503 |
| C | 0.004291 | -2.30014 | 1.837987 |
| H | -0.7171  | -1.61757 | 2.285355 |
| C | 3.07849  | -0.16101 | -3.48763 |
| H | 2.942182 | -0.20428 | -4.57025 |
| C | 1.926404 | 2.512529 | 0.667195 |
| H | 2.080935 | 2.573155 | -0.4122  |
| C | -2.78405 | 0.486278 | -2.03278 |
| C | 1.675497 | -2.78639 | 0.15873  |
| H | 2.288349 | -2.48997 | -0.69243 |
| C | 0.106002 | -3.60556 | 2.323405 |
| H | -0.52256 | -3.9047  | 3.162172 |
| C | 1.120107 | 1.341907 | 2.624682 |
| H | 0.620658 | 0.48854  | 3.08422  |
| C | 3.479907 | -0.04022 | -0.73892 |
| H | 3.662999 | 0.008092 | 0.338166 |
| C | 0.994718 | -4.51276 | 1.722883 |
| C | 4.587331 | -0.09426 | -1.59175 |
| H | 5.589794 | -0.08549 | -1.16349 |
| C | 2.169756 | 3.518672 | 2.8585   |
| C | 1.55663  | 2.385569 | 3.42868  |
| H | 1.423194 | 2.359315 | 4.511903 |
| C | 1.773332 | -4.08945 | 0.630242 |
| H | 2.448765 | -4.809   | 0.163431 |
| C | 4.389958 | -0.15376 | -2.98102 |
| C | 0.402896 | -6.30044 | 3.19264  |
| H | 0.606492 | -5.75161 | 4.129088 |
| H | 0.705302 | -7.34813 | 3.320173 |
| H | -0.68064 | -6.26241 | 2.983518 |
| C | 3.146815 | 5.666178 | 3.230001 |
| H | 3.356299 | 6.297454 | 4.1036   |
| H | 2.472668 | 6.21219  | 2.546459 |
| H | 4.095314 | 5.456078 | 2.704097 |
| C | 6.728984 | -0.20414 | -3.46258 |
| H | 6.980684 | 0.715402 | -2.90413 |

|   |          |          |          |
|---|----------|----------|----------|
| H | 7.349192 | -0.25114 | -4.36759 |
| H | 6.956335 | -1.07924 | -2.82754 |

---

**4 (S<sub>0</sub>):**  $E = -5147.942239$  hartree

---

| Atom | X        | Y        | Z        |
|------|----------|----------|----------|
| As   | -1.16029 | -0.03864 | 0.034299 |
| Cl   | 2.788254 | -3.00975 | -0.37689 |
| Cl   | 5.470349 | -1.28586 | -0.49958 |
| Cl   | 5.293    | 1.870304 | -0.45242 |
| Cl   | 2.438557 | 3.276442 | -0.28635 |
| O    | 0.330246 | -1.2577  | -0.27288 |
| O    | 0.184739 | 1.262983 | -0.22143 |
| C    | -2.30226 | -1.2436  | -0.99838 |
| C    | -2.05369 | -2.57592 | -1.32777 |
| C    | -3.03622 | -3.2971  | -2.0167  |
| C    | -4.24247 | -2.67971 | -2.36569 |
| C    | -4.47879 | -1.33954 | -2.04407 |
| C    | -3.50262 | -0.60154 | -1.36046 |
| C    | -3.6018  | 0.837227 | -0.9978  |
| C    | -4.67459 | 1.684501 | -1.31054 |
| C    | -4.61618 | 3.037564 | -0.96351 |
| C    | -3.49182 | 3.560001 | -0.314   |
| C    | -2.41751 | 2.721457 | 0.008433 |
| C    | -2.48892 | 1.367009 | -0.31876 |
| C    | -1.30044 | -0.40455 | 1.942525 |
| C    | -2.15298 | 0.368915 | 2.744615 |
| C    | -2.26347 | 0.093983 | 4.110728 |
| C    | -1.52681 | -0.94874 | 4.679352 |
| C    | -0.67744 | -1.71932 | 3.879619 |
| C    | -0.56076 | -1.4527  | 2.512972 |
| C    | 1.507087 | -0.63696 | -0.31327 |
| C    | 1.432696 | 0.770236 | -0.28347 |
| C    | 2.588951 | 1.546848 | -0.32638 |
| C    | 3.847396 | 0.908896 | -0.39722 |
| C    | 3.926043 | -0.49478 | -0.42037 |

|   |          |          |          |
|---|----------|----------|----------|
| C | 2.748948 | -1.27185 | -0.37245 |
| H | -1.10124 | -3.035   | -1.06056 |
| H | -2.85696 | -4.34087 | -2.28568 |
| H | -5.00704 | -3.2464  | -2.90318 |
| H | -5.42275 | -0.87373 | -2.33486 |
| H | -5.55259 | 1.299844 | -1.83392 |
| H | -5.45286 | 3.69445  | -1.21457 |
| H | -3.44756 | 4.623437 | -0.06631 |
| H | -1.52604 | 3.121664 | 0.495507 |
| H | -2.73256 | 1.185747 | 2.311744 |
| H | -2.92796 | 0.700263 | 4.731339 |
| H | -1.61382 | -1.16064 | 5.748063 |
| H | -0.09849 | -2.53473 | 4.320305 |
| H | 0.102844 | -2.05275 | 1.889455 |

---

**5 (S<sub>0</sub>):  $E = -5821.512401$  hartree**

| Atom | X        | Y        | Z        |
|------|----------|----------|----------|
| As   | -0.50914 | -1.09261 | 0.359392 |
| Cl   | 3.464177 | 0.936059 | 2.514784 |
| Cl   | 2.856234 | -1.77638 | -3.13441 |
| Cl   | 5.665047 | -0.53087 | -2.29032 |
| Cl   | 5.972736 | 0.828562 | 0.545993 |
| F    | -5.23967 | 2.120362 | -1.38252 |
| O    | 0.781784 | -1.47396 | -0.95614 |
| O    | 1.033636 | -0.39418 | 1.311768 |
| F    | -4.13699 | 1.183059 | -2.99011 |
| F    | -4.0931  | 3.339489 | -2.75215 |
| F    | 0.607118 | 4.183876 | 1.200162 |
| F    | -0.91001 | 5.406404 | 0.245692 |
| F    | -1.3015  | 4.494714 | 2.168298 |
| C    | 4.318082 | -0.46795 | -1.19716 |
| C    | 4.455428 | 0.135875 | 0.066121 |
| C    | 3.080222 | -1.02611 | -1.58544 |
| C    | -1.21614 | -1.76039 | 2.05271  |
| C    | 3.357451 | 0.188265 | 0.950941 |

|   |          |          |          |
|---|----------|----------|----------|
| C | 2.138743 | -0.37189 | 0.564483 |
| C | -2.27001 | -2.6668  | 1.823495 |
| C | -1.71972 | -2.34952 | -0.54083 |
| C | 2.003677 | -0.97084 | -0.70224 |
| C | -2.54142 | -2.99903 | 0.399455 |
| C | -2.34811 | 0.790508 | -0.90854 |
| H | -2.77468 | -0.08852 | -1.39263 |
| C | -0.81614 | -1.40568 | 3.340974 |
| H | 0.024642 | -0.72607 | 3.484623 |
| C | -1.26043 | 0.670677 | -0.03516 |
| C | -2.88963 | 2.051306 | -1.17913 |
| C | -1.26688 | 3.070277 | 0.288473 |
| C | -1.81462 | -2.62955 | -1.90448 |
| H | -1.13791 | -2.14786 | -2.61313 |
| C | -0.71719 | 1.814275 | 0.564693 |
| H | 0.138409 | 1.725526 | 1.234995 |
| C | -2.77359 | -3.5494  | -2.3467  |
| H | -2.85831 | -3.77955 | -3.41144 |
| C | -1.50094 | -1.95009 | 4.43398  |
| H | -1.20023 | -1.68613 | 5.450637 |
| C | -2.56395 | -2.8354  | 4.223718 |
| H | -3.09606 | -3.25751 | 5.079929 |
| C | -2.34979 | 3.194657 | -0.58522 |
| H | -2.76158 | 4.178778 | -0.81221 |
| C | -2.94914 | -3.19703 | 2.928857 |
| H | -3.77465 | -3.89778 | 2.787933 |
| C | -3.61526 | -4.18012 | -1.42345 |
| H | -4.3626  | -4.8974  | -1.77171 |
| C | -3.50126 | -3.91419 | -0.05547 |
| H | -4.15556 | -4.43053 | 0.650102 |
| C | -4.09391 | 2.17446  | -2.08525 |
| C | -0.70965 | 4.297339 | 0.97626  |

---

**6 (S<sub>0</sub>):**  $E = -5643.695845$  hartree

---

| Atom | X | Y | Z |
|------|---|---|---|
|------|---|---|---|

---

---

|    |          |          |          |
|----|----------|----------|----------|
| As | 0.937338 | -0.59531 | 0.158105 |
| Cl | -5.61586 | -1.02752 | -1.33605 |
| Cl | -2.84496 | -1.87317 | -2.6639  |
| Cl | -2.855   | 0.858138 | 3.01013  |
| Cl | -5.61905 | 0.340539 | 1.51172  |
| F  | 0.922468 | 0.782061 | -2.67226 |
| O  | -0.48813 | -1.19922 | -0.89575 |
| F  | 1.862718 | 5.215742 | -1.48132 |
| F  | 1.323053 | 3.337448 | -3.37822 |
| F  | 2.006087 | 4.505236 | 1.141562 |
| F  | 1.606044 | 1.960616 | 1.877001 |
| O  | -0.4927  | -0.09788 | 1.372041 |
| C  | -4.12187 | -0.7365  | -0.50087 |
| C  | 2.167363 | -1.64798 | -0.95954 |
| C  | 4.166109 | -3.15769 | -2.1677  |
| H  | 4.953817 | -3.746   | -2.64502 |
| C  | -1.70888 | -0.87075 | -0.42841 |
| C  | -2.90227 | -1.114   | -1.10446 |
| C  | 3.164436 | -1.82248 | 1.271092 |
| C  | 4.09128  | -2.23615 | 2.238131 |
| H  | 4.981709 | -2.79703 | 1.947241 |
| C  | -4.122   | -0.1255  | 0.766414 |
| C  | 1.798899 | -0.80931 | 3.03663  |
| H  | 0.902132 | -0.26306 | 3.328479 |
| C  | 1.271571 | 1.264538 | -0.37205 |
| C  | 2.065248 | -1.95484 | -2.31657 |
| H  | 1.203866 | -1.61833 | -2.89304 |
| C  | 1.196324 | 1.662726 | -1.71194 |
| C  | 3.239816 | -2.12468 | -0.18206 |
| C  | 2.035735 | -1.09322 | 1.691332 |
| C  | 3.074992 | -2.71254 | -2.92175 |
| H  | 3.005153 | -2.96116 | -3.98348 |
| C  | 4.250333 | -2.87293 | -0.8018  |
| H  | 5.097746 | -3.24759 | -0.22393 |
| C  | -1.70232 | -0.25578 | 0.838329 |
| C  | 3.870111 | -1.94225 | 3.586814 |



|   |          |          |          |
|---|----------|----------|----------|
| H | 4.594699 | -2.27433 | 4.334631 |
| C | 2.728147 | -1.24016 | 3.98939  |
| H | 2.558972 | -1.02901 | 5.047868 |
| C | 1.670725 | 3.954819 | -1.12745 |
| C | 1.533755 | 2.255865 | 0.583162 |
| C | 1.398636 | 2.989572 | -2.09947 |
| C | -2.90645 | 0.115344 | 1.441845 |
| C | 1.74465  | 3.587686 | 0.218664 |

---

7 (S<sub>0</sub>):  $E = -5262.382315$  hartree

| Atom | X        | Y        | Z        |
|------|----------|----------|----------|
| As   | 1.053519 | -0.39719 | 0.106534 |
| Cl   | -2.85593 | 1.024185 | 2.826852 |
| Cl   | -5.46124 | -1.12436 | -1.49704 |
| Cl   | -5.57416 | 0.345866 | 1.299884 |
| Cl   | -2.63435 | -1.90674 | -2.74153 |
| O    | -0.34156 | -1.10544 | -0.94495 |
| O    | -0.43725 | 0.061713 | 1.295772 |
| O    | 2.273554 | 5.349869 | -1.54138 |
| C    | 2.30915  | -1.46639 | -0.96695 |
| C    | 3.217229 | -1.68519 | 1.293754 |
| C    | 2.080385 | -0.94588 | 1.67568  |
| C    | 1.407606 | 1.439417 | -0.40506 |
| C    | 0.749989 | 2.498097 | 0.237034 |
| H    | 0.022227 | 2.287886 | 1.021383 |
| C    | -4.04616 | -0.10111 | 0.604325 |
| C    | 3.337732 | -1.98362 | -0.15795 |
| C    | -1.62381 | -0.16181 | 0.740685 |
| C    | -1.57882 | -0.81028 | -0.51055 |
| C    | -2.85323 | 0.201151 | 1.294988 |
| C    | -3.99621 | -0.75294 | -0.64026 |
| C    | 1.949481 | 4.107013 | -1.12626 |
| C    | 4.113703 | -2.09864 | 2.288914 |
| H    | 5.007329 | -2.669   | 2.026742 |
| C    | 1.815437 | -0.64319 | 3.011107 |

|   |          |          |          |
|---|----------|----------|----------|
| H | 0.91082  | -0.09445 | 3.27533  |
| C | 1.01379  | 3.823154 | -0.11729 |
| H | 0.48305  | 4.6228   | 0.399311 |
| C | 2.25711  | -1.7421  | -2.33353 |
| H | 1.427091 | -1.36938 | -2.93745 |
| C | 4.349148 | -2.75357 | -0.75049 |
| H | 5.161171 | -3.16458 | -0.14672 |
| C | -2.75019 | -1.10895 | -1.20323 |
| C | 2.613152 | 3.045696 | -1.76997 |
| H | 3.336648 | 3.28383  | -2.55204 |
| C | 2.345165 | 1.729916 | -1.41413 |
| H | 2.872682 | 0.925669 | -1.92912 |
| C | 1.645713 | 6.47014  | -0.95162 |
| H | 1.855381 | 6.533553 | 0.130767 |
| H | 0.552239 | 6.453286 | -1.10455 |
| H | 2.061975 | 7.35643  | -1.44814 |
| C | 3.861498 | -1.78804 | 3.62876  |
| H | 4.563486 | -2.11866 | 4.398533 |
| C | 2.717555 | -1.06931 | 3.993261 |
| H | 2.523816 | -0.84402 | 5.044789 |
| C | 4.312136 | -3.0115  | -2.12397 |
| H | 5.100042 | -3.61637 | -2.57995 |
| C | 3.268577 | -2.51689 | -2.91481 |
| H | 3.237649 | -2.74221 | -3.98371 |

---

**8 (S<sub>0</sub>):**  $E = -5789.336376$  hartree

| Atom | X        | Y        | Z        |
|------|----------|----------|----------|
| As   | -1.0547  | -0.07121 | 0.140547 |
| Cl   | 5.349209 | 1.968209 | -0.33372 |
| Cl   | 2.489064 | 3.301613 | 0.096828 |
| S    | -4.36933 | -1.34134 | -2.39114 |
| Cl   | 5.559329 | -1.15721 | -0.75536 |
| S    | -4.69282 | 2.126364 | -0.94295 |
| Cl   | 2.904287 | -2.92485 | -0.74037 |
| O    | 0.259491 | 1.262799 | 0.016671 |

|   |          |          |          |
|---|----------|----------|----------|
| O | 0.430944 | -1.2355  | -0.33897 |
| C | -3.33865 | -0.41683 | -1.35716 |
| C | -2.41735 | 1.350386 | 0.004396 |
| C | -3.47016 | 0.912345 | -0.77928 |
| C | 1.511946 | 0.79568  | -0.14938 |
| C | -2.16857 | -1.10247 | -1.07734 |
| C | 4.010592 | -0.4053  | -0.52718 |
| C | 2.655902 | 1.590971 | -0.14641 |
| C | 3.917615 | 0.98489  | -0.33739 |
| C | 1.599421 | -0.59724 | -0.34659 |
| C | -2.08842 | -2.37618 | -1.70363 |
| H | -1.23437 | -3.04743 | -1.61674 |
| C | -1.18469 | -0.70014 | 1.97675  |
| C | -2.58631 | 2.684737 | 0.465836 |
| H | -1.85731 | 3.225719 | 1.070165 |
| C | -3.21319 | -2.64348 | -2.44667 |
| H | -3.43563 | -3.5297  | -3.03963 |
| C | 2.845453 | -1.20125 | -0.52711 |
| C | -2.01639 | -0.03207 | 2.887736 |
| H | -2.58629 | 0.845452 | 2.578044 |
| C | -3.77641 | 3.229361 | 0.040305 |
| H | -4.16962 | 4.226376 | 0.235284 |
| C | -0.45663 | -1.82893 | 2.384944 |
| H | 0.191497 | -2.34371 | 1.674807 |
| C | -0.5657  | -2.2822  | 3.702078 |
| H | 0.002765 | -3.16039 | 4.018079 |
| C | -1.3944  | -1.61742 | 4.611134 |
| H | -1.47499 | -1.97529 | 5.64071  |
| C | -2.11838 | -0.49355 | 4.203122 |
| H | -2.76595 | 0.030233 | 4.910574 |

---

**9 (S<sub>0</sub>):**  $E = -3254.770857$  hartree

| Atom | X        | Y        | Z        |
|------|----------|----------|----------|
| Cl   | -4.94837 | 2.154765 | -0.00329 |
| Cl   | -1.98242 | 3.332298 | -0.01196 |

|    |          |          |          |
|----|----------|----------|----------|
| Cl | -2.84095 | -2.91436 | -0.05435 |
| Cl | -5.37012 | -0.97602 | -0.02596 |
| O  | -0.22232 | -1.30346 | -0.07972 |
| O  | 0.108809 | 1.114985 | -0.06083 |
| C  | 2.633301 | 1.246413 | -0.03007 |
| C  | -1.20252 | 0.741387 | -0.05028 |
| C  | 1.723772 | -0.85796 | 1.635769 |
| C  | -1.36306 | -0.65264 | -0.06136 |
| C  | -3.76502 | -0.31309 | -0.03481 |
| C  | -2.65707 | -1.18828 | -0.05076 |
| C  | 2.383873 | 2.623718 | 0.09024  |
| H  | 1.361155 | 2.982806 | 0.198492 |
| C  | -3.58202 | 1.082318 | -0.02417 |
| C  | -2.27398 | 1.620133 | -0.0291  |
| C  | 3.967204 | 0.820857 | -0.17563 |
| H  | 4.194697 | -0.24382 | -0.27648 |
| C  | 1.828614 | -0.93969 | -1.5347  |
| C  | 2.13391  | -2.30833 | -1.57712 |
| H  | 2.088726 | -2.91459 | -0.67163 |
| C  | 1.354382 | -2.18082 | 1.956506 |
| H  | 0.777788 | -2.76956 | 1.246191 |
| C  | 2.394289 | -0.09205 | 2.607759 |
| H  | 2.678839 | 0.938297 | 2.39682  |
| C  | 1.881055 | -0.18096 | -2.71402 |
| H  | 1.654659 | 0.887689 | -2.69136 |
| C  | 3.439384 | 3.544174 | 0.066544 |
| H  | 3.222988 | 4.611859 | 0.157797 |
| C  | 1.689158 | -2.72714 | 3.196542 |
| H  | 1.406646 | -3.75849 | 3.421698 |
| C  | 2.358677 | -1.95754 | 4.152368 |
| H  | 2.606513 | -2.3852  | 5.127258 |
| C  | 4.75748  | 3.106677 | -0.07361 |
| H  | 5.578923 | 3.827612 | -0.09208 |
| C  | 5.019343 | 1.737555 | -0.19406 |
| H  | 6.046727 | 1.381911 | -0.30722 |
| C  | 2.697699 | -0.63519 | 3.858807 |

|   |          |          |          |
|---|----------|----------|----------|
| H | 3.20588  | -0.0181  | 4.603753 |
| C | 2.226063 | -0.78826 | -3.92423 |
| H | 2.252198 | -0.19202 | -4.83967 |
| C | 2.506254 | -2.90329 | -2.78487 |
| H | 2.757194 | -3.96671 | -2.80695 |
| C | 2.546296 | -2.14803 | -3.96101 |
| H | 2.827018 | -2.6199  | -4.90593 |
| P | 1.298473 | -0.0865  | 0.007993 |

---

**10 (S<sub>0</sub>):  $E = -3153.808578$  hartree**

| Atom | X        | Y        | Z        |
|------|----------|----------|----------|
| Sb   | -1.23826 | -0.10426 | -6.8E-05 |
| Cl   | 5.674598 | -0.96571 | -0.00019 |
| Cl   | 3.097473 | -2.83941 | 0.000533 |
| Cl   | 2.379608 | 3.410441 | -0.00249 |
| Cl   | 5.312162 | 2.176728 | -0.00172 |
| O    | 0.249062 | 1.32228  | -0.00176 |
| O    | 0.552055 | -1.27791 | -0.00064 |
| C    | 1.508833 | 0.852778 | -0.0015  |
| C    | -1.77317 | -1.09302 | 1.842993 |
| C    | 1.663843 | -0.55466 | -0.00086 |
| C    | -1.77578 | -1.09614 | -1.8407  |
| C    | 2.627523 | 1.68833  | -0.00173 |
| C    | 4.083915 | -0.26526 | -0.00068 |
| C    | -2.65107 | 1.555915 | -0.00053 |
| C    | 3.923862 | 1.130784 | -0.00135 |
| C    | 2.951955 | -1.10505 | -0.00039 |
| C    | -2.75259 | -0.53788 | -2.67773 |
| H    | -3.24447 | 0.400748 | -2.41632 |
| C    | -2.74887 | -0.53344 | 2.680429 |
| H    | -3.24123 | 0.404675 | 2.418084 |
| C    | -4.53174 | 3.641495 | -0.00107 |
| H    | -5.26233 | 4.454506 | -0.0013  |
| C    | -4.0279  | 1.272694 | 0.000621 |
| H    | -4.38839 | 0.239396 | 0.00176  |

|   |          |          |          |
|---|----------|----------|----------|
| C | -1.13083 | -2.28886 | -2.20572 |
| H | -0.33921 | -2.6969  | -1.57641 |
| C | -1.12758 | -2.28505 | 2.209127 |
| H | -0.33678 | -2.69406 | 1.579405 |
| C | -3.0963  | -1.18249 | -3.87094 |
| H | -3.85433 | -0.74214 | -4.52367 |
| C | -4.96455 | 2.311968 | 0.000353 |
| H | -6.0329  | 2.080313 | 0.001261 |
| C | -2.46891 | -2.37902 | -4.22786 |
| H | -2.73924 | -2.88086 | -5.16048 |
| C | -2.22146 | 2.892211 | -0.00193 |
| H | -1.15535 | 3.120931 | -0.00277 |
| C | -1.48699 | -2.92786 | -3.39691 |
| H | -0.98523 | -3.85675 | -3.67979 |
| C | -3.1637  | 3.927472 | -0.0022  |
| H | -2.82144 | 4.965674 | -0.00329 |
| C | -1.48199 | -2.92206 | 3.401898 |
| H | -0.97975 | -3.85042 | 3.685659 |
| C | -3.09083 | -1.17606 | 3.875213 |
| H | -3.84799 | -0.73469 | 4.528267 |
| C | -2.46281 | -2.37191 | 4.233288 |
| H | -2.73178 | -2.8722  | 5.167126 |

---

**11 (S<sub>0</sub>):  $E = -3253.592690$  hartree**

| Atom | X        | Y        | Z        |
|------|----------|----------|----------|
| C    | -2.19005 | -2.65765 | -0.88425 |
| C    | -2.38781 | -1.2793  | -0.75268 |
| C    | -3.62827 | -0.70512 | -1.09151 |
| C    | -4.67846 | -1.52007 | -1.53081 |
| C    | -4.48154 | -2.89893 | -1.64687 |
| C    | -3.24199 | -3.46559 | -1.33159 |
| C    | -3.65827 | 0.767819 | -0.9612  |
| C    | -2.44578 | 1.318134 | -0.5058  |
| C    | -2.29705 | 2.705561 | -0.40373 |
| C    | -3.37326 | 3.541476 | -0.72531 |

|    |          |          |          |
|----|----------|----------|----------|
| C  | -4.58743 | 2.992665 | -1.15253 |
| C  | -4.73359 | 1.60808  | -1.27569 |
| C  | -1.27686 | -0.16121 | 1.75131  |
| C  | -0.70914 | -1.28424 | 2.379911 |
| C  | -0.75802 | -1.41435 | 3.769395 |
| C  | -1.37036 | -0.42855 | 4.54865  |
| C  | -1.93344 | 0.691292 | 3.931445 |
| C  | -1.8889  | 0.826096 | 2.541273 |
| C  | 1.308421 | 0.743598 | -0.35678 |
| C  | 1.339358 | -0.65656 | -0.38432 |
| C  | 2.546398 | -1.34713 | -0.40977 |
| C  | 3.749326 | -0.60517 | -0.42026 |
| C  | 3.717341 | 0.801964 | -0.40031 |
| C  | 2.481997 | 1.489647 | -0.36856 |
| O  | 0.05406  | 1.217686 | -0.34192 |
| O  | 0.111183 | -1.1866  | -0.39279 |
| Cl | 2.387196 | 3.221398 | -0.33906 |
| Cl | 5.196243 | 1.710748 | -0.40954 |
| Cl | 5.267128 | -1.44689 | -0.44931 |
| Cl | 2.523208 | -3.08288 | -0.41722 |
| H  | -1.21952 | -3.09584 | -0.65366 |
| H  | -5.64641 | -1.08569 | -1.79031 |
| H  | -5.29938 | -3.53507 | -1.99493 |
| H  | -3.08971 | -4.54231 | -1.43954 |
| H  | -1.34459 | 3.130327 | -0.08571 |
| H  | -3.25991 | 4.625726 | -0.64924 |
| H  | -5.42427 | 3.649525 | -1.40343 |
| H  | -5.68024 | 1.19097  | -1.62617 |
| H  | -0.22101 | -2.05421 | 1.781651 |
| H  | -0.31183 | -2.2916  | 4.244429 |
| H  | -1.40692 | -0.53252 | 5.636075 |
| H  | -2.41176 | 1.468156 | 4.533093 |
| H  | -2.33536 | 1.7052   | 2.075846 |
| P  | -1.20273 | -0.00643 | -0.08088 |

---

**12 (S<sub>0</sub>): E = -3152.616760 hartree**

| Atom | X        | Y        | Z        |
|------|----------|----------|----------|
| Sb   | 1.124843 | -0.09881 | 0.132597 |
| Cl   | -3.051   | -2.81681 | -0.8617  |
| Cl   | -5.68083 | -1.0218  | -0.76893 |
| Cl   | -2.55331 | 3.337056 | 0.330161 |
| Cl   | -5.42766 | 2.072509 | -0.16951 |
| O    | -0.56887 | -1.24354 | -0.3825  |
| O    | -0.355   | 1.333828 | 0.135285 |
| C    | -1.59248 | 0.84508  | -0.06626 |
| C    | -1.70206 | -0.53976 | -0.34546 |
| C    | 2.649177 | 1.418914 | 0.040218 |
| C    | 1.319889 | -1.03161 | 2.04885  |
| C    | -4.1211  | -0.30336 | -0.50282 |
| C    | 2.252184 | -0.95393 | -1.46336 |
| C    | 3.411671 | -0.1901  | -1.71162 |
| C    | -2.96481 | -1.10732 | -0.55232 |
| C    | -4.0087  | 1.071344 | -0.23382 |
| C    | 3.620645 | 1.064429 | -0.92101 |
| C    | -2.7384  | 1.643945 | -0.01346 |
| C    | 4.286907 | -0.6437  | -2.71213 |
| H    | 5.199657 | -0.09076 | -2.94178 |
| C    | 1.945499 | -2.10502 | -2.18766 |
| H    | 1.020682 | -2.6488  | -1.98227 |
| C    | 4.715778 | 1.924865 | -1.10502 |
| H    | 5.491069 | 1.686435 | -1.83564 |
| C    | 2.745891 | 2.603024 | 0.771769 |
| H    | 1.966666 | 2.875992 | 1.487876 |
| C    | 2.830036 | -2.53505 | -3.18342 |
| H    | 2.607129 | -3.4336  | -3.76384 |
| C    | 2.298704 | -0.58167 | 2.946418 |
| H    | 2.962411 | 0.245313 | 2.682018 |
| C    | 3.841069 | 3.451751 | 0.570525 |
| H    | 3.923711 | 4.383722 | 1.135163 |
| C    | 4.82277  | 3.104193 | -0.36281 |
| H    | 5.679593 | 3.76351  | -0.52291 |



|   |          |          |          |
|---|----------|----------|----------|
| C | 0.467668 | -2.09126 | 2.392524 |
| H | -0.29074 | -2.43438 | 1.685728 |
| C | 1.577507 | -2.25563 | 4.542924 |
| H | 1.677126 | -2.73458 | 5.520319 |
| C | 2.424632 | -1.19891 | 4.194953 |
| H | 3.185981 | -0.85038 | 4.897358 |
| C | 0.602462 | -2.69994 | 3.644051 |
| H | -0.05991 | -3.52543 | 3.916624 |
| C | 3.996562 | -1.8049  | -3.43475 |
| H | 4.689087 | -2.13864 | -4.21166 |

---

**1'** (S<sub>0</sub>):  $E = -2930.086636$  hartree

| Atom | X        | Y        | Z        |
|------|----------|----------|----------|
| As   | -0.00021 | -0.00028 | -1.20347 |
| C    | 1.157531 | -1.31083 | -0.27798 |
| C    | 1.248407 | -2.59237 | -0.8472  |
| C    | 1.911303 | -1.02618 | 0.870964 |
| C    | 2.059858 | -3.57417 | -0.27133 |
| H    | 0.680867 | -2.82858 | -1.75278 |
| C    | 2.730161 | -2.00654 | 1.443037 |
| H    | 1.86303  | -0.0338  | 1.325099 |
| C    | 2.804568 | -3.28201 | 0.875846 |
| H    | 2.11644  | -4.56763 | -0.72442 |
| H    | 3.312734 | -1.77035 | 2.337761 |
| H    | 3.445249 | -4.04604 | 1.323943 |
| C    | 0.556538 | 1.657879 | -0.27879 |
| C    | -0.07093 | 2.17281  | 0.865928 |
| C    | 1.62555  | 2.373171 | -0.84471 |
| C    | 0.369215 | 3.372339 | 1.437207 |
| H    | -0.90988 | 1.638263 | 1.317391 |
| C    | 2.07064  | 3.566924 | -0.26955 |
| H    | 2.117164 | 1.996363 | -1.7471  |
| C    | 1.441214 | 4.07022  | 0.873482 |
| H    | -0.12984 | 3.762256 | 2.328624 |
| H    | 2.906349 | 4.109295 | -0.71997 |

|   |          |          |          |
|---|----------|----------|----------|
| H | 1.783005 | 5.007187 | 1.321002 |
| C | -1.71428 | -0.34714 | -0.27824 |
| C | -2.86932 | 0.215364 | -0.84754 |
| C | -1.84509 | -1.14261 | 0.870412 |
| C | -4.12549 | 0.003648 | -0.272   |
| H | -2.7898  | 0.825208 | -1.75293 |
| C | -3.10372 | -1.36148 | 1.442126 |
| H | -0.96175 | -1.59739 | 1.324586 |
| C | -4.24525 | -0.78773 | 0.874878 |
| H | -5.01394 | 0.451722 | -0.72513 |
| H | -3.1908  | -1.98443 | 2.336591 |
| H | -5.2274  | -0.9605  | 1.322696 |

---

**2'** (S<sub>0</sub>):  $E = -4950.803082$  hartree

| Atom | X        | Y        | Z        |
|------|----------|----------|----------|
| As   | -0.00276 | 0.000319 | -1.74795 |
| F    | -1.89431 | 6.173019 | -1.20249 |
| F    | 6.335824 | -0.46943 | -0.56261 |
| F    | 5.710544 | -1.59385 | -2.30069 |
| F    | -3.46966 | 4.724956 | -0.88641 |
| F    | -2.36844 | 4.725721 | -2.74803 |
| F    | -4.95815 | -1.41797 | 2.354058 |
| F    | 1.420871 | 2.717632 | 2.895029 |
| F    | 5.32107  | 0.531756 | -2.19856 |
| F    | 3.799617 | -2.76964 | 2.874155 |
| F    | 2.362598 | 4.276308 | 1.728477 |
| F    | 1.64849  | -2.49434 | 2.946553 |
| F    | -3.0102  | -1.32222 | 3.290708 |
| F    | 2.494344 | -4.12757 | 1.809377 |
| F    | -3.80409 | 0.418203 | 2.281786 |
| F    | -3.66484 | -5.21234 | -0.56544 |
| C    | 1.597289 | -0.69797 | -0.81349 |
| C    | -1.40775 | -1.0295  | -0.80609 |
| C    | 2.841419 | -0.4099  | -1.39544 |
| H    | 2.899937 | 0.190683 | -2.30662 |

|   |          |          |          |
|---|----------|----------|----------|
| F | 0.554613 | 4.70631  | 2.836015 |
| C | -0.1937  | 1.739081 | -0.82026 |
| C | 4.023141 | -0.87876 | -0.81422 |
| C | -2.06267 | -0.59394 | 0.352454 |
| H | -1.80169 | 0.360367 | 0.813053 |
| C | 1.555874 | -1.47957 | 0.347429 |
| H | 0.603143 | -1.71816 | 0.823227 |
| C | -1.24858 | 3.931101 | -0.82461 |
| C | -1.06935 | 2.66931  | -1.40008 |
| H | -1.61625 | 2.41963  | -2.31286 |
| C | -0.53627 | 4.28977  | 0.323294 |
| H | -0.66718 | 5.277583 | 0.766372 |
| F | -2.22954 | -4.88088 | -2.15878 |
| C | 2.741259 | -1.95539 | 0.922601 |
| C | 0.516806 | 2.101989 | 0.330774 |
| H | 1.205341 | 1.399477 | 0.803294 |
| C | -1.7867  | -2.25122 | -1.3828  |
| H | -1.29841 | -2.60811 | -2.29314 |
| C | 5.355828 | -0.59651 | -1.47118 |
| C | 3.977663 | -1.65252 | 0.349516 |
| H | 4.899529 | -2.00883 | 0.810645 |
| C | -3.06883 | -1.37635 | 0.93285  |
| C | 0.348729 | 3.372897 | 0.89444  |
| F | -4.23958 | -4.09959 | -2.32862 |
| C | -2.2479  | 4.89678  | -1.42127 |
| C | 2.672797 | -2.8385  | 2.148739 |
| C | -3.4376  | -2.59509 | 0.359791 |
| H | -4.22366 | -3.20045 | 0.812578 |
| C | -2.79286 | -3.02928 | -0.80209 |
| C | 1.172646 | 3.770724 | 2.098769 |
| C | -3.71873 | -0.92093 | 2.220436 |
| C | -3.23121 | -4.31577 | -1.46537 |

---

**3'** (S<sub>0</sub>):  $E = -3273.401243$  hartree

---

| Atom | X | Y | Z |
|------|---|---|---|
|------|---|---|---|

---

---

|    |          |          |          |
|----|----------|----------|----------|
| As | 0.095768 | 0.019424 | 1.547202 |
| O  | 5.508051 | -0.31096 | -1.37204 |
| O  | -2.61265 | 4.768653 | -1.28763 |
| O  | -2.84987 | -4.91333 | -0.65994 |
| C  | -0.86998 | -1.50069 | 0.736307 |
| C  | -0.70677 | -2.76663 | 1.332368 |
| H  | -0.04622 | -2.88096 | 2.197655 |
| C  | 1.803675 | -0.10068 | 0.562828 |
| C  | -0.75286 | 1.521514 | 0.586047 |
| C  | -2.50241 | 3.232351 | 0.609597 |
| H  | -3.34948 | 3.687786 | 1.123395 |
| C  | 2.897779 | 0.607467 | 1.077269 |
| H  | 2.780297 | 1.20638  | 1.985979 |
| C  | -1.371   | -3.88667 | 0.844388 |
| H  | -1.24321 | -4.86976 | 1.302655 |
| C  | -1.84444 | 2.147838 | 1.201994 |
| H  | -2.2006  | 1.789808 | 2.173189 |
| C  | 2.004965 | -0.87473 | -0.5947  |
| H  | 1.177508 | -1.45054 | -1.01623 |
| C  | 4.153695 | 0.572858 | 0.459986 |
| H  | 4.976825 | 1.141942 | 0.893021 |
| C  | -0.31477 | 2.028249 | -0.6513  |
| H  | 0.541648 | 1.573548 | -1.15493 |
| C  | -1.73995 | -1.39756 | -0.35492 |
| H  | -1.89983 | -0.42971 | -0.83611 |
| C  | 4.335662 | -0.19982 | -0.69737 |
| C  | -2.42341 | -2.51482 | -0.85418 |
| H  | -3.09299 | -2.39012 | -1.70578 |
| C  | -2.05572 | 3.721552 | -0.62755 |
| C  | -0.95354 | 3.110126 | -1.25111 |
| H  | -0.61584 | 3.507767 | -2.21077 |
| C  | 3.249289 | -0.92566 | -1.21714 |
| H  | 3.410676 | -1.52635 | -2.11502 |
| C  | -2.23926 | -3.7702  | -0.25633 |
| C  | 6.641053 | 0.38633  | -0.90756 |
| H  | 6.479563 | 1.479704 | -0.9031  |

|   |          |          |          |
|---|----------|----------|----------|
| H | 7.459849 | 0.151613 | -1.60115 |
| H | 6.933107 | 0.068094 | 0.109767 |
| C | -3.71732 | 5.434197 | -0.7199  |
| H | -3.99499 | 6.234181 | -1.41957 |
| H | -3.46916 | 5.88567  | 0.257891 |
| H | -4.58267 | 4.759361 | -0.588   |
| C | -3.7367  | -4.8729  | -1.75415 |
| H | -4.5981  | -4.20735 | -1.56285 |
| H | -4.10518 | -5.89778 | -1.89724 |
| H | -3.23377 | -4.54189 | -2.681   |

---

**4'** (S<sub>0</sub>):  $E = -2928.900213$  hartree

| Atom | X        | Y        | Z        |
|------|----------|----------|----------|
| C    | -0.77311 | 1.333291 | -0.46486 |
| C    | -1.84799 | 0.739262 | 0.237262 |
| C    | -1.84799 | -0.73926 | 0.237262 |
| C    | -0.77311 | -1.33329 | -0.46486 |
| As   | 0.369088 | -5E-07   | -1.34712 |
| C    | -0.65395 | 2.722565 | -0.53885 |
| C    | -1.59739 | 3.535576 | 0.099403 |
| C    | -2.66557 | 2.954985 | 0.794339 |
| C    | -2.7953  | 1.566056 | 0.862284 |
| C    | -2.79531 | -1.56605 | 0.862284 |
| C    | -2.66557 | -2.95498 | 0.794338 |
| C    | -1.59739 | -3.53557 | 0.099402 |
| C    | -0.65396 | -2.72256 | -0.53885 |
| C    | 1.931061 | -1.4E-06 | -0.12739 |
| C    | 1.819589 | -3.6E-06 | 1.272092 |
| C    | 2.965706 | -4E-06   | 2.070431 |
| C    | 4.235702 | -2.1E-06 | 1.480527 |
| C    | 4.355077 | 1E-07    | 0.089151 |
| C    | 3.206031 | 4E-07    | -0.71134 |
| H    | 0.173215 | 3.179279 | -1.08965 |
| H    | -1.50282 | 4.623478 | 0.051017 |
| H    | -3.40524 | 3.591911 | 1.286271 |

|   |          |          |          |
|---|----------|----------|----------|
| H | -3.63626 | 1.128922 | 1.406171 |
| H | -3.63626 | -1.12892 | 1.40617  |
| H | -3.40524 | -3.59191 | 1.28627  |
| H | -1.50283 | -4.62348 | 0.051016 |
| H | 0.173209 | -3.17928 | -1.08965 |
| H | 0.833158 | -5.1E-06 | 1.742815 |
| H | 2.868497 | -5.7E-06 | 3.159513 |
| H | 5.130915 | -2.4E-06 | 2.10796  |
| H | 5.343692 | 1.5E-06  | -0.37779 |
| H | 3.306932 | 1.9E-06  | -1.80081 |

---

**5'** (S<sub>0</sub>):  $E = -3602.473938$  hartree

| Atom | X        | Y        | Z        |
|------|----------|----------|----------|
| As   | -1.07323 | -1.74834 | 0.36371  |
| F    | 1.879887 | 3.607814 | 0.698745 |
| F    | 0.541898 | 3.352751 | -0.98265 |
| F    | 2.689639 | 3.337752 | -1.28719 |
| F    | 4.586595 | -1.95125 | -0.96219 |
| F    | 5.346642 | -0.47713 | 0.42839  |
| F    | 4.313147 | -2.23771 | 1.162458 |
| C    | -2.15196 | -0.5153  | 1.446481 |
| C    | -3.14426 | 0.140755 | 0.680926 |
| C    | -2.11045 | -1.07571 | -1.16273 |
| C    | -3.12112 | -0.16961 | -0.76468 |
| C    | 0.5428   | 0.731154 | -0.10599 |
| H    | -0.41019 | 1.254384 | -0.20385 |
| C    | -2.06357 | -0.31194 | 2.824933 |
| H    | -1.30242 | -0.82952 | 3.41551  |
| C    | 0.5706   | -0.64822 | 0.150054 |
| C    | 1.734059 | 1.446633 | -0.24164 |
| C    | 3.001441 | -0.57461 | 0.118609 |
| C    | -1.97844 | -1.45551 | -2.49966 |
| H    | -1.20305 | -2.16494 | -2.80212 |
| C    | 1.805253 | -1.29376 | 0.264531 |
| H    | 1.847635 | -2.36592 | 0.472952 |

|   |          |          |          |
|---|----------|----------|----------|
| C | -2.84499 | -0.92101 | -3.45991 |
| H | -2.74104 | -1.20833 | -4.50924 |
| C | -2.95565 | 0.563775 | 3.454219 |
| H | -2.88568 | 0.733267 | 4.531623 |
| C | -3.94094 | 1.217153 | 2.704018 |
| H | -4.64016 | 1.895965 | 3.198764 |
| C | 2.970004 | 0.795718 | -0.13314 |
| H | 3.89923  | 1.355336 | -0.24551 |
| C | -4.0404  | 1.007177 | 1.326732 |
| H | -4.81744 | 1.522598 | 0.757269 |
| C | -3.84829 | -0.02357 | -3.07463 |
| H | -4.52749 | 0.387854 | -3.82556 |
| C | -3.99116 | 0.349691 | -1.73628 |
| H | -4.78168 | 1.048532 | -1.45265 |
| C | 1.707311 | 2.941736 | -0.45842 |
| C | 4.319511 | -1.30861 | 0.190303 |

---

**6'** (S<sub>0</sub>):  $E = -3424.661857$  hartree

| Atom | X        | Y        | Z        |
|------|----------|----------|----------|
| As   | 0.60518  | 0.204019 | -1.41883 |
| F    | -1.81905 | 1.963824 | -1.2872  |
| F    | -4.92872 | -0.58245 | 1.153428 |
| F    | -4.28007 | 1.692598 | -0.20984 |
| F    | -3.08755 | -2.56967 | 1.432735 |
| F    | -0.64504 | -2.32172 | 0.379682 |
| C    | 1.356811 | 1.514159 | -0.15516 |
| C    | 2.749093 | 3.128595 | 1.643115 |
| H    | 3.292253 | 3.762426 | 2.348636 |
| C    | 2.704966 | -0.46138 | 0.330832 |
| C    | 3.737005 | -1.21657 | 0.910458 |
| H    | 4.412239 | -0.76037 | 1.638043 |
| C    | 2.040475 | -2.41117 | -0.98111 |
| H    | 1.387259 | -2.88118 | -1.72075 |
| C    | -1.12492 | -0.14851 | -0.47281 |
| C    | 0.998078 | 2.855943 | -0.01272 |

|   |          |          |          |
|---|----------|----------|----------|
| H | 0.176488 | 3.274959 | -0.59708 |
| C | -2.10382 | 0.840636 | -0.609   |
| C | 2.423534 | 0.965468 | 0.593204 |
| C | 1.849451 | -1.07916 | -0.60948 |
| C | 1.693234 | 3.662849 | 0.895684 |
| H | 1.412059 | 4.711974 | 1.016995 |
| C | 3.117093 | 1.789632 | 1.492958 |
| H | 3.945407 | 1.388574 | 2.081684 |
| C | 3.909403 | -2.55551 | 0.554801 |
| H | 4.713623 | -3.13707 | 1.012555 |
| C | 3.06628  | -3.15456 | -0.38936 |
| H | 3.211277 | -4.20156 | -0.6669  |
| C | -3.71676 | -0.44347 | 0.630071 |
| C | -1.49362 | -1.30557 | 0.218527 |
| C | -3.38288 | 0.721594 | -0.06577 |
| C | -2.76971 | -1.45859 | 0.773936 |

---

**7'** (S<sub>0</sub>):  $E = -3043.338798$  hartree

| Atom | X        | Y        | Z        |
|------|----------|----------|----------|
| As   | -0.43985 | -1.1E-06 | 1.480693 |
| O    | 5.003934 | -1.2E-05 | -1.38017 |
| C    | -1.43655 | 1.333031 | 0.435352 |
| C    | -2.39509 | -0.73931 | -0.41894 |
| C    | -1.43656 | -1.33303 | 0.435351 |
| C    | 1.288652 | -4.3E-06 | 0.528268 |
| C    | 2.457555 | -4.5E-06 | 1.296482 |
| H    | 2.391792 | -3.4E-06 | 2.388745 |
| C    | -2.39509 | 0.739314 | -0.41894 |
| C    | 3.83272  | -8.2E-06 | -0.69738 |
| C    | -3.23818 | -1.56595 | -1.17897 |
| H    | -3.9888  | -1.12868 | -1.84192 |
| C    | -1.32865 | -2.72238 | 0.52419  |
| H    | -0.59197 | -3.179   | 1.191332 |
| C    | 3.726393 | -6.6E-06 | 0.700442 |
| H    | 4.613755 | -7.8E-06 | 1.333932 |



|   |          |          |          |
|---|----------|----------|----------|
| C | -1.32864 | 2.722384 | 0.524191 |
| H | -0.59195 | 3.178995 | 1.191334 |
| C | -3.23817 | 1.565963 | -1.17897 |
| H | -3.9888  | 1.128693 | -1.84192 |
| C | 2.661315 | -8.1E-06 | -1.48015 |
| H | 2.766602 | -9.3E-06 | -2.56724 |
| C | 1.411318 | -6.3E-06 | -0.87436 |
| H | 0.516469 | -6E-06   | -1.50201 |
| C | 6.22013  | 1.38E-05 | -0.66743 |
| H | 6.324972 | -0.89794 | -0.03187 |
| H | 6.324936 | 0.897977 | -0.03187 |
| H | 7.022684 | 2.71E-05 | -1.41725 |
| C | -3.119   | -2.95487 | -1.09397 |
| H | -3.77645 | -3.59173 | -1.69146 |
| C | -2.16554 | -3.53544 | -0.24841 |
| H | -2.07792 | -4.62337 | -0.18807 |
| C | -3.11899 | 2.954879 | -1.09397 |
| H | -3.77644 | 3.591744 | -1.69146 |
| C | -2.16552 | 3.535446 | -0.24841 |
| H | -2.0779  | 4.623374 | -0.18807 |

---

**8'** (S<sub>0</sub>):  $E = -3570.296517$  hartree

| Atom | X        | Y        | Z        |
|------|----------|----------|----------|
| As   | 0.540122 | -9E-07   | -1.3825  |
| S    | -2.79494 | -1.8907  | 0.782543 |
| S    | -2.79491 | 1.890712 | 0.782582 |
| C    | -0.62399 | -1.33263 | -0.52242 |
| C    | -1.69356 | -0.72339 | 0.121373 |
| C    | -1.69355 | 0.723401 | 0.121379 |
| C    | -0.62398 | 1.332634 | -0.52241 |
| C    | -0.70081 | -2.75416 | -0.4849  |
| C    | -1.81228 | -3.19921 | 0.191476 |
| C    | -1.81228 | 3.199219 | 0.191449 |
| C    | -0.70079 | 2.754162 | -0.48489 |
| C    | 2.0768   | -5.4E-06 | -0.13335 |

|   |          |          |          |
|---|----------|----------|----------|
| C | 1.934393 | -2.3E-05 | 1.262872 |
| C | 3.06354  | -2.3E-05 | 2.084655 |
| C | 4.345628 | -7.2E-06 | 1.52118  |
| C | 4.494546 | 9.7E-06  | 0.132844 |
| C | 3.362653 | 1.03E-05 | -0.69188 |
| H | 0.031814 | -3.42868 | -0.9311  |
| H | -2.11783 | -4.22744 | 0.380904 |
| H | -2.11784 | 4.227452 | 0.380848 |
| H | 0.031825 | 3.428682 | -0.9311  |
| H | 0.937118 | -3.5E-05 | 1.710004 |
| H | 2.943791 | -3.7E-05 | 3.171436 |
| H | 5.227447 | -8E-06   | 2.167241 |
| H | 5.492735 | 2.22E-05 | -0.31312 |
| H | 3.486556 | 2.27E-05 | -1.77894 |

---

**9'** (S<sub>0</sub>):  $E = -1035.715323$  hartree

| Atom | X        | Y        | Z        |
|------|----------|----------|----------|
| P    | -2.2E-05 | -1.2E-05 | -1.21002 |
| C    | 0.59239  | -1.56206 | -0.40261 |
| C    | 0.19986  | -2.77397 | -1.00097 |
| C    | 1.427496 | -1.61055 | 0.726159 |
| C    | 0.61052  | -4.00007 | -0.47301 |
| H    | -0.43273 | -2.75457 | -1.89352 |
| C    | 1.84916  | -2.8385  | 1.247497 |
| H    | 1.753598 | -0.68353 | 1.202614 |
| C    | 1.439728 | -4.03535 | 0.653102 |
| H    | 0.291307 | -4.93107 | -0.94904 |
| H    | 2.500773 | -2.85802 | 2.125309 |
| H    | 1.770503 | -4.99359 | 1.062113 |
| C    | 1.05658  | 1.294016 | -0.40266 |
| C    | 0.681137 | 2.041228 | 0.72631  |
| C    | 2.302201 | 1.560375 | -1.00126 |
| C    | 1.533654 | 3.020502 | 1.247578 |
| H    | -0.28454 | 1.859777 | 1.203034 |
| C    | 3.15861  | 2.529195 | -0.47339 |

|   |          |          |          |
|---|----------|----------|----------|
| H | 2.601625 | 1.003008 | -1.89395 |
| C | 2.774654 | 3.264729 | 0.652907 |
| H | 1.22483  | 3.594375 | 2.125549 |
| H | 4.124327 | 2.718516 | -0.94963 |
| H | 3.439054 | 4.030414 | 1.061845 |
| C | -1.64895 | 0.267961 | -0.40254 |
| C | -2.50328 | 1.211993 | -1.00231 |
| C | -2.10734 | -0.42919 | 0.727827 |
| C | -3.77041 | 1.469391 | -0.47423 |
| H | -2.17103 | 1.748659 | -1.89606 |
| C | -3.38155 | -0.18042 | 1.249321 |
| H | -1.46668 | -1.17364 | 1.205387 |
| C | -4.21441 | 0.770744 | 0.653465 |
| H | -4.41792 | 2.209863 | -0.95139 |
| H | -3.72339 | -0.73354 | 2.128373 |
| H | -5.20963 | 0.963364 | 1.06257  |

---

**10'** (S<sub>0</sub>):  $E = -934.760930$  hartree

| Atom | X        | Y        | Z        |
|------|----------|----------|----------|
| Sb   | 0.000507 | -0.00021 | -1.25881 |
| C    | -1.23422 | -1.4327  | -0.15765 |
| C    | -0.62347 | 1.784944 | -0.15747 |
| C    | 1.858171 | -0.35257 | -0.15702 |
| C    | -0.25122 | 3.038386 | -0.67201 |
| H    | 0.341398 | 3.104794 | -1.59036 |
| C    | -0.80844 | -2.07954 | 1.013363 |
| H    | 0.179792 | -1.8677  | 1.429552 |
| C    | 4.30251  | -0.87175 | 1.144266 |
| H    | 5.250972 | -1.07204 | 1.649659 |
| C    | 2.203155 | 0.337696 | 1.015769 |
| H    | 1.523846 | 1.085562 | 1.432837 |
| C    | -1.39673 | 1.738829 | 1.013378 |
| H    | -1.70686 | 0.776736 | 1.429192 |
| C    | -2.50599 | -1.73608 | -0.6724  |
| H    | -2.85928 | -1.25571 | -1.59077 |

|   |          |          |          |
|---|----------|----------|----------|
| C | -0.62971 | 4.219283 | -0.02454 |
| H | -0.32872 | 5.186484 | -0.43648 |
| C | 3.417737 | 0.078952 | 1.66197  |
| H | 3.673056 | 0.624719 | 2.574621 |
| C | -1.39634 | 4.161579 | 1.143291 |
| H | -1.69722 | 5.083173 | 1.648519 |
| C | 2.759014 | -1.29941 | -0.67314 |
| H | 2.521471 | -1.84398 | -1.59291 |
| C | -1.78003 | 2.920163 | 1.659349 |
| H | -2.38258 | 2.868591 | 2.570537 |
| C | 3.970793 | -1.56219 | -0.0254  |
| H | 4.659078 | -2.30468 | -0.43862 |
| C | -3.34029 | -2.65365 | -0.02508 |
| H | -4.32851 | -2.87578 | -0.4372  |
| C | -1.64069 | -3.00153 | 1.659154 |
| H | -1.29533 | -3.49776 | 2.570461 |
| C | -2.90774 | -3.28903 | 1.14285  |
| H | -3.5561  | -4.00985 | 1.647982 |

---

**11'** (S<sub>0</sub>):  $E = -1034.530037$  hartree

---

| Atom | X        | Y        | Z        |
|------|----------|----------|----------|
| C    | 2.601313 | 2.972436 | 0.582944 |
| C    | 1.483935 | 3.518605 | -0.06364 |
| C    | 0.533324 | 2.679746 | -0.65364 |
| C    | 0.692178 | 1.293164 | -0.57588 |
| C    | 1.815664 | 0.736982 | 0.082867 |
| C    | 2.772912 | 1.588553 | 0.654805 |
| H    | 3.34548  | 3.634286 | 1.033401 |
| H    | 1.358809 | 4.603311 | -0.1131  |
| H    | -0.32959 | 3.109206 | -1.17013 |
| H    | 3.649305 | 1.174955 | 1.160119 |
| C    | 0.692213 | -1.29315 | -0.57589 |
| C    | 0.533397 | -2.67973 | -0.65366 |
| C    | 1.484033 | -3.51857 | -0.06367 |
| C    | 2.601396 | -2.97238 | 0.582915 |
| C    | 2.772957 | -1.58849 | 0.654789 |
| C    | 1.815685 | -0.73694 | 0.08286  |
| H    | -0.32951 | -3.10921 | -1.17016 |
| H    | 1.358937 | -4.60328 | -0.11314 |
| H    | 3.345582 | -3.63421 | 1.033364 |
| H    | 3.649338 | -1.17487 | 1.160106 |
| P    | -0.35961 | -3.9E-06 | -1.35952 |
| C    | -1.89875 | -2.5E-05 | -0.31717 |
| C    | -3.13499 | 2.67E-05 | -0.98171 |
| C    | -1.88161 | -8.7E-05 | 1.088967 |
| C    | -4.33354 | 0.000019 | -0.25824 |
| H    | -3.15844 | 0.000072 | -2.07507 |
| C    | -3.07639 | -9.6E-05 | 1.810111 |
| H    | -0.92699 | -0.00013 | 1.621099 |
| C    | -4.30518 | -4.3E-05 | 1.137668 |
| H    | -5.28947 | 0.00006  | -0.78864 |
| H    | -3.05116 | -0.00015 | 2.903126 |
| H    | -5.23949 | -5E-05   | 1.705249 |

---

**12'** (S<sub>0</sub>):  $E = -933.572102$  hartree

---

| Atom | X        | Y        | Z        |
|------|----------|----------|----------|
| C    | 2.798292 | 2.924206 | 1.011088 |
| C    | 1.783816 | 3.560151 | 0.288123 |
| C    | 0.837707 | 2.791483 | -0.39945 |
| C    | 0.897496 | 1.396344 | -0.3546  |
| C    | 1.921267 | 0.743288 | 0.374258 |
| C    | 2.868884 | 1.530368 | 1.052822 |
| H    | 3.543041 | 3.518839 | 1.546485 |
| H    | 1.731146 | 4.651625 | 0.25721  |
| H    | 0.050191 | 3.293985 | -0.96873 |
| H    | 3.671936 | 1.056891 | 1.622003 |
| C    | 0.8975   | -1.39634 | -0.3546  |
| C    | 0.837716 | -2.79148 | -0.39945 |
| C    | 1.783827 | -3.56015 | 0.288117 |
| C    | 2.798302 | -2.9242  | 1.011083 |
| C    | 2.868889 | -1.53036 | 1.052819 |
| C    | 1.92127  | -0.74328 | 0.374257 |
| H    | 0.050201 | -3.29398 | -0.96874 |
| H    | 1.731161 | -4.65162 | 0.257202 |
| H    | 3.543053 | -3.51883 | 1.546479 |
| H    | 3.671939 | -1.05688 | 1.622001 |
| Sb   | -0.41208 | -1E-07   | -1.38018 |
| C    | -2.04139 | -3.2E-06 | 0.083756 |
| C    | -3.36044 | 4.8E-06  | -0.39501 |
| C    | -1.82086 | -1.3E-05 | 1.47021  |
| C    | -4.44247 | 3.8E-06  | 0.494311 |
| H    | -3.55737 | 0.000012 | -1.47198 |
| C    | -2.90031 | -1.4E-05 | 2.358332 |
| H    | -0.80148 | -1.9E-05 | 1.865258 |
| C    | -4.21292 | -5.6E-06 | 1.872119 |
| H    | -5.46532 | 1.02E-05 | 0.107546 |
| H    | -2.71629 | -2.1E-05 | 3.436316 |
| H    | -5.05547 | -6.6E-06 | 2.568754 |

---

## B. Optimized by B3LYP-D3BJ/def2svp

O=PPh<sub>3</sub> (S<sub>0</sub>):  $E = -1110.994177$  hartree

| Atom | X        | Y        | Z        |
|------|----------|----------|----------|
| P    | -1.1E-05 | 9.1E-06  | 0.923942 |
| O    | 0.00014  | 0.00019  | 2.429891 |
| C    | 1.5244   | -0.7138  | 0.218574 |
| C    | 2.21913  | -1.62534 | 1.027509 |
| C    | 2.016813 | -0.39602 | -1.05542 |
| C    | 3.384531 | -2.2312  | 0.554149 |
| H    | 1.839342 | -1.83611 | 2.029797 |
| C    | 3.18244  | -1.00602 | -1.52596 |
| H    | 1.501864 | 0.340764 | -1.6757  |
| C    | 3.864159 | -1.92595 | -0.72354 |
| H    | 3.924725 | -2.93991 | 1.186554 |
| H    | 3.564965 | -0.75528 | -2.51829 |
| H    | 4.777686 | -2.39917 | -1.09183 |
| C    | -0.14397 | 1.677006 | 0.218388 |
| C    | -0.66649 | 1.944568 | -1.05517 |
| C    | 0.299437 | 2.734403 | 1.026642 |
| C    | -0.72099 | 3.258983 | -1.52586 |
| H    | -1.04789 | 1.130293 | -1.67507 |
| C    | 0.241516 | 4.046528 | 0.553098 |
| H    | 0.672849 | 2.510987 | 2.028588 |
| C    | -0.26392 | 4.309272 | -0.7241  |
| H    | -1.13028 | 3.464896 | -2.51783 |
| H    | 0.586233 | 4.868666 | 1.184979 |
| H    | -0.31081 | 5.336979 | -1.09251 |
| C    | -1.38047 | -0.9633  | 0.218685 |
| C    | -2.51822 | -1.10681 | 1.026718 |
| C    | -1.35067 | -1.55087 | -1.05428 |
| C    | -3.6257  | -1.81305 | 0.55349  |
| H    | -2.51162 | -0.67076 | 2.028249 |
| C    | -2.46186 | -2.2553  | -1.52465 |
| H    | -0.45445 | -1.47512 | -1.67381 |

|   |          |          |          |
|---|----------|----------|----------|
| C | -3.6003  | -2.38338 | -0.72315 |
| H | -4.51029 | -1.92467 | 1.1852   |
| H | -2.43536 | -2.71376 | -2.51612 |
| H | -4.46696 | -2.93789 | -1.09129 |

---

**1 (S<sub>0</sub>):**  $E = -5149.266216$  hartree

| Atom | X        | Y        | Z        |
|------|----------|----------|----------|
| As   | 1.250681 | -0.06719 | -0.04147 |
| Cl   | -5.12257 | 2.082509 | -0.35948 |
| Cl   | -2.18851 | 3.313018 | -0.52747 |
| Cl   | -2.89834 | -2.91085 | 0.076942 |
| Cl   | -5.47528 | -1.04256 | -0.05178 |
| O    | -0.34262 | -1.31058 | -0.2136  |
| O    | -0.0595  | 1.190206 | -0.42118 |
| C    | 2.584404 | 1.386122 | -0.13599 |
| C    | -1.33663 | 0.755972 | -0.35964 |
| C    | 1.438272 | -0.5924  | 1.826782 |
| C    | -1.47684 | -0.64161 | -0.23814 |
| C    | -3.88886 | -0.34884 | -0.16982 |
| C    | -2.75854 | -1.1911  | -0.12329 |
| C    | 2.244537 | 2.745656 | -0.16455 |
| H    | 1.196742 | 3.041613 | -0.18284 |
| C    | -3.73496 | 1.041621 | -0.3024  |
| C    | -2.44027 | 1.599427 | -0.38883 |
| C    | 3.938179 | 1.014374 | -0.11346 |
| H    | 4.21844  | -0.0417  | -0.09033 |
| C    | 2.057711 | -1.25791 | -1.34585 |
| C    | 2.065623 | -2.64228 | -1.13123 |
| H    | 1.622444 | -3.06332 | -0.2287  |
| C    | 0.769502 | -1.722   | 2.327448 |
| H    | 0.113823 | -2.29427 | 1.672918 |
| C    | 2.237774 | 0.181758 | 2.681414 |
| H    | 2.747082 | 1.070218 | 2.309753 |
| C    | 2.599871 | -0.71822 | -2.51759 |
| H    | 2.593743 | 0.360934 | -2.68263 |



|   |          |          |          |
|---|----------|----------|----------|
| C | 3.251787 | 3.716809 | -0.17313 |
| H | 2.97884  | 4.774539 | -0.20002 |
| C | 0.926035 | -2.08166 | 3.667358 |
| H | 0.405904 | -2.96244 | 4.05083  |
| C | 1.729918 | -1.3156  | 4.515988 |
| H | 1.843712 | -1.59819 | 5.565285 |
| C | 4.59692  | 3.341899 | -0.14728 |
| H | 5.379421 | 4.104531 | -0.15305 |
| C | 4.939992 | 1.986458 | -0.11537 |
| H | 5.989949 | 1.684771 | -0.09511 |
| C | 2.379074 | -0.18127 | 4.022739 |
| H | 2.998488 | 0.429426 | 4.683568 |
| C | 3.155331 | -1.56803 | -3.47792 |
| H | 3.569618 | -1.1485  | -4.39752 |
| C | 2.643437 | -3.48213 | -2.0844  |
| H | 2.663106 | -4.56088 | -1.91341 |
| C | 3.183926 | -2.94747 | -3.2587  |
| H | 3.626101 | -3.60995 | -4.00651 |

---

**1** with O=PPh<sub>3</sub> (S<sub>0</sub>):  $E = -6260.314432$  hartree

| Atom | X        | Y        | Z        |
|------|----------|----------|----------|
| As   | -1.65455 | -1.17362 | -0.07134 |
| Cl   | 1.996866 | -2.10306 | -3.17092 |
| Cl   | 4.765266 | -2.44265 | -1.63793 |
| Cl   | 4.800154 | -2.41068 | 1.522917 |
| Cl   | 2.078456 | -2.01096 | 3.117588 |
| O    | -0.32767 | -1.88587 | -1.26895 |
| O    | -0.28769 | -1.73062 | 1.243043 |
| C    | -2.46482 | -0.28189 | -1.63286 |
| C    | -1.72335 | 0.034893 | -2.77681 |
| C    | -2.34859 | 0.655782 | -3.86134 |
| C    | -3.71093 | 0.967657 | -3.81019 |
| C    | -4.45346 | 0.642239 | -2.67231 |
| C    | -3.83228 | 0.014256 | -1.58847 |
| C    | -2.72203 | 1.291963 | 1.135343 |

|   |          |          |          |
|---|----------|----------|----------|
| C | -3.13152 | 2.114792 | 2.18871  |
| C | -3.16402 | 1.619489 | 3.493794 |
| C | -2.78552 | 0.296362 | 3.743289 |
| C | -2.36792 | -0.52534 | 2.694424 |
| C | -2.33965 | -0.02912 | 1.382041 |
| C | -2.73467 | -2.78408 | 0.069386 |
| C | -3.93949 | -2.77602 | 0.785552 |
| C | -4.72658 | -3.92953 | 0.847664 |
| C | -4.31329 | -5.09637 | 0.20059  |
| C | -3.11229 | -5.10531 | -0.51472 |
| C | -2.32538 | -3.95379 | -0.58541 |
| C | 0.870199 | -2.04649 | -0.72053 |
| C | 0.886279 | -1.97851 | 0.692577 |
| C | 2.097002 | -2.08291 | 1.380638 |
| C | 3.299922 | -2.25811 | 0.661896 |
| C | 3.281803 | -2.29459 | -0.7409  |
| C | 2.058526 | -2.17412 | -1.43533 |
| H | -0.6626  | -0.20577 | -2.80978 |
| H | -1.76468 | 0.897817 | -4.75312 |
| H | -4.19563 | 1.454899 | -4.65996 |
| H | -5.52046 | 0.873253 | -2.62592 |
| H | -3.41348 | 3.149026 | 1.981128 |
| H | -3.47877 | 2.264068 | 4.318117 |
| H | -2.80343 | -0.09663 | 4.762774 |
| H | -2.04025 | -1.54432 | 2.898576 |
| H | -4.26836 | -1.87448 | 1.304555 |
| H | -5.66435 | -3.91467 | 1.408382 |
| H | -4.9271  | -5.99887 | 0.253085 |
| H | -2.78516 | -6.0146  | -1.02479 |
| H | -1.39627 | -3.95435 | -1.15546 |
| P | 0.605818 | 2.037968 | -0.04685 |
| C | -0.5792  | 3.378978 | -0.37942 |
| C | -0.91506 | 4.358686 | 0.563815 |
| C | -1.2532  | 3.337919 | -1.61164 |
| C | -1.913   | 5.293803 | 0.272915 |
| H | -0.41444 | 4.37975  | 1.532852 |

|   |          |          |          |
|---|----------|----------|----------|
| C | -2.2566  | 4.263778 | -1.89266 |
| H | -1.01485 | 2.559692 | -2.33729 |
| C | -2.58682 | 5.244577 | -0.95022 |
| H | -2.173   | 6.055691 | 1.011585 |
| H | -2.78869 | 4.210151 | -2.84493 |
| H | -3.37484 | 5.969206 | -1.16899 |
| C | 1.179951 | 2.225116 | 1.660379 |
| C | 0.790693 | 1.258179 | 2.595703 |
| C | 1.997467 | 3.299061 | 2.050068 |
| C | 1.202238 | 1.379912 | 3.925156 |
| H | 0.18997  | 0.406135 | 2.279571 |
| C | 2.399567 | 3.416052 | 3.380265 |
| H | 2.327779 | 4.035521 | 1.313409 |
| C | 1.99736  | 2.45768  | 4.319071 |
| H | 0.906612 | 0.617027 | 4.647602 |
| H | 3.036683 | 4.249371 | 3.685632 |
| H | 2.319314 | 2.548069 | 5.359401 |
| C | 2.031943 | 2.324969 | -1.12942 |
| C | 2.825295 | 1.207952 | -1.43123 |
| C | 2.361183 | 3.58325  | -1.65269 |
| C | 3.945702 | 1.346478 | -2.25009 |
| H | 2.553165 | 0.232684 | -1.03128 |
| C | 3.48784  | 3.718913 | -2.46855 |
| H | 1.732957 | 4.45059  | -1.43638 |
| C | 4.277614 | 2.603468 | -2.76667 |
| H | 4.547841 | 0.465821 | -2.48238 |
| H | 3.74531  | 4.69765  | -2.88035 |
| H | 5.153914 | 2.714312 | -3.41001 |
| O | 0.010444 | 0.666666 | -0.30736 |
| H | -4.42545 | -0.23801 | -0.70702 |
| H | -2.68744 | 1.694401 | 0.125005 |

---

**4 (S<sub>0</sub>):**  $E = -5148.081367$  hartree

| Atom | X        | Y        | Z        |
|------|----------|----------|----------|
| As   | -1.16468 | -0.03039 | -0.04371 |

|    |          |          |          |
|----|----------|----------|----------|
| Cl | 2.723063 | -3.03722 | -0.33163 |
| Cl | 5.426715 | -1.34675 | -0.4294  |
| Cl | 5.281656 | 1.808396 | -0.50248 |
| Cl | 2.440497 | 3.246648 | -0.4741  |
| O  | 0.286547 | -1.26269 | -0.41177 |
| O  | 0.165868 | 1.257514 | -0.43282 |
| C  | -2.39162 | -1.30009 | -0.86416 |
| C  | -2.17121 | -2.65396 | -1.10655 |
| C  | -3.21647 | -3.42276 | -1.63153 |
| C  | -4.45416 | -2.82995 | -1.90391 |
| C  | -4.6632  | -1.46759 | -1.66765 |
| C  | -3.62546 | -0.68348 | -1.14972 |
| C  | -3.68994 | 0.777562 | -0.88619 |
| C  | -4.79211 | 1.605955 | -1.13215 |
| C  | -4.69729 | 2.978466 | -0.88247 |
| C  | -3.50975 | 3.537488 | -0.39686 |
| C  | -2.40359 | 2.718083 | -0.14194 |
| C  | -2.5106  | 1.348276 | -0.37312 |
| C  | -1.14065 | -0.26639 | 1.875465 |
| C  | -1.91177 | 0.571711 | 2.692101 |
| C  | -1.8961  | 0.393452 | 4.077443 |
| C  | -1.11309 | -0.61468 | 4.646318 |
| C  | -0.34467 | -1.44876 | 3.828985 |
| C  | -0.35522 | -1.28049 | 2.442875 |
| C  | 1.471226 | -0.65425 | -0.4349  |
| C  | 1.409179 | 0.754033 | -0.44936 |
| C  | 2.574105 | 1.516665 | -0.46681 |
| C  | 3.826648 | 0.864324 | -0.46978 |
| C  | 3.89142  | -0.53922 | -0.4414  |
| C  | 2.705164 | -1.30233 | -0.41187 |
| H  | -1.19452 | -3.09112 | -0.89772 |
| H  | -3.063   | -4.48539 | -1.83247 |
| H  | -5.26674 | -3.43489 | -2.31311 |
| H  | -5.63335 | -1.02141 | -1.8947  |
| H  | -5.7218  | 1.190563 | -1.52592 |
| H  | -5.55812 | 3.621526 | -1.08029 |

|   |          |          |          |
|---|----------|----------|----------|
| H | -3.44309 | 4.614059 | -0.22413 |
| H | -1.4633  | 3.137651 | 0.219791 |
| H | -2.52322 | 1.360991 | 2.252765 |
| H | -2.49719 | 1.047284 | 4.713512 |
| H | -1.10071 | -0.75013 | 5.730406 |
| H | 0.269646 | -2.23624 | 4.271533 |
| H | 0.242422 | -1.92909 | 1.802037 |

---

**4** with O=PPh<sub>3</sub> (S<sub>0</sub>):  $E = -6259.128909$  hartree

| Atom | X        | Y        | Z        |
|------|----------|----------|----------|
| As   | 0.961863 | 1.726508 | -0.05827 |
| Cl   | -2.8082  | 1.298962 | -3.13352 |
| Cl   | -5.47808 | 0.601959 | -1.55139 |
| Cl   | -5.44259 | 0.556566 | 1.610509 |
| Cl   | -2.72552 | 1.155073 | 3.15447  |
| O    | -0.51175 | 1.879408 | -1.27831 |
| O    | -0.45797 | 1.755004 | 1.252089 |
| C    | 2.109678 | 0.987034 | -1.45298 |
| C    | 1.896767 | 1.005476 | -2.82669 |
| C    | 2.863406 | 0.440396 | -3.66786 |
| C    | 4.020781 | -0.12799 | -3.12492 |
| C    | 4.218351 | -0.15786 | -1.74216 |
| C    | 3.252858 | 0.389956 | -0.88909 |
| C    | 3.290731 | 0.356536 | 0.594074 |
| C    | 4.298063 | -0.22898 | 1.372942 |
| C    | 4.177417 | -0.25395 | 2.765402 |
| C    | 3.059656 | 0.305714 | 3.394988 |
| C    | 2.055223 | 0.909478 | 2.629371 |
| C    | 2.181634 | 0.930744 | 1.243648 |
| C    | 1.409803 | 3.615438 | -0.01651 |
| C    | 2.473963 | 4.066051 | 0.776013 |
| C    | 2.813157 | 5.421587 | 0.785431 |
| C    | 2.091233 | 6.331364 | 0.008656 |
| C    | 1.029248 | 5.881997 | -0.78139 |
| C    | 0.687783 | 4.527706 | -0.79813 |

|   |          |          |          |
|---|----------|----------|----------|
| C | -1.68224 | 1.622611 | -0.7049  |
| C | -1.65491 | 1.567439 | 0.709291 |
| C | -2.80728 | 1.2291   | 1.417562 |
| C | -4.0059  | 0.957283 | 0.722162 |
| C | -4.02573 | 0.995315 | -0.68016 |
| C | -2.85568 | 1.328325 | -1.39585 |
| H | 0.977994 | 1.436174 | -3.22698 |
| H | 2.711406 | 0.441478 | -4.74999 |
| H | 4.771535 | -0.56857 | -3.78511 |
| H | 5.11362  | -0.62915 | -1.33394 |
| H | 5.170423 | -0.67957 | 0.896235 |
| H | 4.962329 | -0.71993 | 3.366171 |
| H | 2.968341 | 0.268197 | 4.482906 |
| H | 1.174481 | 1.348835 | 3.099223 |
| H | 3.03968  | 3.363238 | 1.389729 |
| H | 3.643438 | 5.767045 | 1.406181 |
| H | 2.355722 | 7.391565 | 0.01955  |
| H | 0.461676 | 6.589732 | -1.39053 |
| H | -0.13605 | 4.172602 | -1.41773 |
| P | 0.226792 | -2.06931 | -0.01719 |
| C | 1.784432 | -2.76503 | -0.64276 |
| C | 2.87236  | -3.00362 | 0.20922  |
| C | 1.922737 | -2.97626 | -2.02411 |
| C | 4.078875 | -3.47226 | -0.3147  |
| H | 2.780292 | -2.81631 | 1.2796   |
| C | 3.130785 | -3.44038 | -2.54301 |
| H | 1.083192 | -2.77295 | -2.69216 |
| C | 4.207487 | -3.6951  | -1.68804 |
| H | 4.922564 | -3.65978 | 0.353621 |
| H | 3.234499 | -3.59852 | -3.61858 |
| H | 5.152485 | -4.06254 | -2.09548 |
| C | 0.088154 | -2.52847 | 1.732692 |
| C | -0.33574 | -1.52523 | 2.614231 |
| C | 0.330449 | -3.82705 | 2.208033 |
| C | -0.51872 | -1.82136 | 3.96671  |
| H | -0.51884 | -0.52009 | 2.236944 |

|   |          |          |          |
|---|----------|----------|----------|
| C | 0.153572 | -4.11451 | 3.561672 |
| H | 0.664943 | -4.61253 | 1.526751 |
| C | -0.2722  | -3.11162 | 4.441149 |
| H | -0.86187 | -1.03655 | 4.643811 |
| H | 0.345734 | -5.1238  | 3.933157 |
| H | -0.41451 | -3.34178 | 5.499871 |
| C | -1.11059 | -2.90256 | -0.92076 |
| C | -2.12553 | -2.0855  | -1.43536 |
| C | -1.17905 | -4.29451 | -1.0825  |
| C | -3.21474 | -2.65476 | -2.09866 |
| H | -2.04972 | -1.0071  | -1.3135  |
| C | -2.26733 | -4.85995 | -1.74844 |
| H | -0.38258 | -4.93687 | -0.69942 |
| C | -3.28633 | -4.04157 | -2.25227 |
| H | -4.00206 | -2.00458 | -2.48586 |
| H | -2.32248 | -5.94355 | -1.87683 |
| H | -4.13779 | -4.4908  | -2.76926 |
| O | 0.086343 | -0.5705  | -0.19763 |

---

**5 (S<sub>0</sub>):  $E = -5821.666099$  hartree**

| Atom | X        | Y        | Z        |
|------|----------|----------|----------|
| As   | -0.72191 | -1.16124 | 0.329478 |
| Cl   | 3.389019 | 0.206916 | 2.641951 |
| Cl   | 2.53233  | -1.81547 | -3.25317 |
| Cl   | 5.427414 | -0.85924 | -2.33345 |
| Cl   | 5.860409 | 0.159029 | 0.624657 |
| F    | -4.56138 | 3.070431 | -1.36937 |
| O    | 0.519367 | -1.6501  | -1.00409 |
| O    | 0.880597 | -0.8791  | 1.36948  |
| F    | -3.61267 | 1.996894 | -2.99001 |
| F    | -3.11594 | 4.077638 | -2.62399 |
| F    | 1.472298 | 3.66003  | 1.513447 |
| F    | 0.301004 | 5.239306 | 0.595038 |
| F    | -0.35666 | 4.336601 | 2.448444 |
| C    | 4.107108 | -0.84457 | -1.21004 |

|   |          |          |          |
|---|----------|----------|----------|
| C | 4.301471 | -0.39549 | 0.108281 |
| C | 2.832236 | -1.28197 | -1.63056 |
| C | -1.63485 | -1.73735 | 1.946648 |
| C | 3.223708 | -0.38211 | 1.018258 |
| C | 1.974832 | -0.84282 | 0.605086 |
| C | -2.85102 | -2.37155 | 1.624845 |
| C | -2.11405 | -2.07532 | -0.688   |
| C | 1.778539 | -1.27636 | -0.72012 |
| C | -3.11457 | -2.56112 | 0.174383 |
| C | -2.05944 | 1.120984 | -0.8742  |
| H | -2.64103 | 0.379736 | -1.42242 |
| C | -1.2338  | -1.53319 | 3.264918 |
| H | -0.27357 | -1.06153 | 3.475299 |
| C | -1.06961 | 0.725713 | 0.031004 |
| C | -2.29641 | 2.48095  | -1.08996 |
| C | -0.56203 | 3.043182 | 0.489688 |
| C | -2.19641 | -2.23691 | -2.06951 |
| H | -1.38747 | -1.88151 | -2.7101  |
| C | -0.31835 | 1.686392 | 0.71728  |
| H | 0.459162 | 1.378046 | 1.416158 |
| C | -3.32078 | -2.87179 | -2.61061 |
| H | -3.40299 | -3.00851 | -3.6911  |
| C | -2.07918 | -1.9565  | 4.297067 |
| H | -1.78301 | -1.80936 | 5.337971 |
| C | -3.29914 | -2.57162 | 3.995765 |
| H | -3.95527 | -2.89911 | 4.805547 |
| C | -1.54681 | 3.446339 | -0.41421 |
| H | -1.71956 | 4.506426 | -0.60095 |
| C | -3.68816 | -2.78192 | 2.668923 |
| H | -4.64043 | -3.27084 | 2.455013 |
| C | -4.3348  | -3.33771 | -1.76628 |
| H | -5.21075 | -3.83165 | -2.19307 |
| C | -4.23647 | -3.19016 | -0.3791  |
| H | -5.03196 | -3.57255 | 0.263326 |
| C | -3.39954 | 2.909121 | -2.02775 |
| C | 0.223283 | 4.076815 | 1.262628 |

---



5 with O=PPh<sub>3</sub> (S<sub>0</sub>):  $E = -6932.716818$  hartree

| Atom | X        | Y        | Z        |
|------|----------|----------|----------|
| As   | 0.989747 | -0.26278 | -0.11118 |
| Cl   | -0.91411 | 3.430376 | -2.65542 |
| Cl   | -2.5914  | 5.351393 | -0.75415 |
| Cl   | -2.56338 | 4.855858 | 2.368205 |
| Cl   | -0.91252 | 2.405415 | 3.549724 |
| O    | 0.562371 | 1.314423 | -1.10963 |
| O    | 0.509622 | 0.85602  | 1.382611 |
| C    | 0.820854 | -1.3985  | -1.68711 |
| C    | 0.738411 | -1.0018  | -3.01695 |
| C    | 0.656477 | -1.98565 | -4.01034 |
| C    | 0.660954 | -3.33986 | -3.65904 |
| C    | 0.724885 | -3.72873 | -2.31856 |
| C    | 0.792104 | -2.7558  | -1.31414 |
| C    | 0.788719 | -3.01845 | 0.146871 |
| C    | 0.718274 | -4.28146 | 0.75006  |
| C    | 0.658033 | -4.38702 | 2.142516 |
| C    | 0.671714 | -3.24174 | 2.94709  |
| C    | 0.759386 | -1.97477 | 2.358364 |
| C    | 0.818324 | -1.87729 | 0.971269 |
| C    | 2.91075  | 0.084197 | -0.03888 |
| C    | 3.757007 | -0.783   | 0.658591 |
| C    | 5.134218 | -0.54366 | 0.689396 |
| C    | 5.677395 | 0.555783 | 0.022977 |
| C    | 4.828871 | 1.417645 | -0.67532 |
| C    | 3.450693 | 1.188812 | -0.70662 |
| C    | -0.12748 | 2.197395 | -0.39122 |
| C    | -0.14429 | 1.949494 | 1.00124  |
| C    | -0.90236 | 2.759018 | 1.846432 |
| C    | -1.63865 | 3.837756 | 1.310307 |
| C    | -1.63541 | 4.069247 | -0.0742  |
| C    | -0.87641 | 3.24184  | -0.92898 |
| H    | 0.719515 | 0.060108 | -3.2664  |

|   |          |          |          |
|---|----------|----------|----------|
| H | 0.58838  | -1.69411 | -5.06117 |
| H | 0.598103 | -4.10339 | -4.43786 |
| H | 0.700789 | -4.78861 | -2.06107 |
| H | 0.697816 | -5.18398 | 0.136719 |
| H | 0.59714  | -5.37472 | 2.605768 |
| H | 0.613016 | -3.33546 | 4.033742 |
| H | 0.772704 | -1.06955 | 2.9666   |
| H | 3.353726 | -1.65113 | 1.180299 |
| H | 2.793119 | 1.868452 | -1.24824 |
| P | -2.69032 | -1.12741 | -0.14694 |
| C | -2.6623  | -2.72963 | -0.99874 |
| C | -2.43337 | -3.9237  | -0.30008 |
| C | -2.78167 | -2.7521  | -2.39804 |
| C | -2.3503  | -5.1322  | -0.99459 |
| H | -2.31213 | -3.90939 | 0.783663 |
| C | -2.69417 | -3.96091 | -3.08677 |
| H | -2.93931 | -1.82089 | -2.94607 |
| C | -2.48551 | -5.15235 | -2.385   |
| H | -2.17484 | -6.06048 | -0.44604 |
| H | -2.78245 | -3.97301 | -4.17509 |
| H | -2.42089 | -6.09951 | -2.92597 |
| C | -3.1611  | -1.42575 | 1.578087 |
| C | -2.42341 | -0.75429 | 2.562105 |
| C | -4.24878 | -2.23536 | 1.942178 |
| C | -2.77305 | -0.89352 | 3.906962 |
| H | -1.5822  | -0.1269  | 2.271002 |
| C | -4.58771 | -2.3766  | 3.287979 |
| H | -4.82776 | -2.76076 | 1.17938  |
| C | -3.85012 | -1.70498 | 4.270569 |
| H | -2.2011  | -0.3564  | 4.666225 |
| H | -5.43131 | -3.00952 | 3.572956 |
| H | -4.12197 | -1.8138  | 5.323296 |
| C | -4.00127 | -0.14159 | -0.92309 |
| C | -3.70467 | 1.201255 | -1.19179 |
| C | -5.27419 | -0.65348 | -1.21642 |
| C | -4.67815 | 2.036356 | -1.74366 |

|   |          |          |          |
|---|----------|----------|----------|
| H | -2.70923 | 1.57975  | -0.96958 |
| C | -6.24415 | 0.183982 | -1.76938 |
| H | -5.50656 | -1.70401 | -1.02599 |
| C | -5.94781 | 1.527823 | -2.0298  |
| H | -4.4326  | 3.081597 | -1.94317 |
| H | -7.23555 | -0.2122  | -2.00122 |
| H | -6.71225 | 2.178528 | -2.46127 |
| O | -1.38738 | -0.3493  | -0.22348 |
| H | 6.751393 | 0.74003  | 0.047595 |
| C | 5.408843 | 2.57414  | -1.45181 |
| C | 6.028031 | -1.44973 | 1.498571 |
| F | 6.560778 | 3.008247 | -0.91186 |
| F | 5.677582 | 2.222327 | -2.72344 |
| F | 4.562416 | 3.614338 | -1.50074 |
| F | 6.113149 | -1.04092 | 2.77814  |
| F | 5.566315 | -2.71194 | 1.519523 |
| F | 7.27965  | -1.48133 | 1.010656 |

---

**6 (S<sub>0</sub>):**  $E = -5643.837224$  hartree

| Atom | X        | Y        | Z        |
|------|----------|----------|----------|
| As   | 1.035065 | -0.63362 | -0.0673  |
| Cl   | -5.49451 | -0.46002 | -1.63553 |
| Cl   | -2.72553 | -0.41178 | -3.21006 |
| Cl   | -2.72226 | -1.12171 | 3.043627 |
| Cl   | -5.49298 | -0.81617 | 1.501303 |
| F    | 1.035117 | 1.659733 | -2.21052 |
| O    | -0.36695 | -0.76269 | -1.34902 |
| F    | 0.910414 | 5.420368 | 0.576457 |
| F    | 0.964592 | 4.321468 | -1.91161 |
| F    | 0.937835 | 3.822574 | 2.778283 |
| F    | 1.008181 | 1.157311 | 2.51127  |
| O    | -0.36575 | -1.04739 | 1.1494   |
| C    | -3.99947 | -0.63792 | -0.77552 |
| C    | 2.31167  | -1.08057 | -1.47354 |
| C    | 4.411    | -1.76744 | -3.148   |

|   |          |          |          |
|---|----------|----------|----------|
| H | 5.238875 | -2.03339 | -3.80944 |
| C | -1.5837  | -0.76065 | -0.79199 |
| C | -2.7818  | -0.61595 | -1.48877 |
| C | 3.51124  | -1.71254 | 0.565973 |
| C | 4.572704 | -2.21057 | 1.331233 |
| H | 5.516646 | -2.48461 | 0.856571 |
| C | -3.99887 | -0.79665 | 0.62174  |
| C | 2.143716 | -1.53921 | 2.587647 |
| H | 1.192797 | -1.28845 | 3.055819 |
| C | 1.046162 | 1.304177 | 0.139445 |
| C | 2.138678 | -0.97528 | -2.85231 |
| H | 1.187326 | -0.6324  | -3.25689 |
| C | 1.019828 | 2.150336 | -0.97574 |
| C | 3.509743 | -1.55999 | -0.9113  |
| C | 2.314017 | -1.35897 | 1.216327 |
| C | 3.201661 | -1.32225 | -3.69296 |
| H | 3.084074 | -1.24817 | -4.77627 |
| C | 4.569318 | -1.89111 | -1.76457 |
| H | 5.513996 | -2.25671 | -1.35796 |
| C | -1.58341 | -0.91997 | 0.607424 |
| C | 4.417172 | -2.3728  | 2.710982 |
| H | 5.246502 | -2.76771 | 3.302479 |
| C | 3.20855  | -2.04998 | 3.337563 |
| H | 3.092864 | -2.19978 | 4.413242 |
| C | 0.950941 | 4.105136 | 0.436839 |
| C | 1.006545 | 1.896873 | 1.407205 |
| C | 0.981274 | 3.539227 | -0.83971 |
| C | -2.78039 | -0.93518 | 1.320421 |
| C | 0.967707 | 3.283371 | 1.566043 |

---

**6** with O=PPh<sub>3</sub> (S<sub>0</sub>):  $E = -6754.890221$  hartree

| Atom | X        | Y        | Z        |
|------|----------|----------|----------|
| As   | 1.430095 | -0.11024 | -0.07969 |
| Cl   | -0.75023 | 2.914744 | -3.21535 |
| Cl   | -2.63176 | 4.95622  | -1.66733 |

|    |          |          |          |
|----|----------|----------|----------|
| Cl | -2.64715 | 4.965841 | 1.493518 |
| Cl | -0.80598 | 2.907126 | 3.074459 |
| O  | 0.883483 | 1.225678 | -1.32627 |
| O  | 0.813975 | 1.177504 | 1.202332 |
| C  | 1.384771 | -1.50214 | -1.4437  |
| C  | 1.319015 | -1.33331 | -2.8213  |
| C  | 1.280549 | -2.47129 | -3.63763 |
| C  | 1.306299 | -3.74634 | -3.06361 |
| C  | 1.352278 | -3.90395 | -1.67558 |
| C  | 1.378612 | -2.777   | -0.84754 |
| C  | 1.374064 | -2.79252 | 0.636013 |
| C  | 1.342318 | -3.93786 | 1.440943 |
| C  | 1.300372 | -3.8119  | 2.832951 |
| C  | 1.295466 | -2.54939 | 3.43564  |
| C  | 1.338946 | -1.39602 | 2.643064 |
| C  | 1.378119 | -1.53114 | 1.259834 |
| C  | 3.317597 | 0.451635 | -0.03984 |
| C  | 4.347174 | -0.4955  | -0.05134 |
| C  | 5.694757 | -0.1332  | -0.02416 |
| C  | 6.040447 | 1.21812  | 0.016085 |
| C  | 5.037446 | 2.187737 | 0.028881 |
| C  | 3.694974 | 1.798925 | 0.000639 |
| C  | 0.093318 | 2.140369 | -0.77346 |
| C  | 0.060507 | 2.120901 | 0.640576 |
| C  | -0.78835 | 2.977946 | 1.336043 |
| C  | -1.6055  | 3.88364  | 0.624229 |
| C  | -1.584   | 3.890961 | -0.77855 |
| C  | -0.73246 | 3.010844 | -1.48095 |
| H  | 1.277633 | -0.32874 | -3.24452 |
| H  | 1.227665 | -2.36119 | -4.72341 |
| H  | 1.275128 | -4.63107 | -3.70373 |
| H  | 1.348769 | -4.90613 | -1.245   |
| H  | 1.341217 | -4.93004 | 0.986292 |
| H  | 1.269532 | -4.7101  | 3.454443 |
| H  | 1.251999 | -2.46216 | 4.523599 |
| H  | 1.324727 | -0.40249 | 3.092807 |

|   |          |          |          |
|---|----------|----------|----------|
| P | -2.16896 | -1.3086  | 0.0248   |
| C | -2.04661 | -3.00991 | -0.59797 |
| C | -1.75925 | -4.087   | 0.252531 |
| C | -2.16617 | -3.22629 | -1.98049 |
| C | -1.61681 | -5.37231 | -0.27446 |
| H | -1.63935 | -3.92162 | 1.323567 |
| C | -2.01937 | -4.51081 | -2.50202 |
| H | -2.37121 | -2.38606 | -2.64713 |
| C | -1.75137 | -5.5857  | -1.64873 |
| H | -1.39646 | -6.20925 | 0.392289 |
| H | -2.10876 | -4.67305 | -3.57821 |
| H | -1.64066 | -6.5927  | -2.05819 |
| C | -2.6002  | -1.38844 | 1.783858 |
| C | -1.91519 | -0.52085 | 2.644693 |
| C | -3.61642 | -2.21898 | 2.283261 |
| C | -2.24464 | -0.4862  | 4.001331 |
| H | -1.13066 | 0.122638 | 2.24981  |
| C | -3.93466 | -2.1855  | 3.640969 |
| H | -4.15632 | -2.89573 | 1.617377 |
| C | -3.24884 | -1.31851 | 4.500362 |
| H | -1.71424 | 0.201988 | 4.662535 |
| H | -4.72212 | -2.83446 | 4.031126 |
| H | -3.50461 | -1.29124 | 5.562365 |
| C | -3.56077 | -0.54291 | -0.85322 |
| C | -3.36878 | 0.758172 | -1.33504 |
| C | -4.79831 | -1.18148 | -1.0252  |
| C | -4.41142 | 1.427417 | -1.97944 |
| H | -2.39976 | 1.234457 | -1.20482 |
| C | -5.8377  | -0.5101  | -1.67042 |
| H | -4.9493  | -2.20301 | -0.66823 |
| C | -5.64575 | 0.793888 | -2.14424 |
| H | -4.24725 | 2.443125 | -2.34523 |
| H | -6.80178 | -1.00548 | -1.80753 |
| H | -6.46413 | 1.314786 | -2.64713 |
| O | -0.92553 | -0.46226 | -0.19316 |
| F | 4.076447 | -1.80084 | -0.08955 |

|   |          |          |          |
|---|----------|----------|----------|
| F | 6.645535 | -1.06286 | -0.03662 |
| F | 7.31648  | 1.578598 | 0.042533 |
| F | 5.363959 | 3.475467 | 0.067955 |
| F | 2.796043 | 2.77813  | 0.016031 |

---

7 (S<sub>0</sub>):  $E = -5262.528248$  hartree

---

| Atom | X        | Y        | Z        |
|------|----------|----------|----------|
| As   | 1.109264 | -0.4126  | 0.136649 |
| Cl   | -2.78783 | 0.786298 | 2.914021 |
| Cl   | -5.35543 | -1.35897 | -1.42943 |
| Cl   | -5.49429 | 0.076842 | 1.38176  |
| Cl   | -2.51677 | -2.06954 | -2.68574 |
| O    | -0.24107 | -1.26893 | -0.86848 |
| O    | -0.35876 | -0.15215 | 1.39331  |
| O    | 1.410562 | 5.376782 | -1.69553 |
| C    | 2.432392 | -1.32544 | -0.97796 |
| C    | 3.498067 | -1.32147 | 1.220334 |
| C    | 2.284694 | -0.74927 | 1.650553 |
| C    | 1.182008 | 1.428129 | -0.42342 |
| C    | 0.422255 | 2.399527 | 0.240478 |
| H    | -0.21594 | 2.111568 | 1.076046 |
| C    | -3.96137 | -0.34576 | 0.687131 |
| C    | 3.577903 | -1.64704 | -0.22725 |
| C    | -1.54192 | -0.38931 | 0.834645 |
| C    | -1.4833  | -1.01469 | -0.42804 |
| C    | -2.77432 | -0.03748 | 1.384334 |
| C    | -3.89943 | -0.98054 | -0.56485 |
| C    | 1.294118 | 4.114358 | -1.23413 |
| C    | 4.50201  | -1.55529 | 2.16772  |
| H    | 5.455708 | -1.99273 | 1.866134 |
| C    | 2.051237 | -0.43606 | 2.987588 |
| H    | 1.089939 | -0.01759 | 3.286396 |
| C    | 0.472763 | 3.735683 | -0.15948 |
| H    | -0.13236 | 4.469204 | 0.371958 |
| C    | 2.337922 | -1.63855 | -2.33215 |

|   |          |          |          |
|---|----------|----------|----------|
| H | 1.421523 | -1.41371 | -2.88087 |
| C | 4.660822 | -2.25993 | -0.87026 |
| H | 5.564232 | -2.51684 | -0.3136  |
| C | -2.64816 | -1.31119 | -1.13046 |
| C | 2.060734 | 3.138969 | -1.89799 |
| H | 2.692219 | 3.454174 | -2.73028 |
| C | 2.004059 | 1.810901 | -1.49806 |
| H | 2.60391  | 1.068481 | -2.02591 |
| C | 0.662448 | 6.407399 | -1.08507 |
| H | 0.927612 | 6.526977 | -0.0199  |
| H | -0.42337 | 6.224169 | -1.16501 |
| H | 0.910515 | 7.331951 | -1.62196 |
| C | 4.280036 | -1.23444 | 3.510549 |
| H | 5.066133 | -1.42453 | 4.245166 |
| C | 3.062376 | -0.68281 | 3.923459 |
| H | 2.897697 | -0.44811 | 4.977482 |
| C | 4.579528 | -2.55643 | -2.23421 |
| H | 5.424773 | -3.03854 | -2.73103 |
| C | 3.423734 | -2.25627 | -2.96413 |
| H | 3.365728 | -2.51104 | -4.02483 |

---

**7** with O=PPh<sub>3</sub> (S<sub>0</sub>):  $E = -6373.574574$  hartree

| Atom | X        | Y        | Z        |
|------|----------|----------|----------|
| As   | -1.67658 | -0.03786 | -0.11239 |
| Cl   | 0.754424 | -2.99649 | -3.14757 |
| Cl   | 2.729095 | -4.89476 | -1.53026 |
| Cl   | 2.690181 | -4.84354 | 1.631248 |
| Cl   | 0.714035 | -2.85839 | 3.140805 |
| O    | -0.9936  | -1.36352 | -1.32323 |
| O    | -0.96339 | -1.2541  | 1.209462 |
| C    | -1.6073  | 1.333508 | -1.49975 |
| C    | -1.46998 | 1.148743 | -2.87087 |
| C    | -1.47857 | 2.271143 | -3.70839 |
| C    | -1.62508 | 3.551891 | -3.16476 |
| C    | -1.74273 | 3.729914 | -1.78408 |



|   |          |          |          |
|---|----------|----------|----------|
| C | -1.72053 | 2.617501 | -0.93433 |
| C | -1.75287 | 2.661827 | 0.548558 |
| C | -1.79987 | 3.824263 | 1.330119 |
| C | -1.75246 | 3.730374 | 2.724021 |
| C | -1.66222 | 2.482976 | 3.352294 |
| C | -1.63072 | 1.313674 | 2.583217 |
| C | -1.67897 | 1.413872 | 1.195823 |
| C | -3.50765 | -0.65743 | -0.12434 |
| C | -4.45573 | -0.08901 | 0.731054 |
| C | -5.78884 | -0.51033 | 0.708588 |
| C | -6.18426 | -1.5187  | -0.18276 |
| C | -5.23243 | -2.09312 | -1.04404 |
| C | -3.91103 | -1.66731 | -1.01555 |
| C | -0.16552 | -2.21869 | -0.73529 |
| C | -0.15924 | -2.16782 | 0.679764 |
| C | 0.726203 | -2.96541 | 1.40357  |
| C | 1.604684 | -3.83734 | 0.723607 |
| C | 1.608927 | -3.87263 | -0.67876 |
| C | 0.720023 | -3.05607 | -1.41067 |
| H | -1.33579 | 0.14301  | -3.2713  |
| H | -1.36767 | 2.145608 | -4.78826 |
| H | -1.63011 | 4.424558 | -3.82205 |
| H | -1.82772 | 4.737421 | -1.37415 |
| H | -1.85752 | 4.80502  | 0.854589 |
| H | -1.78025 | 4.641339 | 3.326998 |
| H | -1.61035 | 2.421338 | 4.441736 |
| H | -1.55447 | 0.331985 | 3.052441 |
| H | -4.16427 | 0.694508 | 1.432399 |
| H | -6.50286 | -0.04863 | 1.389801 |
| H | -5.56097 | -2.8773  | -1.72853 |
| H | -3.17818 | -2.11857 | -1.68518 |
| P | 1.94391  | 1.351588 | 0.020955 |
| C | 1.726872 | 3.042892 | -0.60735 |
| C | 1.345773 | 4.093906 | 0.239028 |
| C | 1.85347  | 3.27141  | -1.98709 |
| C | 1.117986 | 5.366707 | -0.28835 |

|   |          |          |          |
|---|----------|----------|----------|
| H | 1.219508 | 3.916903 | 1.307709 |
| C | 1.621937 | 4.543221 | -2.50937 |
| H | 2.129654 | 2.449834 | -2.65129 |
| C | 1.260609 | 5.593272 | -1.65967 |
| H | 0.824281 | 6.183108 | 0.375653 |
| H | 1.717185 | 4.714326 | -3.58373 |
| H | 1.082719 | 6.590371 | -2.06982 |
| C | 2.360835 | 1.473821 | 1.782863 |
| C | 1.695073 | 0.59795  | 2.650331 |
| C | 3.339196 | 2.349324 | 2.2801   |
| C | 2.008152 | 0.598238 | 4.011482 |
| H | 0.938225 | -0.07836 | 2.25527  |
| C | 3.64129  | 2.35066  | 3.641992 |
| H | 3.861489 | 3.034398 | 1.608501 |
| C | 2.976015 | 1.47411  | 4.507971 |
| H | 1.494254 | -0.09716 | 4.678231 |
| H | 4.399854 | 3.034228 | 4.030517 |
| H | 3.219254 | 1.473953 | 5.573336 |
| C | 3.385127 | 0.661193 | -0.8425  |
| C | 3.268117 | -0.65722 | -1.30212 |
| C | 4.584262 | 1.365809 | -1.02634 |
| C | 4.347669 | -1.27701 | -1.93495 |
| H | 2.327048 | -1.18538 | -1.16269 |
| C | 5.660805 | 0.743914 | -1.66072 |
| H | 4.676196 | 2.40046  | -0.68729 |
| C | 5.543977 | -0.57689 | -2.11164 |
| H | 4.242014 | -2.30684 | -2.28261 |
| H | 6.595073 | 1.291133 | -1.80715 |
| H | 6.391029 | -1.05885 | -2.60592 |
| O | 0.751804 | 0.440636 | -0.19261 |
| O | -7.44598 | -1.99872 | -0.28298 |
| C | -8.44906 | -1.47025 | 0.554203 |
| H | -9.37742 | -2.00035 | 0.304066 |
| H | -8.21902 | -1.63347 | 1.622336 |
| H | -8.59632 | -0.38851 | 0.384603 |

---

**8 (S<sub>0</sub>): E = -5789.466432 hartree**

| Atom | X        | Y        | Z        |
|------|----------|----------|----------|
| As   | -1.05163 | -0.04048 | 0.059851 |
| Cl   | 5.35865  | 1.878581 | -0.4964  |
| Cl   | 2.511    | 3.283197 | -0.28128 |
| S    | -4.56615 | -1.64615 | -1.94831 |
| Cl   | 5.532351 | -1.27287 | -0.61227 |
| S    | -4.79862 | 1.987577 | -0.93798 |
| Cl   | 2.850478 | -2.99484 | -0.51582 |
| O    | 0.25267  | 1.275021 | -0.25789 |
| O    | 0.395322 | -1.24481 | -0.39422 |
| C    | -3.45357 | -0.58589 | -1.16102 |
| C    | -2.42293 | 1.347344 | -0.15065 |
| C    | -3.54632 | 0.809194 | -0.75694 |
| C    | 1.501095 | 0.781918 | -0.35079 |
| C    | -2.24926 | -1.22365 | -0.90521 |
| C    | 3.991161 | -0.48282 | -0.51789 |
| C    | 2.657183 | 1.557421 | -0.37312 |
| C    | 3.913939 | 0.919313 | -0.46201 |
| C    | 1.574149 | -0.62418 | -0.42183 |
| C    | -2.21104 | -2.57217 | -1.35091 |
| H    | -1.34173 | -3.22126 | -1.25201 |
| C    | -1.04466 | -0.43307 | 1.951427 |
| C    | -2.56264 | 2.726978 | 0.159505 |
| H    | -1.7802  | 3.335498 | 0.613087 |
| C    | -3.39964 | -2.94237 | -1.93539 |
| H    | -3.66593 | -3.90272 | -2.37412 |
| C    | 2.813853 | -1.25925 | -0.48746 |
| C    | -1.82769 | 0.334287 | 2.824292 |
| H    | -2.43846 | 1.15363  | 2.442495 |
| C    | -3.80065 | 3.209596 | -0.20157 |
| H    | -4.18835 | 4.221364 | -0.09266 |
| C    | -0.25981 | -1.48705 | 2.441398 |
| H    | 0.346005 | -2.07856 | 1.754499 |
| C    | -0.26245 | -1.76666 | 3.809435 |

|   |          |          |          |
|---|----------|----------|----------|
| H | 0.350383 | -2.58542 | 4.193329 |
| C | -1.04289 | -1.00411 | 4.683394 |
| H | -1.04063 | -1.22687 | 5.753019 |
| C | -1.82489 | 0.044216 | 4.190531 |
| H | -2.43485 | 0.642062 | 4.871599 |

---

**8** with O=PPh<sub>3</sub> (S<sub>0</sub>):  $E = -6900.519262$  hartree

| Atom | X        | Y        | Z        |
|------|----------|----------|----------|
| As   | 0.885909 | 1.67789  | -0.03477 |
| Cl   | -5.44417 | -0.10932 | 1.448661 |
| Cl   | -2.72157 | 0.21307  | 3.030579 |
| S    | 4.37952  | 0.548177 | -2.4102  |
| Cl   | -5.58821 | 0.689234 | -1.60101 |
| S    | 4.64538  | -0.11121 | 1.295007 |
| Cl   | -2.94154 | 1.648876 | -3.0864  |
| O    | -0.47858 | 1.222217 | 1.249797 |
| O    | -0.60126 | 1.841292 | -1.22456 |
| C    | 3.296957 | 0.868238 | -1.09271 |
| C    | 2.26882  | 0.881523 | 1.093844 |
| C    | 3.382556 | 0.577658 | 0.327688 |
| C    | -1.68055 | 1.103198 | 0.693822 |
| C    | 2.107548 | 1.416828 | -1.5388  |
| C    | -4.10108 | 0.857681 | -0.71749 |
| C    | -2.82181 | 0.628781 | 1.342234 |
| C    | -4.03923 | 0.510472 | 0.63829  |
| C    | -1.7455  | 1.440169 | -0.68151 |
| C    | 2.047638 | 1.566876 | -2.94837 |
| H    | 1.180015 | 1.953617 | -3.48235 |
| C    | 1.029111 | 3.575019 | 0.369336 |
| C    | 2.434242 | 0.579024 | 2.471331 |
| H    | 1.66689  | 0.737515 | 3.226956 |
| C    | 3.207674 | 1.143999 | -3.55718 |
| H    | 3.45532  | 1.152067 | -4.61754 |
| C    | -2.94225 | 1.308483 | -1.38245 |
| C    | 1.913451 | 4.02056  | 1.360588 |

|   |          |          |          |
|---|----------|----------|----------|
| H | 2.514026 | 3.304594 | 1.923694 |
| C | 3.670496 | 0.035439 | 2.732259 |
| H | 4.063161 | -0.31719 | 3.683704 |
| C | 0.261915 | 4.504052 | -0.34788 |
| H | -0.42508 | 4.154872 | -1.1193  |
| C | 0.381648 | 5.867961 | -0.07172 |
| H | -0.21945 | 6.587577 | -0.63294 |
| C | 1.265036 | 6.311887 | 0.916445 |
| H | 1.35598  | 7.37959  | 1.130636 |
| C | 2.030484 | 5.386621 | 1.630741 |
| H | 2.721778 | 5.727462 | 2.405366 |
| O | 0.478122 | -0.59143 | -0.66286 |
| P | 0.303608 | -2.0113  | -0.14351 |
| C | 0.930052 | -2.32362 | 1.532605 |
| C | 2.145744 | -2.99363 | 1.734606 |
| C | 0.212815 | -1.83725 | 2.637281 |
| C | 2.62542  | -3.19452 | 3.030617 |
| H | 2.7194   | -3.35716 | 0.880862 |
| C | 0.691187 | -2.05069 | 3.92949  |
| H | -0.71412 | -1.28426 | 2.494859 |
| C | 1.894763 | -2.73371 | 4.128696 |
| H | 3.574155 | -3.71464 | 3.181133 |
| H | 0.121706 | -1.67312 | 4.781917 |
| H | 2.267984 | -2.90085 | 5.142148 |
| C | -1.44864 | -2.47018 | -0.18094 |
| C | -2.0796  | -3.26902 | 0.783682 |
| C | -2.19305 | -1.93984 | -1.24809 |
| C | -3.45175 | -3.51492 | 0.690978 |
| H | -1.50892 | -3.67902 | 1.618549 |
| C | -3.5586  | -2.20089 | -1.34102 |
| H | -1.70362 | -1.29575 | -1.98088 |
| C | -4.19083 | -2.97826 | -0.36618 |
| H | -3.94738 | -4.11583 | 1.456652 |
| H | -4.13915 | -1.76305 | -2.1541  |
| H | -5.26787 | -3.14875 | -0.42271 |
| C | 1.210498 | -3.13581 | -1.24115 |

|   |          |          |          |
|---|----------|----------|----------|
| C | 2.144224 | -2.56804 | -2.11845 |
| C | 1.014928 | -4.52421 | -1.21725 |
| C | 2.89392  | -3.39326 | -2.96002 |
| H | 2.271379 | -1.48525 | -2.1326  |
| C | 1.763411 | -5.34298 | -2.06384 |
| H | 0.276451 | -4.96292 | -0.54135 |
| C | 2.704931 | -4.77776 | -2.93254 |
| H | 3.626072 | -2.94845 | -3.63781 |
| H | 1.611545 | -6.42478 | -2.04999 |
| H | 3.289824 | -5.42213 | -3.59345 |

---

**9 (S<sub>0</sub>):**  $E = -3254.913735$  hartree

| Atom | X        | Y        | Z        |
|------|----------|----------|----------|
| P    | 1.288818 | -0.07672 | 0.01451  |
| Cl   | -5.36076 | -0.99459 | 0.033082 |
| Cl   | -2.8235  | -2.92052 | -0.01963 |
| Cl   | -1.99096 | 3.319366 | 0.259213 |
| Cl   | -4.95251 | 2.133156 | 0.173652 |
| O    | 0.102864 | 1.111648 | 0.221095 |
| O    | -0.21662 | -1.30376 | 0.131597 |
| C    | -1.20526 | 0.735034 | 0.188053 |
| C    | 1.606954 | -0.71493 | -1.68157 |
| C    | -1.36015 | -0.65818 | 0.132426 |
| C    | 1.930654 | -1.0467  | 1.426835 |
| C    | -2.27877 | 1.60919  | 0.196849 |
| C    | -3.76097 | -0.32701 | 0.093037 |
| C    | 2.612722 | 1.247031 | 0.071077 |
| C    | -3.58393 | 1.067188 | 0.15373  |
| C    | -2.64962 | -1.19736 | 0.075316 |
| C    | 2.139488 | -0.37791 | 2.640649 |
| H    | 1.954247 | 0.695962 | 2.712456 |
| C    | 2.269212 | 0.104465 | -2.6137  |
| H    | 2.60242  | 1.101304 | -2.32952 |
| C    | 4.733773 | 3.100252 | 0.087326 |
| H    | 5.5559   | 3.819993 | 0.094739 |

|   |          |          |          |
|---|----------|----------|----------|
| C | 3.949253 | 0.812354 | 0.116471 |
| H | 4.173499 | -0.25673 | 0.145885 |
| C | 2.18534  | -2.42142 | 1.332836 |
| H | 2.016717 | -2.94995 | 0.394595 |
| C | 1.171058 | -1.99127 | -2.08949 |
| H | 0.601301 | -2.6108  | -1.40089 |
| C | 2.591254 | -1.08396 | 3.75729  |
| H | 2.740544 | -0.56071 | 4.704502 |
| C | 5.001128 | 1.727298 | 0.120058 |
| H | 6.032754 | 1.368816 | 0.152739 |
| C | 2.862859 | -2.45108 | 3.658838 |
| H | 3.228783 | -3.00033 | 4.529443 |
| C | 2.35505  | 2.62541  | 0.037766 |
| H | 1.326977 | 2.982617 | 0.004813 |
| C | 2.666059 | -3.11537 | 2.444301 |
| H | 2.879339 | -4.18368 | 2.362939 |
| C | 3.411234 | 3.543941 | 0.048533 |
| H | 3.193096 | 4.61449  | 0.026248 |
| C | 1.432008 | -2.44432 | -3.38269 |
| H | 1.097955 | -3.44123 | -3.67911 |
| C | 2.501017 | -0.34497 | -3.91479 |
| H | 3.005316 | 0.310668 | -4.62818 |
| C | 2.095251 | -1.62436 | -4.29949 |
| H | 2.28665  | -1.97878 | -5.31519 |

---

**9** with O=PPh<sub>3</sub> (S<sub>0</sub>):  $E = -4365.955173$  hartree

| Atom | X        | Y        | Z        |
|------|----------|----------|----------|
| P    | -1.99965 | -0.89219 | -0.07458 |
| Cl   | 1.284404 | -2.37869 | -3.21368 |
| Cl   | 3.922025 | -3.36687 | -1.71851 |
| Cl   | 3.980649 | -3.42929 | 1.440022 |
| Cl   | 1.423255 | -2.47876 | 3.081485 |
| O    | -0.91117 | -1.65695 | -1.22819 |
| O    | -0.83088 | -1.59826 | 1.184478 |
| C    | -2.70864 | 0.058872 | -1.52553 |

|   |          |          |          |
|---|----------|----------|----------|
| C | -1.93203 | 0.450732 | -2.62468 |
| C | -2.50164 | 1.187792 | -3.66665 |
| C | -3.85364 | 1.539148 | -3.62886 |
| C | -4.63735 | 1.141908 | -2.54212 |
| C | -4.06736 | 0.407746 | -1.49972 |
| C | -2.47336 | 1.742288 | 0.902057 |
| C | -2.66342 | 2.712198 | 1.889049 |
| C | -2.77212 | 2.337253 | 3.229178 |
| C | -2.68146 | 0.985529 | 3.575909 |
| C | -2.46696 | 0.018928 | 2.592385 |
| C | -2.37059 | 0.386726 | 1.237063 |
| C | -3.25902 | -2.21027 | 0.122922 |
| C | -4.37065 | -2.05918 | 0.96585  |
| C | -5.32269 | -3.07657 | 1.070935 |
| C | -5.17567 | -4.25666 | 0.339203 |
| C | -4.07363 | -4.41102 | -0.50609 |
| C | -3.12365 | -3.3948  | -0.61933 |
| C | 0.241824 | -2.12205 | -0.73938 |
| C | 0.274216 | -2.10122 | 0.664226 |
| C | 1.421484 | -2.50129 | 1.345934 |
| C | 2.548357 | -2.92092 | 0.602335 |
| C | 2.515974 | -2.91346 | -0.80183 |
| C | 1.348156 | -2.50132 | -1.48415 |
| H | -0.87874 | 0.18137  | -2.65186 |
| H | -1.8821  | 1.485426 | -4.5168  |
| H | -4.29761 | 2.112653 | -4.44644 |
| H | -5.69803 | 1.401862 | -2.50403 |
| H | -2.7126  | 3.764448 | 1.601184 |
| H | -2.9201  | 3.094403 | 4.003088 |
| H | -2.76019 | 0.680646 | 4.62232  |
| H | -2.35149 | -1.02453 | 2.880622 |
| H | -4.50157 | -1.14592 | 1.545878 |
| H | -6.18278 | -2.94304 | 1.731471 |
| H | -5.9189  | -5.05295 | 0.424928 |
| H | -3.9524  | -5.32837 | -1.08713 |
| H | -2.27646 | -3.51396 | -1.29425 |



|   |          |          |          |
|---|----------|----------|----------|
| P | 1.023513 | 1.854134 | -0.06255 |
| C | 0.201632 | 3.465223 | -0.28367 |
| C | 0.261003 | 4.494067 | 0.66492  |
| C | -0.58805 | 3.624199 | -1.43466 |
| C | -0.45748 | 5.676003 | 0.459677 |
| H | 0.852594 | 4.367274 | 1.572967 |
| C | -1.31057 | 4.800235 | -1.63142 |
| H | -0.66162 | 2.812061 | -2.15942 |
| C | -1.24495 | 5.828938 | -0.68429 |
| H | -0.41032 | 6.47487  | 1.203475 |
| H | -1.93467 | 4.909027 | -2.52133 |
| H | -1.81338 | 6.749503 | -0.83733 |
| C | 1.667513 | 1.812076 | 1.631898 |
| C | 0.983936 | 1.028801 | 2.570625 |
| C | 2.807923 | 2.537523 | 2.013374 |
| C | 1.429673 | 0.989654 | 3.893596 |
| H | 0.122737 | 0.438914 | 2.25953  |
| C | 3.244945 | 2.496248 | 3.337668 |
| H | 3.359857 | 3.12314  | 1.274324 |
| C | 2.552332 | 1.725258 | 4.279004 |
| H | 0.900147 | 0.36867  | 4.618533 |
| H | 4.133704 | 3.057471 | 3.63565  |
| H | 2.900528 | 1.689393 | 5.314182 |
| C | 2.464252 | 1.85598  | -1.16799 |
| C | 2.974763 | 0.601909 | -1.53548 |
| C | 3.06836  | 3.026616 | -1.64723 |
| C | 4.08727  | 0.516299 | -2.37201 |
| H | 2.489591 | -0.30157 | -1.17002 |
| C | 4.185532 | 2.937184 | -2.48269 |
| H | 2.660585 | 4.004214 | -1.37941 |
| C | 4.693996 | 1.685251 | -2.84388 |
| H | 4.468451 | -0.46761 | -2.65267 |
| H | 4.65614  | 3.848421 | -2.85955 |
| H | 5.564612 | 1.620867 | -3.50114 |
| O | 0.101187 | 0.692624 | -0.36549 |
| H | -4.69437 | 0.11073  | -0.6573  |

|   |          |          |          |
|---|----------|----------|----------|
| H | -2.37769 | 2.054768 | -0.13393 |
|---|----------|----------|----------|

---

**10 (S<sub>0</sub>):  $E = -3153.949790$  hartree**

| Atom | X        | Y        | Z        |
|------|----------|----------|----------|
| Sb   | -1.23453 | -0.1008  | -8.1E-05 |
| Cl   | 5.666428 | -0.9695  | -8.7E-05 |
| Cl   | 3.086288 | -2.83897 | 0.000525 |
| Cl   | 2.377101 | 3.40764  | -0.00193 |
| Cl   | 5.307797 | 2.171414 | -0.00134 |
| O    | 0.248311 | 1.324893 | -0.00131 |
| O    | 0.54995  | -1.27701 | -0.00043 |
| C    | 1.506793 | 0.853305 | -0.00111 |
| C    | -1.76645 | -1.08049 | 1.829268 |
| C    | 1.660536 | -0.5539  | -0.00061 |
| C    | -1.76833 | -1.08279 | -1.82765 |
| C    | 2.625101 | 1.68708  | -0.00132 |
| C    | 4.078793 | -0.26754 | -0.00049 |
| C    | -2.64361 | 1.538076 | -0.00042 |
| C    | 3.920298 | 1.128015 | -0.00103 |
| C    | 2.946385 | -1.10574 | -0.00024 |
| C    | -2.75654 | -0.52873 | -2.65197 |
| H    | -3.25251 | 0.404041 | -2.37948 |
| C    | -2.75426 | -0.52573 | 2.653601 |
| H    | -3.25089 | 0.406418 | 2.380192 |
| C    | -4.54159 | 3.598332 | -0.00063 |
| H    | -5.28043 | 4.403311 | -0.00072 |
| C    | -4.01492 | 1.236734 | 0.000167 |
| H    | -4.35846 | 0.198097 | 0.00071  |
| C    | -1.11229 | -2.2659  | -2.19933 |
| H    | -0.3126  | -2.66355 | -1.57409 |
| C    | -1.10955 | -2.26276 | 2.202101 |
| H    | -0.3102  | -2.66094 | 1.576746 |
| C    | -3.10254 | -1.17184 | -3.84405 |
| H    | -3.86968 | -0.73776 | -4.48962 |
| C    | -4.96173 | 2.264815 | 6.24E-05 |

|   |          |          |          |
|---|----------|----------|----------|
| H | -6.0274  | 2.023166 | 0.000522 |
| C | -2.46482 | -2.36    | -4.20986 |
| H | -2.73701 | -2.86056 | -5.14217 |
| C | -2.22449 | 2.875617 | -0.0011  |
| H | -1.15976 | 3.109861 | -0.00153 |
| C | -1.47054 | -2.90262 | -3.38991 |
| H | -0.96187 | -3.82447 | -3.68175 |
| C | -3.1772  | 3.900029 | -0.00121 |
| H | -2.8475  | 4.941849 | -0.00175 |
| C | -1.46653 | -2.89796 | 3.393871 |
| H | -0.95719 | -3.81916 | 3.68661  |
| C | -3.09901 | -1.16733 | 3.84686  |
| H | -3.86586 | -0.73271 | 4.492421 |
| C | -2.46042 | -2.35466 | 4.213843 |
| H | -2.73163 | -2.85403 | 5.147078 |

---

**10** with O=PPh<sub>3</sub> (S<sub>0</sub>):  $E = -4265.009583$  hartree

| Atom | X        | Y        | Z        |
|------|----------|----------|----------|
| Sb   | -1.37099 | -1.25967 | -0.06854 |
| Cl   | 2.540502 | -1.7344  | -3.14085 |
| Cl   | 5.309525 | -1.58979 | -1.58985 |
| Cl   | 5.31498  | -1.5622  | 1.572838 |
| Cl   | 2.555956 | -1.62203 | 3.141981 |
| O    | 0.201792 | -1.90411 | -1.3096  |
| O    | 0.193772 | -1.71628 | 1.303977 |
| C    | -2.33419 | -0.44983 | -1.81584 |
| C    | -1.58379 | -0.14607 | -2.95903 |
| C    | -2.21723 | 0.399316 | -4.07923 |
| C    | -3.59462 | 0.647296 | -4.061   |
| C    | -4.34429 | 0.329634 | -2.9255  |
| C    | -3.71522 | -0.22605 | -1.80569 |
| C    | -3.06026 | 0.956684 | 1.334561 |
| C    | -3.61858 | 1.647354 | 2.415424 |
| C    | -3.45833 | 1.162026 | 3.7153   |
| C    | -2.73884 | -0.01723 | 3.935012 |

|   |          |          |          |
|---|----------|----------|----------|
| C | -2.17957 | -0.70971 | 2.858099 |
| C | -2.34282 | -0.22398 | 1.552547 |
| C | -2.28557 | -3.19459 | 0.064268 |
| C | -3.44977 | -3.37666 | 0.821955 |
| C | -4.06352 | -4.63264 | 0.87249  |
| C | -3.51422 | -5.70808 | 0.169602 |
| C | -2.35169 | -5.5272  | -0.58648 |
| C | -1.73711 | -4.27353 | -0.64232 |
| C | 1.382396 | -1.85871 | -0.70814 |
| C | 1.377455 | -1.77695 | 0.714832 |
| C | 2.593686 | -1.68657 | 1.402171 |
| C | 3.816509 | -1.66    | 0.698653 |
| C | 3.815207 | -1.6995  | -0.70318 |
| C | 2.593782 | -1.78912 | -1.40199 |
| H | -0.51083 | -0.34271 | -2.96698 |
| H | -1.63132 | 0.631584 | -4.97233 |
| H | -4.08556 | 1.07702  | -4.93787 |
| H | -5.42211 | 0.509995 | -2.91004 |
| H | -4.17101 | 2.572333 | 2.23542  |
| H | -3.8904  | 1.704602 | 4.559784 |
| H | -2.6044  | -0.39593 | 4.951332 |
| H | -1.59164 | -1.61192 | 3.035076 |
| H | -3.88091 | -2.54422 | 1.38372  |
| H | -4.97074 | -4.77088 | 1.466228 |
| H | -3.99216 | -6.68999 | 0.211718 |
| H | -1.92033 | -6.36747 | -1.13645 |
| H | -0.8323  | -4.12669 | -1.23545 |
| P | 0.258795 | 2.123627 | -0.02319 |
| C | -1.16791 | 3.198914 | -0.3356  |
| C | -1.71438 | 4.033725 | 0.648509 |
| C | -1.80373 | 3.077458 | -1.58309 |
| C | -2.88658 | 4.746294 | 0.383017 |
| H | -1.24035 | 4.109466 | 1.627822 |
| C | -2.98    | 3.78071  | -1.8379  |
| H | -1.39694 | 2.41116  | -2.34444 |
| C | -3.52213 | 4.616343 | -0.85483 |

|   |          |          |          |
|---|----------|----------|----------|
| H | -3.31157 | 5.394928 | 1.152442 |
| H | -3.47792 | 3.663448 | -2.80236 |
| H | -4.44562 | 5.165313 | -1.05399 |
| C | 0.845383 | 2.426925 | 1.657307 |
| C | 0.759067 | 1.390869 | 2.595811 |
| C | 1.395905 | 3.669184 | 2.016387 |
| C | 1.206311 | 1.609263 | 3.90156  |
| H | 0.369597 | 0.415216 | 2.304939 |
| C | 1.833017 | 3.879148 | 3.323176 |
| H | 1.491042 | 4.46585  | 1.27424  |
| C | 1.733811 | 2.848754 | 4.26698  |
| H | 1.152169 | 0.794997 | 4.625921 |
| H | 2.262034 | 4.843138 | 3.606043 |
| H | 2.083915 | 3.013397 | 5.288876 |
| C | 1.572664 | 2.600949 | -1.16956 |
| C | 2.558422 | 1.635906 | -1.42855 |
| C | 1.642282 | 3.862802 | -1.77666 |
| C | 3.610951 | 1.929529 | -2.29464 |
| H | 2.490488 | 0.654332 | -0.96196 |
| C | 2.702898 | 4.153967 | -2.63877 |
| H | 0.866559 | 4.60867  | -1.58883 |
| C | 3.682978 | 3.189902 | -2.89765 |
| H | 4.363714 | 1.164864 | -2.49628 |
| H | 2.759662 | 5.134571 | -3.11706 |
| H | 4.506021 | 3.421599 | -3.57798 |
| O | -0.07612 | 0.649223 | -0.23928 |
| H | -4.31418 | -0.48103 | -0.92755 |
| H | -3.17861 | 1.356757 | 0.326964 |

---

**11** ( $S_0$ ):  $E = -3253.732810$  hartree

| Atom | X        | Y        | Z        |
|------|----------|----------|----------|
| P    | -1.21067 | -0.00055 | -0.15954 |
| Cl   | 2.457748 | -3.08948 | -0.45906 |
| Cl   | 5.220165 | -1.48377 | -0.41078 |
| Cl   | 5.179521 | 1.672666 | -0.3763  |

|    |          |          |          |
|----|----------|----------|----------|
| Cl | 2.386322 | 3.211074 | -0.38551 |
| O  | 0.072992 | -1.17245 | -0.54771 |
| O  | 0.037005 | 1.230288 | -0.4775  |
| C  | -2.43548 | -1.29256 | -0.68611 |
| C  | -2.24456 | -2.67384 | -0.76413 |
| C  | -3.32831 | -3.49879 | -1.08581 |
| C  | -4.58984 | -2.94465 | -1.32705 |
| C  | -4.78071 | -1.56152 | -1.26044 |
| C  | -3.70009 | -0.7311  | -0.94709 |
| C  | -3.71803 | 0.745    | -0.87039 |
| C  | -4.81522 | 1.578831 | -1.10968 |
| C  | -4.65641 | 2.965623 | -1.0346  |
| C  | -3.41002 | 3.522269 | -0.728   |
| C  | -2.30968 | 2.693171 | -0.48149 |
| C  | -2.46994 | 1.30632  | -0.54012 |
| C  | -1.16463 | -0.11147 | 1.664192 |
| C  | -1.73954 | 0.886721 | 2.464775 |
| C  | -1.68445 | 0.787194 | 3.856526 |
| C  | -1.05544 | -0.30516 | 4.4591   |
| C  | -0.47889 | -1.3004  | 3.664984 |
| C  | -0.53174 | -1.20784 | 2.273596 |
| C  | 1.306698 | -0.65241 | -0.50553 |
| C  | 1.285765 | 0.747885 | -0.46991 |
| C  | 2.466118 | 1.480443 | -0.43143 |
| C  | 3.69413  | 0.779836 | -0.42151 |
| C  | 3.713401 | -0.62683 | -0.44128 |
| C  | 2.503439 | -1.35572 | -0.47521 |
| H  | -1.25705 | -3.09849 | -0.58786 |
| H  | -3.18521 | -4.57967 | -1.1532  |
| H  | -5.43145 | -3.59512 | -1.57678 |
| H  | -5.76687 | -1.13674 | -1.45854 |
| H  | -5.78921 | 1.154406 | -1.36123 |
| H  | -5.51142 | 3.618373 | -1.22619 |
| H  | -3.29204 | 4.607441 | -0.68609 |
| H  | -1.33286 | 3.117086 | -0.25035 |
| H  | -2.23238 | 1.742816 | 2.003898 |

|   |          |          |          |
|---|----------|----------|----------|
| H | -2.13509 | 1.569348 | 4.471795 |
| H | -1.01273 | -0.38037 | 5.548258 |
| H | 0.018134 | -2.15475 | 4.130203 |
| H | -0.07492 | -1.98322 | 1.658403 |

---

**11** with O=PPh<sub>3</sub> (S<sub>0</sub>):  $E = -4364.776757$  hartree

| Atom | X        | Y        | Z        |
|------|----------|----------|----------|
| P    | 0.831962 | 1.835279 | -0.11723 |
| Cl   | -2.72277 | 1.028764 | -3.26011 |
| Cl   | -5.39073 | 0.287495 | -1.69199 |
| Cl   | -5.42989 | 0.417292 | 1.466493 |
| Cl   | -2.76621 | 1.217741 | 3.034431 |
| O    | -0.48721 | 1.824101 | -1.32724 |
| O    | -0.48526 | 1.812287 | 1.092727 |
| C    | 1.99395  | 1.171397 | -1.40005 |
| C    | 1.791155 | 1.096265 | -2.7777  |
| C    | 2.811509 | 0.59432  | -3.59468 |
| C    | 4.022443 | 0.174394 | -3.03408 |
| C    | 4.21852  | 0.231018 | -1.65249 |
| C    | 3.198026 | 0.717298 | -0.82902 |
| C    | 3.2083   | 0.766872 | 0.645996 |
| C    | 4.242796 | 0.338713 | 1.485937 |
| C    | 4.071179 | 0.38263  | 2.871969 |
| C    | 2.874399 | 0.857102 | 3.420198 |
| C    | 1.842804 | 1.301092 | 2.585117 |
| C    | 2.01001  | 1.254464 | 1.201153 |
| C    | 1.159214 | 3.641166 | -0.11991 |
| C    | 0.615048 | 4.453719 | 0.888561 |
| C    | 0.871187 | 5.825558 | 0.90502  |
| C    | 1.673349 | 6.404887 | -0.08209 |
| C    | 2.216428 | 5.60305  | -1.08832 |
| C    | 1.961826 | 4.229557 | -1.10908 |
| C    | -1.68299 | 1.546519 | -0.82378 |
| C    | -1.68912 | 1.554099 | 0.581966 |
| C    | -2.82633 | 1.203377 | 1.296649 |

|   |          |          |          |
|---|----------|----------|----------|
| C | -3.99432 | 0.839381 | 0.588001 |
| C | -3.98176 | 0.804594 | -0.81582 |
| C | -2.81512 | 1.157966 | -1.53159 |
| H | 0.838903 | 1.413385 | -3.20115 |
| H | 2.658258 | 0.528627 | -4.67464 |
| H | 4.814297 | -0.2175  | -3.6768  |
| H | 5.154856 | -0.12492 | -1.22009 |
| H | 5.174302 | -0.0419  | 1.062409 |
| H | 4.874347 | 0.04088  | 3.529462 |
| H | 2.741078 | 0.877432 | 4.504358 |
| H | 0.906662 | 1.664028 | 3.007774 |
| H | -0.01436 | 4.007595 | 1.658403 |
| H | 0.440043 | 6.445569 | 1.694837 |
| H | 1.872834 | 7.479174 | -0.06763 |
| H | 2.841953 | 6.047048 | -1.86652 |
| H | 2.390442 | 3.616442 | -1.90185 |
| P | 0.410106 | -1.9895  | 0.054582 |
| C | 2.042351 | -2.55466 | -0.50743 |
| C | 3.123583 | -2.63945 | 0.381947 |
| C | 2.241451 | -2.816   | -1.87243 |
| C | 4.38595  | -3.00632 | -0.08813 |
| H | 2.981557 | -2.41116 | 1.438976 |
| C | 3.504689 | -3.18021 | -2.33735 |
| H | 1.406173 | -2.73004 | -2.57046 |
| C | 4.576046 | -3.28191 | -1.4448  |
| H | 5.224621 | -3.07261 | 0.608847 |
| H | 3.655219 | -3.3789  | -3.40063 |
| H | 5.564769 | -3.57019 | -1.81003 |
| C | 0.266832 | -2.41793 | 1.812768 |
| C | -0.24447 | -1.42694 | 2.660904 |
| C | 0.592488 | -3.6834  | 2.325094 |
| C | -0.43244 | -1.70215 | 4.017025 |
| H | -0.48829 | -0.44749 | 2.252538 |
| C | 0.409328 | -3.9504  | 3.682154 |
| H | 0.996533 | -4.45825 | 1.669676 |
| C | -0.1046  | -2.96002 | 4.52813  |



|   |          |          |          |
|---|----------|----------|----------|
| H | -0.84143 | -0.92757 | 4.669082 |
| H | 0.665991 | -4.93387 | 4.082801 |
| H | -0.25066 | -3.1743  | 5.589669 |
| C | -0.82389 | -2.96389 | -0.85709 |
| C | -1.91731 | -2.2579  | -1.37661 |
| C | -0.74373 | -4.35454 | -1.02278 |
| C | -2.93403 | -2.93693 | -2.05105 |
| H | -1.95767 | -1.17782 | -1.25032 |
| C | -1.76085 | -5.03022 | -1.69906 |
| H | 0.114486 | -4.90957 | -0.63647 |
| C | -2.85644 | -4.32308 | -2.20992 |
| H | -3.78145 | -2.37221 | -2.44577 |
| H | -1.6993  | -6.11304 | -1.83118 |
| H | -3.65033 | -4.85807 | -2.7368  |
| O | 0.134158 | -0.51643 | -0.16405 |

---

**12 (S<sub>0</sub>):  $E = -3152.755449$  hartree**

| Atom | X        | Y        | Z        |
|------|----------|----------|----------|
| Sb   | -1.12617 | -0.07114 | 0.096323 |
| Cl   | 3.017187 | -2.92485 | -0.43418 |
| Cl   | 5.657042 | -1.15147 | -0.59177 |
| Cl   | 5.413974 | 1.998178 | -0.5338  |
| Cl   | 2.542345 | 3.339159 | -0.3128  |
| O    | 0.539885 | -1.28662 | -0.31972 |
| O    | 0.333574 | 1.342265 | -0.22614 |
| C    | -2.34189 | -1.21153 | -1.21932 |
| C    | -2.0576  | -2.47074 | -1.74141 |
| C    | -3.00298 | -3.08712 | -2.56852 |
| C    | -4.2045  | -2.43092 | -2.85538 |
| C    | -4.47253 | -1.16083 | -2.33597 |
| C    | -3.53732 | -0.52138 | -1.50878 |
| C    | -3.71696 | 0.851297 | -0.94228 |
| C    | -4.84782 | 1.648547 | -1.17471 |
| C    | -4.92362 | 2.938627 | -0.64266 |
| C    | -3.87625 | 3.459091 | 0.123781 |

|   |          |          |          |
|---|----------|----------|----------|
| C | -2.74323 | 2.675331 | 0.370685 |
| C | -2.67754 | 1.38487  | -0.1505  |
| C | -1.16064 | -0.61499 | 2.149757 |
| C | -2.07918 | -0.00234 | 3.011921 |
| C | -2.09187 | -0.35693 | 4.363607 |
| C | -1.19127 | -1.31204 | 4.844897 |
| C | -0.27634 | -1.91807 | 3.978177 |
| C | -0.25539 | -1.57383 | 2.624207 |
| C | 1.676278 | -0.58991 | -0.37274 |
| C | 1.570708 | 0.822423 | -0.32604 |
| C | 2.720874 | 1.613431 | -0.37447 |
| C | 3.990883 | 1.007059 | -0.46459 |
| C | 4.099048 | -0.39294 | -0.49498 |
| C | 2.938271 | -1.1887  | -0.43819 |
| H | -1.10501 | -2.95208 | -1.51064 |
| H | -2.80116 | -4.0738  | -2.99138 |
| H | -4.94353 | -2.91112 | -3.50106 |
| H | -5.41407 | -0.67024 | -2.58823 |
| H | -5.6755  | 1.272262 | -1.77828 |
| H | -5.8097  | 3.547546 | -0.83669 |
| H | -3.93883 | 4.474226 | 0.522405 |
| H | -1.91174 | 3.075325 | 0.95569  |
| H | -2.78014 | 0.74719  | 2.636975 |
| H | -2.80533 | 0.116458 | 5.042199 |
| H | -1.20179 | -1.58485 | 5.902834 |
| H | 0.427112 | -2.66325 | 4.356886 |
| H | 0.452533 | -2.04276 | 1.938098 |

---

**12** with O=PPh<sub>3</sub> (S<sub>0</sub>):  $E = -4263.814259$  hartree

| Atom | X        | Y        | Z        |
|------|----------|----------|----------|
| Sb   | 1.002397 | 1.552361 | -0.03685 |
| Cl   | -2.94371 | 1.402184 | -3.10725 |
| Cl   | -5.60974 | 0.629622 | -1.56264 |
| Cl   | -5.57561 | 0.442929 | 1.594085 |
| Cl   | -2.87092 | 0.977505 | 3.162412 |

|   |          |          |          |
|---|----------|----------|----------|
| O | -0.64657 | 1.862651 | -1.28993 |
| O | -0.58727 | 1.614579 | 1.345367 |
| C | 2.305509 | 0.805392 | -1.55545 |
| C | 2.125746 | 0.859826 | -2.93379 |
| C | 3.078685 | 0.269862 | -3.77253 |
| C | 4.194869 | -0.3623  | -3.21602 |
| C | 4.363627 | -0.42206 | -1.83087 |
| C | 3.413395 | 0.153875 | -0.97382 |
| C | 3.483115 | 0.07339  | 0.517087 |
| C | 4.520766 | -0.56621 | 1.214793 |
| C | 4.483998 | -0.66509 | 2.60794  |
| C | 3.417709 | -0.12379 | 3.334065 |
| C | 2.385943 | 0.536397 | 2.657423 |
| C | 2.42649  | 0.631967 | 1.26899  |
| C | 1.478999 | 3.633227 | 0.120712 |
| C | 2.665266 | 4.0231   | 0.755359 |
| C | 2.993137 | 5.378981 | 0.849735 |
| C | 2.135947 | 6.344673 | 0.314471 |
| C | 0.951536 | 5.95467  | -0.31808 |
| C | 0.620857 | 4.600278 | -0.41749 |
| C | -1.79317 | 1.582123 | -0.67581 |
| C | -1.76399 | 1.459574 | 0.743693 |
| C | -2.93405 | 1.107495 | 1.425744 |
| C | -4.13414 | 0.870755 | 0.723683 |
| C | -4.15456 | 0.971    | -0.67463 |
| C | -2.9813  | 1.328702 | -1.36684 |
| H | 1.239665 | 1.346746 | -3.34804 |
| H | 2.949834 | 0.301477 | -4.85726 |
| H | 4.939717 | -0.82537 | -3.86765 |
| H | 5.233939 | -0.93833 | -1.42384 |
| H | 5.360343 | -1.0033  | 0.671943 |
| H | 5.297048 | -1.17307 | 3.132487 |
| H | 3.390651 | -0.21522 | 4.422392 |
| H | 1.546836 | 0.966311 | 3.208756 |
| H | 3.336274 | 3.273377 | 1.182794 |
| H | 3.918801 | 5.681366 | 1.346004 |

|   |          |          |          |
|---|----------|----------|----------|
| H | 2.391326 | 7.404492 | 0.391197 |
| H | 0.28076  | 6.708853 | -0.73735 |
| H | -0.29831 | 4.291522 | -0.91879 |
| P | 0.128455 | -2.08426 | -0.02796 |
| C | 1.602357 | -2.87731 | -0.72461 |
| C | 2.726292 | -3.14656 | 0.070545 |
| C | 1.65082  | -3.11758 | -2.10729 |
| C | 3.879015 | -3.67576 | -0.51196 |
| H | 2.707635 | -2.93281 | 1.139561 |
| C | 2.809139 | -3.63617 | -2.68482 |
| H | 0.781382 | -2.89526 | -2.72969 |
| C | 3.920667 | -3.92258 | -1.88635 |
| H | 4.751284 | -3.88561 | 0.111195 |
| H | 2.845586 | -3.81507 | -3.76141 |
| H | 4.826009 | -4.33306 | -2.33992 |
| C | 0.026318 | -2.53381 | 1.719944 |
| C | -0.39029 | -1.53591 | 2.612161 |
| C | 0.295865 | -3.83132 | 2.186815 |
| C | -0.54323 | -1.83983 | 3.966256 |
| H | -0.5884  | -0.52657 | 2.251796 |
| C | 0.145762 | -4.12467 | 3.542572 |
| H | 0.636289 | -4.60821 | 1.498674 |
| C | -0.27524 | -3.12917 | 4.431916 |
| H | -0.88012 | -1.05979 | 4.651652 |
| H | 0.359028 | -5.13202 | 3.907444 |
| H | -0.39442 | -3.36325 | 5.49257  |
| C | -1.33089 | -2.73046 | -0.88548 |
| C | -1.99206 | -1.85934 | -1.76361 |
| C | -1.83678 | -4.01891 | -0.65601 |
| C | -3.16687 | -2.26952 | -2.3977  |
| H | -1.59254 | -0.86064 | -1.93271 |
| C | -3.00367 | -4.42724 | -1.30234 |
| H | -1.33616 | -4.69673 | 0.038322 |
| C | -3.67199 | -3.55093 | -2.16605 |
| H | -3.69179 | -1.57003 | -3.05069 |
| H | -3.40337 | -5.42742 | -1.12    |

|   |          |          |          |
|---|----------|----------|----------|
| H | -4.59684 | -3.86854 | -2.65344 |
| O | 0.12915  | -0.5711  | -0.22213 |

---

Cartesian coordinates of optimized geometries formed during the hydrolysis reactions  
Hydrolysis of 1

**1**

$E$  at B3LYP/6-31G\*\* = -5148.65080876 Hartree

$E$  at B3LYP/SDD + 6-31G\*\*//B3LYP/6-31G\*\* = -2921.00653886 Hartree

| Atom | X        | Y        | Z        |
|------|----------|----------|----------|
| As   | -1.22695 | -0.01462 | 0.035326 |
| Cl   | 5.191323 | 2.017012 | 0.207499 |
| Cl   | 2.251433 | 3.294087 | 0.339415 |
| Cl   | 2.867825 | -2.96932 | -0.01308 |
| Cl   | 5.495001 | -1.13573 | 0.029486 |
| O    | 0.349171 | -1.30487 | 0.175131 |
| O    | 0.115584 | 1.212087 | 0.309517 |
| C    | -2.52207 | 1.452916 | 0.203764 |
| C    | 1.385229 | 0.743114 | 0.235983 |
| C    | -1.56437 | -0.58598 | -1.78322 |
| C    | 1.498221 | -0.65654 | 0.166002 |
| C    | 3.912042 | -0.40672 | 0.111219 |
| C    | 2.768789 | -1.23147 | 0.09504  |
| C    | -2.19842 | 2.807997 | 0.06301  |
| H    | -1.17077 | 3.10431  | -0.10653 |
| C    | 3.78175  | 0.989905 | 0.187901 |
| C    | 2.495897 | 1.568623 | 0.249861 |
| C    | -3.85874 | 1.094721 | 0.429764 |
| H    | -4.13594 | 0.051829 | 0.549348 |
| C    | -1.98257 | -1.20163 | 1.355417 |
| C    | -2.56125 | -2.40692 | 0.954645 |
| H    | -2.57653 | -2.6901  | -0.09291 |
| C    | -0.97293 | -1.75184 | -2.29342 |
| H    | -0.29017 | -2.32206 | -1.6767  |
| C    | -2.42348 | 0.166753 | -2.59552 |

|   |           |           |          |
|---|-----------|-----------|----------|
| H | -2.88177  | 1.074351  | -2.222   |
| C | -1.95781  | -0.83201  | 2.701687 |
| H | -1.51893  | 0.115321  | 3.002401 |
| C | -3.19379  | 3.783326  | 0.149758 |
| H | -2.92726  | 4.830874  | 0.045092 |
| C | -1.25549  | -2.16291  | -3.59529 |
| H | -0.79705  | -3.06836  | -3.98096 |
| C | -2.11262  | -1.41134  | -4.40076 |
| H | -2.32475  | -1.7313   | -5.41667 |
| C | -4.52129  | 3.416728  | 0.373103 |
| H | -5.29309  | 4.177855  | 0.440681 |
| C | -4.85364  | 2.067999  | 0.509959 |
| H | -5.88422  | 1.773753  | 0.685261 |
| C | -2.69036  | -0.24378  | -3.9013  |
| H | -3.35128  | 0.3501    | -4.52517 |
| C | -2.50511  | -1.68602  | 3.65809  |
| H | -2.48167  | -1.40689  | 4.707019 |
| C | -3.11654  | -3.25221  | 1.916753 |
| H | -3.57065  | -4.19014  | 1.61149  |
| C | -3.08556  | -2.89463  | 3.265634 |
| H | -3.514979 | -3.556273 | 4.011793 |

---

## H<sub>2</sub>O

$E$  at B3LYP/6-31G\*\* = -76.4197455013 Hartree

$E$  at B3LYP/SDD + 6-31G\*\*//B3LYP/6-31G\*\* = -76.4181668163 Hartree

| Atom | X        | Y         | Z         |
|------|----------|-----------|-----------|
| O    | 0.000000 | 0.000000  | 0.119179  |
| H    | 0.000000 | 0.759326  | -0.476716 |
| H    | 0.000000 | -0.759326 | -0.47671  |

---

## H<sub>2</sub>O-adduct in **1**

$E$  at B3LYP/6-31G\*\* = -5225.10094352 Hartree

$E$  at B3LYP/SDD + 6-31G\*\*//B3LYP/6-31G\*\* = -2997.44463240 Hartree

| Atom | X | Y | Z |
|------|---|---|---|
|------|---|---|---|

---

---

|    |          |          |          |
|----|----------|----------|----------|
| Cl | 5.288439 | 1.555962 | -0.15456 |
| Cl | 2.521649 | 3.172197 | -0.19568 |
| Cl | 2.42554  | -3.10578 | -0.72228 |
| Cl | 5.240389 | -1.60448 | -0.41481 |
| O  | 0.12186  | -1.18408 | -0.7897  |
| O  | 0.162624 | 1.349163 | -0.56751 |
| C  | -2.50953 | 1.530388 | -0.42404 |
| C  | 1.360351 | 0.763507 | -0.51351 |
| C  | -2.50756 | -1.46398 | -0.34087 |
| C  | 1.343556 | -0.63961 | -0.6448  |
| C  | 3.75488  | -0.69176 | -0.45232 |
| C  | 2.525938 | -1.36907 | -0.59544 |
| C  | -2.17422 | 2.846505 | -0.07334 |
| H  | -1.1907  | 3.071174 | 0.320023 |
| C  | 3.775419 | 0.707757 | -0.33351 |
| C  | 2.568473 | 1.436166 | -0.35819 |
| C  | -3.75313 | 1.272506 | -1.01036 |
| H  | -4.01413 | 0.270008 | -1.32706 |
| C  | -0.83372 | -0.08269 | 1.726931 |
| C  | -0.25997 | -1.27976 | 2.174016 |
| H  | -0.08039 | -2.08684 | 1.472026 |
| C  | -3.40284 | -1.65849 | 0.717223 |
| H  | -3.3759  | -1.00762 | 1.585871 |
| C  | -2.55291 | -2.30484 | -1.45258 |
| H  | -1.8733  | -2.15536 | -2.28117 |
| C  | -1.07324 | 0.957939 | 2.627125 |
| H  | -1.52971 | 1.882919 | 2.294414 |
| C  | -3.09772 | 3.876522 | -0.25416 |
| H  | -2.83172 | 4.889963 | 0.031017 |
| C  | -4.33386 | -2.6956  | 0.66461  |
| H  | -5.02329 | -2.84361 | 1.490483 |
| C  | -4.37198 | -3.54247 | -0.4443  |
| H  | -5.09423 | -4.35244 | -0.48495 |
| C  | -4.34855 | 3.607919 | -0.81163 |
| H  | -5.06396 | 4.412048 | -0.9566  |
| C  | -4.67036 | 2.30637  | -1.19762 |

|    |          |          |           |
|----|----------|----------|-----------|
| H  | -5.63307 | 2.093991 | -1.65274  |
| C  | -3.48311 | -3.34433 | -1.50206  |
| H  | -3.51142 | -3.99926 | -2.36774  |
| C  | -0.73181 | 0.80478  | 3.971733  |
| H  | -0.9191  | 1.614763 | 4.670172  |
| C  | 0.083971 | -1.42618 | 3.515986  |
| H  | 0.536324 | -2.35202 | 3.858004  |
| C  | -0.14969 | -0.38352 | 4.415357  |
| H  | 0.119607 | -0.49826 | 5.461126  |
| O  | -1.21972 | 0.249076 | -2.76231  |
| H  | -0.45317 | -0.34335 | -2.71599  |
| As | -1.26598 | 0.039249 | -0.15202  |
| H  | -0.84537 | 1.122643 | -2.565067 |

---

### TS1 in 1

$E$  at B3LYP/6-31G\*\* = -5225.10094352 Hartree

Imaginary frequency: 970.7  $\text{icm}^{-1}$

$E$  at B3LYP/SDD + 6-31G\*\*//B3LYP/6-31G\*\* = -2997.44463240 Hartree

| Atom | X        | Y        | Z        |
|------|----------|----------|----------|
| Cl   | 5.093017 | 1.789333 | -0.02333 |
| Cl   | 2.2189   | 3.165431 | -0.26102 |
| Cl   | 2.694135 | -3.07911 | -0.84067 |
| Cl   | 5.331482 | -1.35761 | -0.29523 |
| O    | 0.249796 | -1.40836 | -1.07413 |
| O    | 0.06719  | 1.238547 | -0.86666 |
| C    | -2.64346 | 1.531261 | -0.35377 |
| C    | 1.284594 | 0.685024 | -0.75535 |
| C    | -2.65182 | -1.46438 | -0.21971 |
| C    | 1.394596 | -0.71886 | -0.87431 |
| C    | 3.782843 | -0.57406 | -0.46034 |
| C    | 2.632411 | -1.34248 | -0.71413 |
| C    | -3.49816 | 1.654178 | -1.45624 |
| H    | -3.4373  | 0.940442 | -2.27027 |
| C    | 3.676748 | 0.823319 | -0.34198 |
| C    | 2.422948 | 1.445079 | -0.46828 |



|    |          |          |          |
|----|----------|----------|----------|
| C  | -2.74869 | 2.437948 | 0.704546 |
| H  | -2.11066 | 2.346105 | 1.575202 |
| C  | -0.61506 | -0.10569 | 1.476105 |
| C  | -0.61817 | -1.35671 | 2.099305 |
| H  | -1.08644 | -2.20908 | 1.621515 |
| C  | -2.42829 | -2.70752 | -0.81477 |
| H  | -1.52539 | -2.89555 | -1.38091 |
| C  | -3.80241 | -1.25719 | 0.549492 |
| H  | -3.98274 | -0.29867 | 1.025707 |
| C  | 0.052864 | 0.969106 | 2.077704 |
| H  | 0.131794 | 1.919323 | 1.560874 |
| C  | -4.42806 | 2.691106 | -1.50891 |
| H  | -5.08294 | 2.782557 | -2.37019 |
| C  | -3.36669 | -3.72968 | -0.66031 |
| H  | -3.18981 | -4.69364 | -1.12801 |
| C  | -4.52178 | -3.51879 | 0.093881 |
| H  | -5.2492  | -4.31656 | 0.211291 |
| C  | -4.51913 | 3.605013 | -0.45743 |
| H  | -5.24454 | 4.412049 | -0.49916 |
| C  | -3.68251 | 3.473651 | 0.650947 |
| H  | -3.75415 | 4.175453 | 1.47632  |
| C  | -4.73602 | -2.28211 | 0.703601 |
| H  | -5.6289  | -2.1118  | 1.297851 |
| C  | 0.648737 | 0.809897 | 3.328048 |
| H  | 1.159545 | 1.648805 | 3.790721 |
| C  | -0.01491 | -1.51455 | 3.346795 |
| H  | -0.02175 | -2.48768 | 3.828427 |
| C  | 0.610438 | -0.43122 | 3.966095 |
| H  | 1.083719 | -0.55828 | 4.935207 |
| O  | -1.3637  | -0.26675 | -2.35184 |
| H  | -0.40982 | -0.95364 | -1.96108 |
| As | -1.40726 | 0.051123 | -0.30419 |
| H  | -0.96258 | 0.564791 | -2.65616 |

---

OH-adduct in **1**

$E$  at B3LYP/6-31G\*\* = -5225.08919297 Hartree

$E$  at B3LYP/SDD + 6-31G\*\*//B3LYP/6-31G\*\* = -2997.43577303 Hartree

| Atom | X        | Y        | Z        |
|------|----------|----------|----------|
| Cl   | 4.969118 | 1.96311  | 0.165494 |
| Cl   | 2.046019 | 3.126634 | -0.32044 |
| Cl   | 3.014444 | -3.05251 | -0.84632 |
| Cl   | 5.451388 | -1.15943 | -0.05635 |
| O    | 0.512695 | -1.65897 | -1.26905 |
| O    | 0.081521 | 1.11388  | -1.02794 |
| C    | -2.62322 | 1.612938 | -0.23378 |
| C    | 1.29494  | 0.593828 | -0.85838 |
| C    | -2.893   | -1.42083 | -0.24737 |
| C    | 1.540322 | -0.79693 | -0.98428 |
| C    | 3.873691 | -0.48574 | -0.36564 |
| C    | 2.805031 | -1.32584 | -0.7206  |
| C    | -3.29889 | 2.102019 | -1.35728 |
| H    | -3.21238 | 1.5862   | -2.30717 |
| C    | 3.65695  | 0.899007 | -0.26908 |
| C    | 2.378162 | 1.422788 | -0.5052  |
| C    | -2.76796 | 2.263358 | 0.99566  |
| H    | -2.26133 | 1.892993 | 1.879415 |
| C    | -0.61364 | -0.30813 | 1.261466 |
| C    | -0.60794 | -1.5836  | 1.829553 |
| H    | -1.12812 | -2.40554 | 1.353522 |
| C    | -2.65943 | -2.67505 | -0.82183 |
| H    | -1.76005 | -2.85763 | -1.39882 |
| C    | -4.04605 | -1.21626 | 0.515449 |
| H    | -4.23765 | -0.25088 | 0.974147 |
| C    | 0.094752 | 0.736917 | 1.868546 |
| H    | 0.130805 | 1.712538 | 1.39695  |
| C    | -4.08971 | 3.245202 | -1.2564  |
| H    | -4.60456 | 3.621324 | -2.13511 |
| C    | -3.58288 | -3.70669 | -0.65176 |
| H    | -3.39607 | -4.67682 | -1.10269 |
| C    | -4.74173 | -3.49358 | 0.0974   |
| H    | -5.46115 | -4.29665 | 0.227388 |

|    |          |          |          |
|----|----------|----------|----------|
| C  | -4.2217  | 3.899732 | -0.03062 |
| H  | -4.83896 | 4.789721 | 0.046869 |
| C  | -3.56561 | 3.403552 | 1.095995 |
| H  | -3.66938 | 3.903482 | 2.054124 |
| C  | -4.97141 | -2.2479  | 0.6823   |
| H  | -5.87041 | -2.07643 | 1.26704  |
| C  | 0.771198 | 0.513117 | 3.066201 |
| H  | 1.31599  | 1.326926 | 3.534643 |
| C  | 0.085734 | -1.80549 | 3.019729 |
| H  | 0.09731  | -2.79955 | 3.456113 |
| C  | 0.769658 | -0.75955 | 3.640831 |
| H  | 1.311318 | -0.93817 | 4.564875 |
| O  | -1.57977 | -0.26131 | -2.24159 |
| H  | -0.07735 | -1.27492 | -1.95233 |
| As | -1.57993 | 0.018153 | -0.41354 |
| H  | -1.01622 | 0.47164  | -2.54968 |

---

### TS2 in 1

$E$  at B3LYP/6-31G\*\* = -5225.08422702 Hartree

Imaginary frequency: 270.8  $\text{icm}^{-1}$

$E$  at B3LYP/SDD + 6-31G\*\*//B3LYP/6-31G\*\* = -2997.43261389 Hartree

| Atom | X        | Y        | Z        |
|------|----------|----------|----------|
| Cl   | 2.115912 | 3.054819 | -0.17639 |
| Cl   | 3.093494 | -3.10854 | -0.83145 |
| Cl   | 5.561014 | -1.21404 | -0.10369 |
| O    | 0.534544 | -1.70155 | -1.08688 |
| O    | 0.164344 | 1.061351 | -0.94586 |
| C    | -2.46709 | 1.721509 | -0.25521 |
| C    | 1.352866 | 0.530484 | -0.74294 |
| C    | -3.11469 | -1.28178 | -0.35984 |
| C    | 1.606778 | -0.86022 | -0.85068 |
| C    | 3.965991 | -0.54685 | -0.32979 |
| C    | 2.885233 | -1.38208 | -0.64974 |
| C    | -2.77503 | 2.468516 | -1.39572 |
| H    | -2.55218 | 2.066351 | -2.37779 |

|    |          |          |          |
|----|----------|----------|----------|
| C  | 3.733435 | 0.833312 | -0.18909 |
| C  | 2.447571 | 1.353949 | -0.38179 |
| C  | -2.769   | 2.233011 | 1.010576 |
| H  | -2.5279  | 1.669306 | 1.905623 |
| C  | -0.77307 | -0.45728 | 1.210817 |
| C  | -0.86562 | -1.75071 | 1.7275   |
| H  | -1.39615 | -2.52479 | 1.186194 |
| C  | -3.02458 | -2.49938 | -1.04327 |
| H  | -2.18174 | -2.68674 | -1.69923 |
| C  | -4.208   | -1.04893 | 0.479323 |
| H  | -4.29359 | -0.11146 | 1.020939 |
| C  | -0.06967 | 0.535673 | 1.902895 |
| H  | 0.024996 | 1.526499 | 1.472958 |
| C  | -3.37502 | 3.720143 | -1.27011 |
| H  | -3.60673 | 4.297082 | -2.16021 |
| C  | -4.02503 | -3.46218 | -0.90618 |
| H  | -3.94843 | -4.40178 | -1.44556 |
| C  | -5.12134 | -3.21681 | -0.07759 |
| H  | -5.90179 | -3.96458 | 0.028302 |
| C  | -3.67566 | 4.229493 | -0.00541 |
| H  | -4.14324 | 5.204885 | 0.090363 |
| C  | -3.37715 | 3.482706 | 1.134401 |
| H  | -3.60893 | 3.87317  | 2.120683 |
| C  | -5.21255 | -2.00786 | 0.61402  |
| H  | -6.06481 | -1.81044 | 1.257618 |
| C  | 0.518511 | 0.236129 | 3.130348 |
| H  | 1.060687 | 1.007661 | 3.668304 |
| C  | -0.25816 | -2.04819 | 2.947676 |
| H  | -0.31895 | -3.05637 | 3.346049 |
| C  | 0.428336 | -1.05669 | 3.650738 |
| H  | 0.900053 | -1.29322 | 4.599853 |
| O  | -1.53845 | -0.24865 | -2.24374 |
| H  | 0.584034 | -2.06118 | -1.98372 |
| As | -1.65071 | 0.002454 | -0.4731  |
| H  | -0.74139 | 0.267795 | -2.45858 |
| Cl | 2.115912 | 3.054819 | -0.17639 |

---

OH-adduct isomer in **1**

$E$  at B3LYP/6-31G\*\* = -5225.09302427 Hartree

$E$  at B3LYP/SDD + 6-31G\*\*//B3LYP/6-31G\*\* = -2997.44978668 Hartree

| Atom | X        | Y        | Z        |
|------|----------|----------|----------|
| Cl   | 4.3136   | 2.214846 | 0.98642  |
| Cl   | 1.418334 | 2.940601 | -0.12033 |
| Cl   | 3.711835 | -2.82106 | -1.11917 |
| Cl   | 5.477733 | -0.70234 | 0.496828 |
| O    | 1.096344 | -1.70889 | -2.04363 |
| O    | 0.133049 | 0.715231 | -1.58226 |
| C    | -2.36502 | 1.60355  | -0.2662  |
| C    | 1.335959 | 0.453383 | -1.15713 |
| C    | -3.39892 | -1.20541 | 0.016725 |
| C    | 1.900088 | -0.83576 | -1.37304 |
| C    | 3.917779 | -0.24276 | -0.13796 |
| C    | 3.148797 | -1.17125 | -0.86336 |
| C    | -1.88391 | 2.653627 | -1.05528 |
| H    | -1.13173 | 2.456894 | -1.8062  |
| C    | 3.398446 | 1.041275 | 0.069025 |
| C    | 2.129194 | 1.373799 | -0.43433 |
| C    | -3.29441 | 1.859748 | 0.752196 |
| H    | -3.69025 | 1.053861 | 1.360579 |
| C    | -0.53005 | -0.79421 | 0.795077 |
| C    | -0.1112  | -2.1278  | 0.80333  |
| H    | -0.53811 | -2.83575 | 0.10036  |
| C    | -4.43538 | -1.38441 | -0.908   |
| H    | -4.32129 | -1.01736 | -1.92265 |
| C    | -3.54862 | -1.69546 | 1.318656 |
| H    | -2.75088 | -1.57391 | 2.044915 |
| C    | 0.018254 | 0.14145  | 1.673924 |
| H    | -0.28645 | 1.181774 | 1.628723 |
| C    | -2.34712 | 3.94986  | -0.83221 |
| H    | -1.97464 | 4.760871 | -1.45027 |
| C    | -5.60159 | -2.0505  | -0.53503 |

|    |          |          |          |
|----|----------|----------|----------|
| H  | -6.397   | -2.19159 | -1.26059 |
| C  | -5.74544 | -2.53663 | 0.766652 |
| H  | -6.65518 | -3.05469 | 1.055391 |
| C  | -3.26377 | 4.208335 | 0.187804 |
| H  | -3.61137 | 5.222238 | 0.362973 |
| C  | -3.73305 | 3.162828 | 0.983871 |
| H  | -4.44529 | 3.356071 | 1.780163 |
| C  | -4.71862 | -2.35813 | 1.693695 |
| H  | -4.82369 | -2.73767 | 2.705669 |
| C  | 1.008956 | -0.26491 | 2.567678 |
| H  | 1.460273 | 0.461514 | 3.2357   |
| C  | 0.879313 | -2.52398 | 1.699154 |
| H  | 1.226333 | -3.55232 | 1.700862 |
| C  | 1.442547 | -1.59158 | 2.575125 |
| H  | 2.230642 | -1.89853 | 3.255514 |
| O  | -1.74928 | -0.85868 | -2.12516 |
| H  | 1.567473 | -2.54859 | -2.15088 |
| As | -1.80892 | -0.22758 | -0.49652 |
| H  | -0.8844  | -0.48935 | -2.43264 |

---

### Oxide product in 1

$E$  at B3LYP/6-31G\*\* = -5225.09954107 Hartree

$E$  at B3LYP/SDD + 6-31G\*\*//B3LYP/6-31G\*\* = -2997.46104781 Hartree

| Atom | X        | Y        | Z        |
|------|----------|----------|----------|
| Cl   | 4.009803 | 2.001256 | 1.311447 |
| Cl   | 1.508665 | 2.935193 | -0.4148  |
| Cl   | 3.746095 | -2.87627 | -1.18505 |
| Cl   | 5.115703 | -0.95231 | 0.959556 |
| O    | 1.47664  | -1.58291 | -2.64084 |
| O    | 0.513014 | 0.901119 | -2.25152 |
| C    | -2.70132 | 1.485699 | -0.37115 |
| C    | 1.57083  | 0.491621 | -1.54584 |
| C    | -3.21032 | -1.52338 | 0.171951 |
| C    | 2.099905 | -0.80656 | -1.72458 |
| C    | 3.794929 | -0.37311 | -0.02079 |

|   |          |          |          |
|---|----------|----------|----------|
| C | 3.189281 | -1.22477 | -0.95821 |
| C | -2.07682 | 2.544152 | -1.04426 |
| H | -1.17117 | 2.370136 | -1.61541 |
| C | 3.297706 | 0.926151 | 0.137927 |
| C | 2.194097 | 1.345946 | -0.62585 |
| C | -3.86189 | 1.71414  | 0.376697 |
| H | -4.35076 | 0.896711 | 0.89784  |
| C | -0.53468 | -0.26382 | 0.909413 |
| C | 0.293373 | -1.38953 | 1.001109 |
| H | 0.160516 | -2.21293 | 0.305025 |
| C | -3.92206 | -2.26557 | -0.77513 |
| H | -3.70331 | -2.12928 | -1.82986 |
| C | -3.44811 | -1.71281 | 1.537191 |
| H | -2.87672 | -1.15685 | 2.275352 |
| C | -0.35942 | 0.817255 | 1.776515 |
| H | -0.98956 | 1.696015 | 1.691641 |
| C | -2.62437 | 3.824808 | -0.97064 |
| H | -2.14061 | 4.644323 | -1.49332 |
| C | -4.88304 | -3.18466 | -0.35462 |
| H | -5.43383 | -3.76426 | -1.08916 |
| C | -5.13194 | -3.36216 | 1.00825  |
| H | -5.88081 | -4.07855 | 1.332917 |
| C | -3.78468 | 4.052732 | -0.22766 |
| H | -4.20693 | 5.051933 | -0.1738  |
| C | -4.404   | 2.997887 | 0.445073 |
| H | -5.30755 | 3.172411 | 1.021541 |
| C | -4.41417 | -2.62797 | 1.954867 |
| H | -4.59931 | -2.77463 | 3.014706 |
| C | 0.65749  | 0.774683 | 2.732167 |
| H | 0.813803 | 1.622204 | 3.391705 |
| C | 1.306224 | -1.4264  | 1.955867 |
| H | 1.967445 | -2.28521 | 2.012325 |
| C | 1.48838  | -0.34248 | 2.819595 |
| H | 2.293959 | -0.36263 | 3.546695 |
| O | -1.38217 | -0.7368  | -1.94896 |
| H | 1.885819 | -2.46079 | -2.6496  |

|    |          |          |          |
|----|----------|----------|----------|
| As | -1.9029  | -0.26376 | -0.43222 |
| H  | -0.20217 | 0.159351 | -2.3019  |

---

## Hydrolysis of 4

**4**

$E$  at B3LYP/6-31G\*\* = -5147.45799733 Hartree

$E$  at B3LYP/SDD + 6-31G\*\*//B3LYP/6-31G\*\* = -2919.81551537 Hartree

| Atom | X        | Y        | Z        |
|------|----------|----------|----------|
| As   | -1.20424 | 0.011748 | -0.12496 |
| Cl   | 2.478761 | -3.16684 | -0.5223  |
| Cl   | 5.280956 | -1.61383 | -0.49888 |
| Cl   | 5.29564  | 1.557641 | -0.49862 |
| Cl   | 2.504712 | 3.134812 | -0.5273  |
| O    | 0.147457 | -1.27219 | -0.58648 |
| O    | 0.158289 | 1.265045 | -0.60089 |
| C    | -2.54396 | -1.31548 | -0.54137 |
| C    | -2.40371 | -2.69913 | -0.58429 |
| C    | -3.52227 | -3.49643 | -0.84055 |
| C    | -4.76625 | -2.89995 | -1.05678 |
| C    | -4.90451 | -1.51119 | -1.03132 |
| C    | -3.78892 | -0.70734 | -0.78042 |
| C    | -3.78337 | 0.776875 | -0.75935 |
| C    | -4.89469 | 1.595985 | -0.97856 |
| C    | -4.74631 | 2.983647 | -0.95979 |
| C    | -3.49732 | 3.563439 | -0.72676 |
| C    | -2.38407 | 2.750718 | -0.49839 |
| C    | -2.53375 | 1.368339 | -0.50588 |
| C    | -0.89781 | -0.00716 | 1.765065 |
| C    | -0.3928  | 1.14124  | 2.38343  |
| C    | -0.11544 | 1.125152 | 3.749484 |
| C    | -0.33529 | -0.03629 | 4.49301  |
| C    | -0.82863 | -1.1852  | 3.871186 |
| C    | -1.10602 | -1.17452 | 2.504692 |
| C    | 1.362656 | -0.71639 | -0.55383 |



|   |          |           |          |
|---|----------|-----------|----------|
| C | 1.372122 | 0.691617  | -0.56494 |
| C | 2.570858 | 1.391825  | -0.54286 |
| C | 3.788752 | 0.680428  | -0.5266  |
| C | 3.781553 | -0.72407  | -0.52401 |
| C | 2.557754 | -1.4253   | -0.53735 |
| H | -1.42948 | -3.15038  | -0.43624 |
| H | -3.42103 | -4.5765   | -0.87855 |
| H | -5.63538 | -3.51954  | -1.25685 |
| H | -5.87674 | -1.0645   | -1.21228 |
| H | -5.87123 | 1.162549  | -1.1687  |
| H | -5.61139 | 3.615842  | -1.13645 |
| H | -3.38912 | 4.643555  | -0.7278  |
| H | -1.40803 | 3.192235  | -0.33411 |
| H | -0.20172 | 2.032955  | 1.795932 |
| H | 0.279234 | 2.015043  | 4.230061 |
| H | -0.11676 | -0.04785  | 5.556651 |
| H | -0.9916  | -2.09068  | 4.447599 |
| H | -1.48567 | -2.068454 | 2.020923 |

---

#### H<sub>2</sub>O-adduct in 4

$E$  at B3LYP/6-31G\*\* = -5223.90244605 Hartree

$E$  at B3LYP/SDD + 6-31G\*\*//B3LYP/6-31G\*\* = -2996.25370316 Hartree

| Atom | X        | Y        | Z        |
|------|----------|----------|----------|
| As   | -1.16032 | -0.02159 | -0.10266 |
| Cl   | 2.512068 | -3.17797 | -0.44272 |
| Cl   | 5.321275 | -1.64294 | -0.39339 |
| Cl   | 5.35614  | 1.52875  | -0.40418 |
| Cl   | 2.574104 | 3.121183 | -0.47867 |
| O    | 0.195437 | -1.28358 | -0.54904 |
| O    | 0.217361 | 1.274159 | -0.57954 |
| C    | -2.52627 | -1.34196 | -0.40404 |
| C    | -2.38884 | -2.72288 | -0.47896 |
| C    | -3.52203 | -3.51818 | -0.66861 |
| C    | -4.77856 | -2.92166 | -0.79446 |
| C    | -4.91442 | -1.53378 | -0.74419 |

|   |          |          |          |
|---|----------|----------|----------|
| C | -3.78375 | -0.73231 | -0.55774 |
| C | -3.77835 | 0.752281 | -0.53119 |
| C | -4.90174 | 1.57505  | -0.66972 |
| C | -4.7522  | 2.962693 | -0.66142 |
| C | -3.48981 | 3.543183 | -0.51672 |
| C | -2.36203 | 2.730784 | -0.36885 |
| C | -2.51441 | 1.348848 | -0.3681  |
| C | -0.81479 | 0.000968 | 1.792904 |
| C | -0.27782 | 1.152483 | 2.378551 |
| C | 0.005546 | 1.171675 | 3.743278 |
| C | -0.23743 | 0.039552 | 4.523505 |
| C | -0.76197 | -1.11405 | 3.937787 |
| C | -1.04578 | -1.13621 | 2.572484 |
| C | 1.406787 | -0.72386 | -0.50509 |
| C | 1.427062 | 0.68526  | -0.52275 |
| C | 2.630798 | 1.376562 | -0.48097 |
| C | 3.844753 | 0.659792 | -0.44696 |
| C | 3.82785  | -0.74429 | -0.4393  |
| C | 2.599922 | -1.43737 | -0.46719 |
| H | -1.40646 | -3.17384 | -0.39926 |
| H | -3.42294 | -4.59758 | -0.72726 |
| H | -5.65871 | -3.54016 | -0.94291 |
| H | -5.89619 | -1.08524 | -0.8571  |
| H | -5.8903  | 1.142882 | -0.78749 |
| H | -5.62802 | 3.594744 | -0.77381 |
| H | -3.38363 | 4.623605 | -0.52219 |
| H | -1.37668 | 3.170893 | -0.26489 |
| H | -0.07128 | 2.025183 | 1.768822 |
| H | 0.423789 | 2.066249 | 4.194671 |
| H | -0.01364 | 0.054464 | 5.586077 |
| H | -0.94477 | -1.99816 | 4.540998 |
| H | -1.45073 | -2.03579 | 2.12048  |
| O | -1.1415  | 0.184114 | -2.73103 |
| H | -1.98154 | 0.644381 | -2.86616 |
| H | -0.51506 | 0.894468 | -2.5166  |

---

TS1 in 4

$E$  at B3LYP/6-31G\*\* = -5223.87713749 Hartree

Imaginary frequency: 825.9  $\text{icm}^{-1}$

$E$  at B3LYP/SDD + 6-31G\*\*//B3LYP/6-31G\*\* = -2996.22319335 Hartree

| Atom | X        | Y        | Z        |
|------|----------|----------|----------|
| As   | 1.297333 | 0.028693 | -0.39709 |
| Cl   | -5.39053 | -1.37408 | -0.14112 |
| Cl   | -2.76407 | -3.135   | -0.6168  |
| Cl   | -2.26776 | 3.132073 | -0.44439 |
| Cl   | -5.13958 | 1.782821 | -0.07948 |
| O    | -0.13427 | 1.168735 | -0.95813 |
| O    | -0.3191  | -1.49524 | -0.99918 |
| C    | 2.659172 | -1.34809 | -0.25382 |
| C    | -1.46641 | -0.78306 | -0.82545 |
| C    | 2.662003 | 1.337516 | -0.40906 |
| C    | -1.34308 | 0.6237   | -0.77877 |
| C    | -3.73044 | 0.794409 | -0.35363 |
| C    | -2.47772 | 1.40398  | -0.53816 |
| C    | 2.517887 | -2.72943 | -0.25407 |
| H    | 1.539472 | -3.1808  | -0.38557 |
| C    | -3.84398 | -0.607   | -0.38328 |
| C    | -2.69876 | -1.3933  | -0.60396 |
| C    | 3.922954 | -0.73716 | -0.12397 |
| C    | 0.581084 | -0.00327 | 1.419452 |
| C    | 0.394371 | 1.203503 | 2.100614 |
| H    | 0.659933 | 2.143981 | 1.629203 |
| C    | 2.529106 | 2.711147 | -0.55805 |
| H    | 1.550415 | 3.145222 | -0.73291 |
| C    | 3.924636 | 0.7453   | -0.20745 |
| C    | 0.195888 | -1.20835 | 2.009764 |
| H    | 0.302252 | -2.14003 | 1.466098 |
| C    | 3.651117 | -3.53208 | -0.09405 |
| H    | 3.556452 | -4.61358 | -0.09246 |
| C    | 3.663237 | 3.52335  | -0.48777 |
| H    | 3.570305 | 4.598471 | -0.6043  |

|   |          |          |          |
|---|----------|----------|----------|
| C | 4.9173   | 2.94749  | -0.27129 |
| H | 5.798895 | 3.579051 | -0.21498 |
| C | 4.906602 | -2.93963 | 0.061723 |
| H | 5.786008 | -3.56356 | 0.189762 |
| C | 5.048529 | -1.55116 | 0.043668 |
| H | 6.034548 | -1.11112 | 0.154841 |
| C | 5.054662 | 1.56521  | -0.1351  |
| H | 6.038403 | 1.135221 | 0.023445 |
| C | -0.34192 | -1.21097 | 3.296685 |
| H | -0.64441 | -2.1486  | 3.753193 |
| C | -0.13954 | 1.198132 | 3.388681 |
| H | -0.27881 | 2.135349 | 3.919049 |
| C | -0.50711 | -0.00895 | 3.987191 |
| H | -0.93066 | -0.01137 | 4.987164 |
| O | 1.206866 | -0.39147 | -2.39914 |
| H | 1.973343 | -0.95049 | -2.60243 |
| H | 0.279131 | -1.12733 | -1.92361 |

---

#### OH-adduct in 4

$E$  at B3LYP/6-31G\*\* = -5223.87971920 Hartree

$E$  at B3LYP/SDD + 6-31G\*\*//B3LYP/6-31G\*\* = -2996.23686687 Hartree

| Atom | X        | Y        | Z        |
|------|----------|----------|----------|
| As   | 1.26154  | -0.10698 | -0.17779 |
| Cl   | -5.9635  | -0.15856 | -0.80692 |
| Cl   | -4.15484 | -2.76031 | -0.40761 |
| Cl   | -1.56923 | 2.902417 | 0.392442 |
| Cl   | -4.65556 | 2.71004  | -0.4083  |
| O    | -0.33187 | 0.299924 | 0.903691 |
| O    | -1.34071 | -2.11418 | 0.390586 |
| C    | 2.823062 | -0.20177 | -1.39355 |
| C    | -2.16494 | -1.05086 | 0.232951 |
| C    | 2.154847 | 1.391701 | 0.653438 |
| C    | -1.58256 | 0.215487 | 0.461058 |
| C    | -3.71201 | 1.263862 | -0.15682 |
| C    | -2.3617  | 1.35717  | 0.225744 |

|   |          |          |          |
|---|----------|----------|----------|
| C | 3.033094 | -1.02501 | -2.49785 |
| H | 2.266243 | -1.72642 | -2.81883 |
| C | -4.29044 | 0.000865 | -0.343   |
| C | -3.50148 | -1.14748 | -0.15329 |
| C | 3.81171  | 0.724352 | -1.02238 |
| C | 1.551298 | -1.72026 | 0.83731  |
| C | 1.325111 | -1.69663 | 2.217994 |
| H | 0.954601 | -0.7939  | 2.687863 |
| C | 1.684396 | 2.172062 | 1.705145 |
| H | 0.683426 | 2.014695 | 2.082557 |
| C | 3.441862 | 1.59459  | 0.118271 |
| C | 1.990836 | -2.89647 | 0.226406 |
| H | 2.181998 | -2.92698 | -0.83949 |
| C | 4.228084 | -0.95309 | -3.22006 |
| H | 4.384988 | -1.59676 | -4.08032 |
| C | 2.503855 | 3.16718  | 2.242547 |
| H | 2.140245 | 3.784312 | 3.058213 |
| C | 3.785534 | 3.368781 | 1.72709  |
| H | 4.423112 | 4.14174  | 2.146119 |
| C | 5.217493 | -0.04922 | -2.82987 |
| H | 6.14881  | 0.008608 | -3.38527 |
| C | 5.011921 | 0.793916 | -1.73729 |
| H | 5.783094 | 1.504209 | -1.45653 |
| C | 4.255577 | 2.589254 | 0.670134 |
| H | 5.252796 | 2.76221  | 0.27865  |
| C | 2.198668 | -4.04603 | 0.989527 |
| H | 2.533096 | -4.95909 | 0.506038 |
| C | 1.552804 | -2.84003 | 2.980756 |
| H | 1.383493 | -2.81304 | 4.053006 |
| C | 1.984851 | -4.01807 | 2.367804 |
| H | 2.154446 | -4.91073 | 2.962752 |
| O | 0.106315 | -0.15883 | -1.55242 |
| H | 0.622319 | -0.0033  | -2.35585 |
| H | -1.83132 | -2.92708 | 0.197553 |

---

TS2 in 4

$E$  at B3LYP/6-31G\*\* = -5223.87633707 Hartree

Imaginary frequency: 231.5  $\text{icm}^{-1}$

$E$  at B3LYP/SDD + 6-31G\*\*//B3LYP/6-31G\*\* = -2996.23071945 Hartree

| Atom | X        | Y        | Z        |
|------|----------|----------|----------|
| As   | 1.26154  | -0.10698 | -0.17779 |
| Cl   | -5.9635  | -0.15856 | -0.80692 |
| Cl   | -4.15484 | -2.76031 | -0.40761 |
| Cl   | -1.56923 | 2.902417 | 0.392442 |
| Cl   | -4.65556 | 2.71004  | -0.4083  |
| O    | -0.33187 | 0.299924 | 0.903691 |
| O    | -1.34071 | -2.11418 | 0.390586 |
| C    | 2.823062 | -0.20177 | -1.39355 |
| C    | -2.16494 | -1.05086 | 0.232951 |
| C    | 2.154847 | 1.391701 | 0.653438 |
| C    | -1.58256 | 0.215487 | 0.461058 |
| C    | -3.71201 | 1.263862 | -0.15682 |
| C    | -2.3617  | 1.35717  | 0.225744 |
| C    | 3.033094 | -1.02501 | -2.49785 |
| H    | 2.266243 | -1.72642 | -2.81883 |
| C    | -4.29044 | 0.000865 | -0.343   |
| C    | -3.50148 | -1.14748 | -0.15329 |
| C    | 3.81171  | 0.724352 | -1.02238 |
| C    | 1.551298 | -1.72026 | 0.83731  |
| C    | 1.325111 | -1.69663 | 2.217994 |
| H    | 0.954601 | -0.7939  | 2.687863 |
| C    | 1.684396 | 2.172062 | 1.705145 |
| H    | 0.683426 | 2.014695 | 2.082557 |
| C    | 3.441862 | 1.59459  | 0.118271 |
| C    | 1.990836 | -2.89647 | 0.226406 |
| H    | 2.181998 | -2.92698 | -0.83949 |
| C    | 4.228084 | -0.95309 | -3.22006 |
| H    | 4.384988 | -1.59676 | -4.08032 |
| C    | 2.503855 | 3.16718  | 2.242547 |
| H    | 2.140245 | 3.784312 | 3.058213 |
| C    | 3.785534 | 3.368781 | 1.72709  |

|   |          |          |          |
|---|----------|----------|----------|
| H | 4.423112 | 4.14174  | 2.146119 |
| C | 5.217493 | -0.04922 | -2.82987 |
| H | 6.14881  | 0.008608 | -3.38527 |
| C | 5.011921 | 0.793916 | -1.73729 |
| H | 5.783094 | 1.504209 | -1.45653 |
| C | 4.255577 | 2.589254 | 0.670134 |
| H | 5.252796 | 2.76221  | 0.27865  |
| C | 2.198668 | -4.04603 | 0.989527 |
| H | 2.533096 | -4.95909 | 0.506038 |
| C | 1.552804 | -2.84003 | 2.980756 |
| H | 1.383493 | -2.81304 | 4.053006 |
| C | 1.984851 | -4.01807 | 2.367804 |
| H | 2.154446 | -4.91073 | 2.962752 |
| O | 0.106315 | -0.15883 | -1.55242 |
| H | 0.622319 | -0.0033  | -2.35585 |
| H | -1.83132 | -2.92708 | 0.197553 |

---

#### OH-adduct isomer in 4

$E$  at B3LYP/6-31G\*\* = -5223.89805962 Hartree

$E$  at B3LYP/SDD + 6-31G\*\*//B3LYP/6-31G\*\* = -2996.25339016 Hartree

| Atom | X        | Y        | Z        |
|------|----------|----------|----------|
| As   | 1.537741 | -0.39089 | -0.50808 |
| Cl   | -5.57599 | -0.21958 | 0.386433 |
| Cl   | -4.24315 | -2.08518 | -1.83844 |
| Cl   | -0.94231 | 2.710229 | 0.514655 |
| Cl   | -3.89982 | 2.206379 | 1.567162 |
| O    | -0.04047 | 0.705317 | -1.46546 |
| O    | -1.46024 | -1.27956 | -2.53329 |
| C    | 3.139482 | -1.29263 | 0.120017 |
| C    | -2.07488 | -0.49296 | -1.60041 |
| C    | 2.596053 | 1.203033 | -0.66919 |
| C    | -1.28454 | 0.556948 | -1.06802 |
| C    | -3.21029 | 1.170734 | 0.343829 |
| C    | -1.90233 | 1.395963 | -0.11626 |
| C    | 3.275703 | -2.61761 | 0.51256  |

|   |          |          |          |
|---|----------|----------|----------|
| H | 2.429319 | -3.2964  | 0.463929 |
| C | -3.95641 | 0.101716 | -0.17216 |
| C | -3.37417 | -0.71674 | -1.15471 |
| C | 4.228384 | -0.41274 | 0.196539 |
| C | 0.372926 | -0.75585 | 0.966183 |
| C | 0.346291 | 0.049613 | 2.103683 |
| H | 0.980525 | 0.927501 | 2.170705 |
| C | 2.193009 | 2.459664 | -1.10735 |
| H | 1.170195 | 2.609964 | -1.42169 |
| C | 3.923038 | 0.968226 | -0.24653 |
| C | -0.45385 | -1.87811 | 0.859254 |
| H | -0.42245 | -2.48533 | -0.04013 |
| C | 4.51023  | -3.08124 | 0.97379  |
| H | 4.625698 | -4.11757 | 1.276693 |
| C | 3.117581 | 3.506279 | -1.13408 |
| H | 2.8101   | 4.488692 | -1.47804 |
| C | 4.430947 | 3.286625 | -0.7165  |
| H | 5.148944 | 4.101407 | -0.73505 |
| C | 5.597723 | -2.20686 | 1.047972 |
| H | 6.556662 | -2.56614 | 1.409563 |
| C | 5.463828 | -0.87213 | 0.663539 |
| H | 6.317032 | -0.20445 | 0.730896 |
| C | 4.835572 | 2.026059 | -0.27494 |
| H | 5.860566 | 1.871365 | 0.045775 |
| C | -1.33613 | -2.17841 | 1.896317 |
| H | -1.99736 | -3.03515 | 1.810589 |
| C | -0.53461 | -0.26105 | 3.139641 |
| H | -0.57299 | 0.37145  | 4.020873 |
| C | -1.37874 | -1.36827 | 3.033013 |
| H | -2.07541 | -1.59608 | 3.833826 |
| O | 1.264412 | -1.53642 | -1.817   |
| H | 0.462905 | -1.22975 | -2.28507 |
| H | -2.05633 | -1.99783 | -2.79406 |

---



$E$  at B3LYP/6-31G\*\* = -5223.88859656 Hartree

Imaginary frequency: 886.8  $\text{icm}^{-1}$

$E$  at B3LYP/SDD + 6-31G\*\*//B3LYP/6-31G\*\* = -2996.25056486 Hartree

| Atom | X        | Y        | Z        |
|------|----------|----------|----------|
| As   | 1.765921 | 0.538857 | 0.368114 |
| Cl   | -5.48866 | 0.399937 | -0.80706 |
| Cl   | -4.32558 | 2.502115 | 1.296828 |
| Cl   | -1.16069 | -2.80865 | 0.198006 |
| Cl   | -3.89155 | -2.29608 | -1.3285  |
| O    | -0.35586 | -0.58463 | 1.960543 |
| O    | -1.74251 | 1.640263 | 2.519196 |
| C    | 3.349115 | 1.40033  | -0.23116 |
| C    | -2.29095 | 0.760018 | 1.641766 |
| C    | 2.718715 | -1.0897  | 0.580613 |
| C    | -1.52431 | -0.4128  | 1.388931 |
| C    | -3.29533 | -1.12646 | -0.17555 |
| C    | -2.08432 | -1.35505 | 0.499651 |
| C    | 3.532967 | 2.719964 | -0.62071 |
| H    | 2.715145 | 3.432095 | -0.57047 |
| C    | -4.00811 | 0.056113 | 0.052154 |
| C    | -3.4929  | 0.983428 | 0.974565 |
| C    | 4.400069 | 0.462366 | -0.29719 |
| C    | 0.430693 | 0.493243 | -0.98356 |
| C    | 0.372285 | -0.53377 | -1.92721 |
| H    | 1.103632 | -1.33551 | -1.91296 |
| C    | 2.256925 | -2.30212 | 1.076307 |
| H    | 1.235104 | -2.38741 | 1.427    |
| C    | 4.052706 | -0.90881 | 0.155426 |
| C    | -0.53238 | 1.508611 | -0.95996 |
| H    | -0.49731 | 2.260151 | -0.17697 |
| C    | 4.789471 | 3.13096  | -1.07212 |
| H    | 4.948539 | 4.161969 | -1.37121 |
| C    | 3.14375  | -3.38125 | 1.132559 |
| H    | 2.805928 | -4.33753 | 1.518819 |
| C    | 4.461696 | -3.22786 | 0.696389 |
| H    | 5.144984 | -4.07076 | 0.740119 |

|   |          |          |          |
|---|----------|----------|----------|
| C | 5.838688 | 2.21137  | -1.1388  |
| H | 6.813838 | 2.531829 | -1.49276 |
| C | 5.651212 | 0.881826 | -0.75605 |
| H | 6.478444 | 0.182176 | -0.81662 |
| C | 4.922411 | -1.9998  | 0.214591 |
| H | 5.954655 | -1.90059 | -0.10527 |
| C | -1.56455 | 1.492244 | -1.89583 |
| H | -2.33294 | 2.25771  | -1.86585 |
| C | -0.66531 | -0.54323 | -2.85848 |
| H | -0.7366  | -1.35237 | -3.5778  |
| C | -1.63069 | 0.465773 | -2.84051 |
| H | -2.4527  | 0.438061 | -3.54864 |
| O | 1.133111 | 1.291788 | 1.760031 |
| H | 0.332086 | 0.483885 | 2.040152 |
| H | -2.32715 | 2.407833 | 2.603856 |

---

#### Oxide product in 4

$E$  at B3LYP/6-31G\*\* = -5223.89446384 Hartree

$E$  at B3LYP/SDD + 6-31G\*\*//B3LYP/6-31G\*\* = -2996.25801639 Hartree

| Atom | X        | Y        | Z        |
|------|----------|----------|----------|
| As   | 1.716381 | -0.61845 | -0.32553 |
| Cl   | -5.17657 | 0.390587 | 1.286489 |
| Cl   | -3.18263 | 2.865727 | 1.069057 |
| Cl   | -2.15157 | -2.21813 | -2.46256 |
| Cl   | -4.65065 | -2.17976 | -0.49799 |
| O    | -0.49367 | 0.261181 | -2.32176 |
| O    | -0.92314 | 2.390397 | -0.81002 |
| C    | 3.312241 | -1.29956 | 0.470797 |
| C    | -1.83011 | 1.385501 | -0.73906 |
| C    | 2.654866 | 0.974694 | -0.81544 |
| C    | -1.58228 | 0.250392 | -1.53828 |
| C    | -3.59099 | -0.79873 | -0.60604 |
| C    | -2.47985 | -0.82667 | -1.46882 |
| C    | 3.511133 | -2.5135  | 1.114067 |
| H    | 2.708499 | -3.24179 | 1.179942 |

|   |          |          |          |
|---|----------|----------|----------|
| C | -3.82971 | 0.334385 | 0.181822 |
| C | -2.95116 | 1.424676 | 0.092131 |
| C | 4.342515 | -0.34322 | 0.37912  |
| C | 0.445839 | -0.25157 | 1.056717 |
| C | 0.501296 | 0.905124 | 1.837877 |
| H | 1.279744 | 1.642868 | 1.667026 |
| C | 2.183725 | 2.077928 | -1.51763 |
| H | 1.164142 | 2.0952   | -1.88379 |
| C | 3.980512 | 0.907828 | -0.33465 |
| C | -0.56646 | -1.19718 | 1.248422 |
| H | -0.61117 | -2.06361 | 0.595106 |
| C | 4.762092 | -2.79954 | 1.666505 |
| H | 4.932308 | -3.74896 | 2.16425  |
| C | 3.052563 | 3.148523 | -1.74881 |
| H | 2.705459 | 4.015856 | -2.30173 |
| C | 4.364725 | 3.102075 | -1.27253 |
| H | 5.034607 | 3.937453 | -1.45399 |
| C | 5.79203  | -1.86    | 1.5776   |
| H | 6.76326  | -2.08272 | 2.009163 |
| C | 5.589564 | -0.63541 | 0.938648 |
| H | 6.401878 | 0.081988 | 0.88098  |
| C | 4.832936 | 1.989857 | -0.56969 |
| H | 5.857865 | 1.97185  | -0.21315 |
| C | -1.52967 | -0.98405 | 2.233689 |
| H | -2.33105 | -1.70284 | 2.371374 |
| C | -0.46634 | 1.113945 | 2.820525 |
| H | -0.44091 | 2.016706 | 3.423026 |
| C | -1.4788  | 0.170999 | 3.017017 |
| H | -2.24231 | 0.347146 | 3.768213 |
| O | 1.025323 | -1.60066 | -1.4906  |
| H | -1.16564 | 3.073547 | -0.1667  |
| H | 0.054585 | -0.5934  | -2.17717 |

---

## Hydrolysis of 10

## 10

 $E$  at B3LYP/SDD + 6-31G\*\* = -2920.24305198 Hartree

| Atom | X        | Y        | Z        |
|------|----------|----------|----------|
| Cl   | -5.58867 | -1.30241 | -0.09073 |
| Cl   | -2.88907 | -3.01045 | 0.120102 |
| Cl   | -2.52877 | 3.224429 | -0.68014 |
| Cl   | -5.40698 | 1.837775 | -0.49536 |
| O    | -0.2998  | 1.265624 | -0.45629 |
| O    | -0.45027 | -1.31852 | -0.13065 |
| C    | 2.246856 | -1.61889 | -1.08897 |
| C    | -1.61284 | -0.66006 | -0.20125 |
| C    | 2.474999 | 1.627116 | -0.52442 |
| C    | -1.53545 | 0.737475 | -0.38049 |
| C    | -3.95668 | 0.876119 | -0.38293 |
| C    | -2.69616 | 1.502163 | -0.46922 |
| C    | 1.571595 | -2.50009 | -1.94141 |
| H    | 0.501583 | -2.40386 | -2.08507 |
| C    | -4.03683 | -0.51466 | -0.20362 |
| C    | -2.85818 | -1.28152 | -0.11121 |
| C    | 3.621887 | -1.77638 | -0.86269 |
| H    | 4.156945 | -1.1062  | -0.19458 |
| C    | 1.446927 | -0.27185 | 2.04263  |
| C    | 2.385581 | 0.505607 | 2.733955 |
| H    | 2.993676 | 1.236231 | 2.208818 |
| C    | 2.195811 | 2.857782 | 0.091063 |
| H    | 1.350952 | 2.953007 | 0.765812 |
| C    | 3.534331 | 1.537087 | -1.43507 |
| H    | 3.748371 | 0.603462 | -1.94527 |
| C    | 0.659098 | -1.20812 | 2.726613 |
| H    | -0.06387 | -1.80896 | 2.184459 |
| C    | 2.277836 | -3.52259 | -2.5789  |
| H    | 1.753124 | -4.20406 | -3.24203 |
| C    | 2.987848 | 3.973647 | -0.18147 |
| H    | 2.766378 | 4.921978 | 0.299543 |
| C    | 4.053604 | 3.874175 | -1.07936 |
| H    | 4.666861 | 4.744789 | -1.29347 |

|    |          |          |          |
|----|----------|----------|----------|
| C  | 3.648007 | -3.67573 | -2.35851 |
| H  | 4.191502 | -4.47535 | -2.85342 |
| C  | 4.31945  | -2.80696 | -1.49581 |
| H  | 5.382915 | -2.93066 | -1.31322 |
| C  | 4.321983 | 2.658846 | -1.70956 |
| H  | 5.139818 | 2.581523 | -2.42033 |
| C  | 0.812987 | -1.35863 | 4.105656 |
| H  | 0.201614 | -2.08052 | 4.638975 |
| C  | 2.533499 | 0.345523 | 4.113139 |
| H  | 3.259098 | 0.948257 | 4.651465 |
| C  | 1.747357 | -0.58401 | 4.797246 |
| H  | 1.862464 | -0.70439 | 5.870624 |
| Sb | 1.220731 | -0.05661 | -0.05344 |

---

## H<sub>2</sub>O

$E$  at B3LYP/SDD + 6-31G\*\* = -76.4181679635 Hartree

| Atom | X | Y        | Z        |
|------|---|----------|----------|
| O    | 0 | 0        | 0.118882 |
| H    | 0 | 0.760245 | -0.47553 |
| H    | 0 | -0.76025 | -0.47553 |

---

## H<sub>2</sub>O-adduct in **10**

$E$  at B3LYP/SDD + 6-31G\*\* = -2996.68733415 Hartree

| Atom | X        | Y        | Z        |
|------|----------|----------|----------|
| Cl   | -5.53372 | -1.52992 | -0.27529 |
| Cl   | -2.75513 | -3.11871 | -0.27164 |
| Cl   | -2.69427 | 3.174966 | -0.37253 |
| Cl   | -5.50185 | 1.641395 | -0.32603 |
| O    | -0.3745  | 1.314637 | -0.37583 |
| O    | -0.40222 | -1.31192 | -0.33375 |
| C    | 2.472797 | -1.66851 | -0.60646 |
| C    | -1.59178 | -0.68947 | -0.32312 |
| C    | 2.446411 | 1.644511 | -0.58958 |
| C    | -1.5753  | 0.72496  | -0.34156 |

|   |          |          |          |
|---|----------|----------|----------|
| C | -4.0072  | 0.743116 | -0.32251 |
| C | -2.77813 | 1.432947 | -0.34155 |
| C | 2.001638 | -2.77307 | -1.32483 |
| H | 0.962471 | -2.81994 | -1.63041 |
| C | -4.02197 | -0.66095 | -0.30106 |
| C | -2.80624 | -1.37438 | -0.29949 |
| C | 3.803925 | -1.64128 | -0.16988 |
| H | 4.184734 | -0.79421 | 0.395898 |
| C | 1.171684 | -0.05342 | 2.050468 |
| C | 1.951601 | 0.836741 | 2.800277 |
| H | 2.586388 | 1.566591 | 2.305818 |
| C | 2.135682 | 2.914347 | -0.08086 |
| H | 1.260905 | 3.051784 | 0.546427 |
| C | 3.544368 | 1.486936 | -1.44342 |
| H | 3.777526 | 0.513817 | -1.86411 |
| C | 0.355099 | -0.98845 | 2.701872 |
| H | -0.24503 | -1.6837  | 2.122766 |
| C | 2.86282  | -3.83281 | -1.61735 |
| H | 2.49206  | -4.6888  | -2.17397 |
| C | 2.936574 | 4.010793 | -0.40678 |
| H | 2.693163 | 4.992357 | -0.01036 |
| C | 4.039519 | 3.847738 | -1.24814 |
| H | 4.659478 | 4.702734 | -1.50251 |
| C | 4.192319 | -3.79767 | -1.19153 |
| H | 4.8587   | -4.62423 | -1.42093 |
| C | 4.66239  | -2.70321 | -0.4639  |
| H | 5.693575 | -2.67465 | -0.12369 |
| C | 4.339416 | 2.588249 | -1.77039 |
| H | 5.188419 | 2.461743 | -2.43614 |
| C | 0.317319 | -1.02489 | 4.096729 |
| H | -0.3193  | -1.74705 | 4.599586 |
| C | 1.912363 | 0.792214 | 4.195717 |
| H | 2.51753  | 1.483561 | 4.775199 |
| C | 1.094253 | -0.13583 | 4.842898 |
| H | 1.062246 | -0.16645 | 5.928268 |
| O | 0.7575   | 0.055503 | -2.60126 |

|    |          |          |          |
|----|----------|----------|----------|
| H  | 0.068049 | -0.61104 | -2.73667 |
| H  | 0.291962 | 0.907061 | -2.59883 |
| Sb | 1.213884 | -0.02468 | -0.07039 |

---

### TS1 in **10**

$E$  at B3LYP/SDD + 6-31G\*\* = -2996.66367492 Hartree

Imaginary frequency: 800.0  $\text{icm}^{-1}$

| Atom | X        | Y        | Z        |
|------|----------|----------|----------|
| Sb   | 1.363893 | 0.064731 | -0.29013 |
| Cl   | -5.49597 | -1.4982  | -0.35621 |
| Cl   | -2.82022 | -3.15144 | -0.9286  |
| Cl   | -2.46855 | 3.079263 | -0.14789 |
| Cl   | -5.31513 | 1.6411   | 0.029276 |
| O    | -0.28087 | 1.219648 | -0.79937 |
| O    | -0.39691 | -1.43307 | -1.05402 |
| C    | 2.697398 | -1.62435 | -0.18922 |
| C    | -1.56472 | -0.76774 | -0.85738 |
| C    | 2.634264 | 1.745873 | -0.49692 |
| C    | -1.4769  | 0.633235 | -0.70124 |
| C    | -3.87918 | 0.712266 | -0.30819 |
| C    | -2.63635 | 1.361314 | -0.40451 |
| C    | 2.38163  | -2.85605 | -0.77929 |
| H    | 1.443413 | -2.98958 | -1.30765 |
| C    | -3.96039 | -0.68198 | -0.47464 |
| C    | -2.79119 | -1.41982 | -0.73843 |
| C    | 3.882216 | -1.50029 | 0.551282 |
| H    | 4.134131 | -0.56197 | 1.038777 |
| C    | 0.630873 | -0.01414 | 1.726918 |
| C    | -0.14764 | 1.03358  | 2.238518 |
| H    | -0.40078 | 1.885602 | 1.616895 |
| C    | 2.12032  | 3.025634 | -0.244   |
| H    | 1.078578 | 3.152288 | 0.030311 |
| C    | 3.966087 | 1.597901 | -0.90539 |
| H    | 4.372878 | 0.614647 | -1.1226  |
| C    | 0.914142 | -1.12478 | 2.530333 |

|   |          |          |          |
|---|----------|----------|----------|
| H | 1.500302 | -1.95182 | 2.141806 |
| C | 3.254923 | -3.93919 | -0.65077 |
| H | 3.000334 | -4.8915  | -1.10696 |
| C | 2.943864 | 4.14419  | -0.38139 |
| H | 2.542143 | 5.134272 | -0.18681 |
| C | 4.275021 | 3.993078 | -0.77547 |
| H | 4.912502 | 4.866125 | -0.88163 |
| C | 4.443321 | -3.80331 | 0.069182 |
| H | 5.12005  | -4.64721 | 0.166541 |
| C | 4.754716 | -2.5844  | 0.674269 |
| H | 5.672416 | -2.47637 | 1.245274 |
| C | 4.784677 | 2.72103  | -1.04155 |
| H | 5.816294 | 2.601402 | -1.35972 |
| C | 0.431361 | -1.18254 | 3.839885 |
| H | 0.649567 | -2.04938 | 4.457106 |
| C | -0.62554 | 0.972696 | 3.548262 |
| H | -1.23192 | 1.785586 | 3.93709  |
| C | -0.33626 | -0.13402 | 4.349412 |
| H | -0.71462 | -0.18218 | 5.366523 |
| O | 1.173102 | -0.36983 | -2.41274 |
| H | 1.891813 | -0.92762 | -2.7447  |
| H | 0.209454 | -1.04902 | -1.98458 |

---

### OH-adduct in **10**

$E$  at B3LYP/SDD + 6-31G\*\* = -2996.66386130 Hartree

| Atom | X        | Y        | Z        |
|------|----------|----------|----------|
| Sb   | 1.521998 | 0.066159 | -0.5572  |
| Cl   | -5.60091 | -1.25585 | 0.020609 |
| Cl   | -3.14775 | -3.14169 | -0.7805  |
| Cl   | -2.20867 | 3.042754 | -0.28847 |
| Cl   | -5.12038 | 1.875513 | 0.247698 |
| O    | -0.26725 | 1.028335 | -1.10344 |
| O    | -0.63481 | -1.6352  | -1.3166  |
| C    | 3.087733 | -1.40637 | -0.25295 |
| C    | -1.71052 | -0.86954 | -0.97227 |



|   |          |          |          |
|---|----------|----------|----------|
| C | 2.477422 | 1.915773 | -0.16163 |
| C | -1.46575 | 0.519729 | -0.87093 |
| C | -3.81719 | 0.81518  | -0.21678 |
| C | -2.54061 | 1.340871 | -0.47941 |
| C | 3.379929 | -2.38082 | -1.21605 |
| H | 2.823571 | -2.40343 | -2.1487  |
| C | -4.03631 | -0.56746 | -0.31285 |
| C | -2.96559 | -1.39837 | -0.68205 |
| C | 3.78452  | -1.42423 | 0.964995 |
| H | 3.549259 | -0.69909 | 1.740522 |
| C | 0.492251 | -0.46749 | 1.264008 |
| C | -0.21425 | 0.515796 | 1.966318 |
| H | -0.24964 | 1.536906 | 1.598028 |
| C | 1.727358 | 3.101042 | -0.15419 |
| H | 0.665736 | 3.072759 | -0.37298 |
| C | 3.855787 | 1.960844 | 0.089875 |
| H | 4.451323 | 1.052935 | 0.075237 |
| C | 0.502376 | -1.784   | 1.734516 |
| H | 1.048854 | -2.55382 | 1.197211 |
| C | 4.366976 | -3.34149 | -0.97658 |
| H | 4.581591 | -4.09557 | -1.72878 |
| C | 2.355852 | 4.316965 | 0.121535 |
| H | 1.771769 | 5.23277  | 0.128085 |
| C | 3.727014 | 4.358744 | 0.382206 |
| H | 4.211295 | 5.307405 | 0.595926 |
| C | 5.072101 | -3.33447 | 0.22774  |
| H | 5.84156  | -4.07863 | 0.412479 |
| C | 4.779598 | -2.3748  | 1.200312 |
| H | 5.319617 | -2.37182 | 2.143026 |
| C | 4.476948 | 3.18141  | 0.362996 |
| H | 5.545142 | 3.211055 | 0.55818  |
| C | -0.19361 | -2.11739 | 2.898678 |
| H | -0.18967 | -3.14348 | 3.255566 |
| C | -0.90258 | 0.18258  | 3.134452 |
| H | -1.45253 | 0.949106 | 3.67262  |
| C | -0.89609 | -1.13423 | 3.598629 |

|   |          |          |          |
|---|----------|----------|----------|
| H | -1.44072 | -1.39489 | 4.501515 |
| O | 1.590164 | -0.21456 | -2.51949 |
| H | 2.51277  | -0.35439 | -2.77802 |
| H | -0.856   | -2.57255 | -1.20902 |

---

## TS2 in 10

$E$  at B3LYP/SDD + 6-31G\*\* = -2996.66317872 Hartree

Imaginary frequency: 207.0  $\text{icm}^{-1}$

| Atom | X        | Y        | Z        |
|------|----------|----------|----------|
| Sb   | 1.502573 | 0.036262 | -0.52737 |
| Cl   | -5.59835 | -1.30184 | -0.06744 |
| Cl   | -3.09742 | -3.14139 | -0.83588 |
| Cl   | -2.25709 | 3.049134 | -0.23591 |
| Cl   | -5.16813 | 1.832688 | 0.21735  |
| O    | -0.27482 | 1.068522 | -1.0331  |
| O    | -0.59534 | -1.58639 | -1.29595 |
| C    | 3.061232 | -1.43298 | -0.22258 |
| C    | -1.69458 | -0.84406 | -0.96447 |
| C    | 2.500886 | 1.874659 | -0.18356 |
| C    | -1.47165 | 0.546455 | -0.83889 |
| C    | -3.83952 | 0.798129 | -0.2327  |
| C    | -2.56582 | 1.346843 | -0.45836 |
| C    | 3.530042 | -2.22564 | -1.27774 |
| H    | 3.080492 | -2.1191  | -2.25949 |
| C    | -4.03655 | -0.58643 | -0.35396 |
| C    | -2.94569 | -1.39731 | -0.70992 |
| C    | 3.635087 | -1.57542 | 1.049976 |
| H    | 3.271143 | -0.9818  | 1.884999 |
| C    | 0.466188 | -0.4346  | 1.309394 |
| C    | -0.1906  | 0.586868 | 2.005205 |
| H    | -0.18103 | 1.604109 | 1.625034 |
| C    | 1.795629 | 3.086304 | -0.24831 |
| H    | 0.738464 | 3.085854 | -0.49086 |
| C    | 3.870753 | 1.879445 | 0.116041 |
| H    | 4.427687 | 0.948306 | 0.167052 |

|   |          |          |          |
|---|----------|----------|----------|
| C | 0.412358 | -1.74675 | 1.788849 |
| H | 0.920464 | -2.54592 | 1.256414 |
| C | 4.56015  | -3.14558 | -1.06363 |
| H | 4.914106 | -3.76178 | -1.88565 |
| C | 2.461902 | 4.288911 | -0.00442 |
| H | 1.913376 | 5.225227 | -0.05328 |
| C | 3.825163 | 4.291089 | 0.29868  |
| H | 4.338396 | 5.22976  | 0.48766  |
| C | 5.134631 | -3.2731  | 0.202484 |
| H | 5.937926 | -3.98593 | 0.366553 |
| C | 4.673553 | -2.48526 | 1.260083 |
| H | 5.116708 | -2.58308 | 2.247242 |
| C | 4.529324 | 3.087033 | 0.357375 |
| H | 5.590292 | 3.085732 | 0.590504 |
| C | -0.2951  | -2.03772 | 2.957546 |
| H | -0.34076 | -3.06033 | 3.321379 |
| C | -0.89064 | 0.295802 | 3.177612 |
| H | -1.4021  | 1.091825 | 3.710926 |
| C | -0.94639 | -1.01628 | 3.65208  |
| H | -1.5006  | -1.24347 | 4.55818  |
| O | 1.569162 | -0.26628 | -2.49553 |
| H | 2.322402 | 0.226515 | -2.85317 |
| H | -0.79529 | -2.53076 | -1.20979 |

---

### OH-adduct isomer in **10**

$E$  at B3LYP/SDD + 6-31G\*\* = -2996.67843114 Hartree

| Atom | X        | Y        | Z        |
|------|----------|----------|----------|
| Cl   | -5.6527  | -0.85502 | 0.233314 |
| Cl   | -3.62058 | -2.87058 | -1.1843  |
| Cl   | -1.77917 | 3.011363 | -0.00241 |
| Cl   | -4.72158 | 2.127833 | 0.793159 |
| O    | -0.21537 | 0.87955  | -1.3186  |
| O    | -1.00485 | -1.6131  | -1.86461 |
| C    | 3.33444  | -1.28568 | -0.04131 |
| C    | -1.90694 | -0.78884 | -1.26616 |

|   |          |          |          |
|---|----------|----------|----------|
| C | 2.377398 | 1.871616 | -0.129   |
| C | -1.44907 | 0.527331 | -1.00367 |
| C | -3.6484  | 1.003485 | 0.000957 |
| C | -2.35443 | 1.406395 | -0.3742  |
| C | 4.213349 | -1.7086  | -1.04891 |
| H | 3.999437 | -1.46771 | -2.08491 |
| C | -4.06681 | -0.31242 | -0.24112 |
| C | -3.17945 | -1.19833 | -0.87508 |
| C | 3.610222 | -1.61938 | 1.292878 |
| H | 2.931353 | -1.31481 | 2.085867 |
| C | 0.34981  | -0.83884 | 1.030973 |
| C | -0.4001  | 0.038139 | 1.82229  |
| H | -0.30569 | 1.113152 | 1.69852  |
| C | 1.71765  | 3.017549 | -0.59197 |
| H | 0.79084  | 2.918841 | -1.14153 |
| C | 3.578954 | 1.988895 | 0.584315 |
| H | 4.107131 | 1.105935 | 0.930811 |
| C | 0.202157 | -2.22232 | 1.179096 |
| H | 0.789741 | -2.9062  | 0.572911 |
| C | 5.349843 | -2.45207 | -0.72269 |
| H | 6.023606 | -2.78061 | -1.50923 |
| C | 2.260632 | 4.276958 | -0.33061 |
| H | 1.749787 | 5.164948 | -0.69153 |
| C | 3.449724 | 4.396626 | 0.391457 |
| H | 3.86486  | 5.379617 | 0.595483 |
| C | 5.620679 | -2.7754  | 0.608954 |
| H | 6.506221 | -3.35289 | 0.859349 |
| C | 4.750095 | -2.35921 | 1.61786  |
| H | 4.95406  | -2.61302 | 2.654409 |
| C | 4.108034 | 3.253455 | 0.848743 |
| H | 5.035572 | 3.343067 | 1.406735 |
| C | -0.70996 | -2.72673 | 2.108008 |
| H | -0.8341  | -3.80033 | 2.215485 |
| C | -1.30471 | -0.47114 | 2.755765 |
| H | -1.89542 | 0.210785 | 3.359917 |
| C | -1.46593 | -1.85132 | 2.891454 |

|    |          |          |          |
|----|----------|----------|----------|
| H  | -2.18306 | -2.24542 | 3.605448 |
| O  | 1.724089 | -0.64974 | -2.37086 |
| H  | 0.867391 | -0.41863 | -2.76448 |
| H  | -1.38369 | -2.5018  | -1.93927 |
| Sb | 1.617379 | -0.07492 | -0.50482 |

---

### TS3 in **10**

$E$  at B3LYP/SDD + 6-31G\*\* = -2996.65705251 Hartree

Imaginary frequency: 920.4  $\text{icm}^{-1}$

| Atom | X        | Y        | Z        |
|------|----------|----------|----------|
| Cl   | -5.43215 | -0.79869 | 0.835212 |
| Cl   | -4.19274 | -2.62742 | -1.46779 |
| Cl   | -1.44141 | 2.843708 | -0.08897 |
| Cl   | -4.05895 | 1.987534 | 1.495111 |
| O    | -0.57628 | 0.881626 | -2.08851 |
| O    | -1.77228 | -1.43363 | -2.74843 |
| C    | 3.401492 | -1.57551 | 0.180563 |
| C    | -2.34907 | -0.67917 | -1.78034 |
| C    | 2.606634 | 1.659026 | -0.32058 |
| C    | -1.69089 | 0.544679 | -1.47668 |
| C    | -3.42178 | 0.968077 | 0.228813 |
| C    | -2.26763 | 1.353488 | -0.47483 |
| C    | 4.659949 | -1.47347 | -0.42913 |
| H    | 4.839897 | -0.73728 | -1.20783 |
| C    | -4.03771 | -0.25473 | -0.06266 |
| C    | -3.48857 | -1.06239 | -1.07418 |
| C    | 3.182308 | -2.52383 | 1.188122 |
| H    | 2.209696 | -2.60299 | 1.66668  |
| C    | 0.310598 | -0.48726 | 1.055434 |
| C    | 0.170531 | 0.481849 | 2.055211 |
| H    | 0.861101 | 1.318187 | 2.116047 |
| C    | 1.948959 | 2.69134  | -1.00449 |
| H    | 1.047868 | 2.484871 | -1.57454 |
| C    | 3.760993 | 1.91795  | 0.431464 |
| H    | 4.276754 | 1.115876 | 0.952768 |

|    |          |          |          |
|----|----------|----------|----------|
| C  | -0.61261 | -1.53669 | 0.946493 |
| H  | -0.53569 | -2.25919 | 0.138638 |
| C  | 5.693612 | -2.32202 | -0.03033 |
| H  | 6.66851  | -2.24396 | -0.50224 |
| C  | 2.458771 | 3.988795 | -0.92761 |
| H  | 1.95366  | 4.793373 | -1.45356 |
| C  | 3.607161 | 4.252995 | -0.17756 |
| H  | 3.996331 | 5.265612 | -0.1216  |
| C  | 5.473053 | -3.26999 | 0.97196  |
| H  | 6.279342 | -3.92938 | 1.279591 |
| C  | 4.220283 | -3.37144 | 1.580092 |
| H  | 4.050777 | -4.10776 | 2.360068 |
| C  | 4.258653 | 3.220565 | 0.501191 |
| H  | 5.152431 | 3.427181 | 1.082626 |
| C  | -1.67041 | -1.6198  | 1.852502 |
| H  | -2.403   | -2.41479 | 1.755871 |
| C  | -0.89295 | 0.392494 | 2.954819 |
| H  | -1.02059 | 1.154891 | 3.716713 |
| C  | -1.81007 | -0.65502 | 2.852457 |
| H  | -2.65263 | -0.70477 | 3.534943 |
| O  | 1.154877 | -0.78532 | -2.09407 |
| H  | 0.20705  | -0.01692 | -2.24301 |
| H  | -2.28409 | -2.24744 | -2.8638  |
| Sb | 1.822807 | -0.30047 | -0.40362 |

---

### Oxide product in **10**

$E$  at B3LYP/SDD + 6-31G\*\* = -2996.65832976 Hartree

| Atom | X        | Y        | Z        |
|------|----------|----------|----------|
| Cl   | -5.28336 | -0.88504 | 0.964113 |
| Cl   | -4.12216 | -2.65523 | -1.42081 |
| Cl   | -1.48539 | 2.896586 | -0.16067 |
| Cl   | -3.98582 | 1.948871 | 1.556859 |
| O    | -0.70051 | 1.012183 | -2.25296 |
| O    | -1.84518 | -1.34822 | -2.85293 |
| C    | 3.377974 | -1.58522 | 0.145655 |

|   |          |          |          |
|---|----------|----------|----------|
| C | -2.37795 | -0.63663 | -1.83389 |
| C | 2.58563  | 1.646331 | -0.29036 |
| C | -1.76076 | 0.605533 | -1.55257 |
| C | -3.38511 | 0.958847 | 0.25373  |
| C | -2.28662 | 1.388523 | -0.51281 |
| C | 4.648329 | -1.4692  | -0.43589 |
| H | 4.837683 | -0.72656 | -1.20642 |
| C | -3.96871 | -0.28601 | -0.01194 |
| C | -3.45529 | -1.07023 | -1.05807 |
| C | 3.148466 | -2.54142 | 1.143238 |
| H | 2.167561 | -2.63175 | 1.602531 |
| C | 0.311278 | -0.49037 | 1.026452 |
| C | 0.193139 | 0.480859 | 2.027677 |
| H | 0.882336 | 1.31984  | 2.065641 |
| C | 1.960551 | 2.699388 | -0.97322 |
| H | 1.091196 | 2.512524 | -1.59671 |
| C | 3.697239 | 1.890186 | 0.527702 |
| H | 4.190022 | 1.074264 | 1.04994  |
| C | -0.60688 | -1.5474  | 0.956983 |
| H | -0.54681 | -2.27822 | 0.15481  |
| C | 5.682202 | -2.30974 | -0.02041 |
| H | 6.666197 | -2.21905 | -0.47096 |
| C | 2.455463 | 3.997059 | -0.83039 |
| H | 1.972829 | 4.815539 | -1.35625 |
| C | 3.562274 | 4.243114 | -0.01452 |
| H | 3.941899 | 5.255232 | 0.092967 |
| C | 5.450281 | -3.26559 | 0.971681 |
| H | 6.256261 | -3.91905 | 1.292718 |
| C | 4.185882 | -3.38181 | 1.55248  |
| H | 4.007121 | -4.12377 | 2.325195 |
| C | 4.183638 | 3.192132 | 0.663795 |
| H | 5.045335 | 3.38415  | 1.296609 |
| C | -1.6336  | -1.6367  | 1.897855 |
| H | -2.35926 | -2.44146 | 1.832221 |
| C | -0.83996 | 0.388307 | 2.962225 |
| H | -0.9474  | 1.152389 | 3.725814 |

|    |          |          |          |
|----|----------|----------|----------|
| C  | -1.74979 | -0.66852 | 2.897612 |
| H  | -2.56693 | -0.72433 | 3.60997  |
| O  | 1.1116   | -0.70954 | -2.153   |
| H  | -0.01    | 0.232491 | -2.37823 |
| H  | -2.30378 | -2.19781 | -2.92679 |
| Sb | 1.799745 | -0.3121  | -0.47003 |

---

## Hydrolysis of 12

### 12

$E$  at B3LYP/SDD + 6-31G\*\* = -2919.04929810 Hartree

| Atom | X        | Y        | Z        |
|------|----------|----------|----------|
| Cl   | -2.48709 | 3.356931 | 0.080289 |
| Cl   | -5.39486 | 2.083492 | -0.30407 |
| Cl   | -5.67463 | -1.05396 | -0.66643 |
| Cl   | -3.04118 | -2.87171 | -0.63918 |
| O    | -0.32355 | 1.327932 | 0.024287 |
| O    | -0.55761 | -1.27915 | -0.28178 |
| C    | 2.638742 | 1.381616 | -0.05836 |
| C    | 2.761594 | 2.594165 | 0.616379 |
| C    | 3.871207 | 3.410375 | 0.375072 |
| C    | 4.842519 | 3.000771 | -0.54069 |
| C    | 4.713383 | 1.790952 | -1.22492 |
| C    | 3.604745 | 0.963925 | -0.99739 |
| C    | 3.369578 | -0.32688 | -1.71552 |
| C    | 4.222458 | -0.84888 | -2.69748 |
| C    | 3.905045 | -2.04534 | -3.344   |
| C    | 2.73552  | -2.74323 | -3.03287 |
| C    | 1.87279  | -2.24259 | -2.05373 |
| C    | 2.201591 | -1.05377 | -1.4081  |
| C    | 1.314663 | -0.865   | 2.095773 |
| C    | 0.472632 | -1.89545 | 2.53481  |
| C    | 0.611067 | -2.3839  | 3.834979 |
| C    | 1.58027  | -1.84921 | 4.68724  |
| C    | 2.41805  | -0.82282 | 4.245157 |



|    |          |          |          |
|----|----------|----------|----------|
| C  | 2.288095 | -0.32564 | 2.947302 |
| C  | -1.57218 | 0.830946 | -0.13039 |
| C  | -1.69171 | -0.56653 | -0.29526 |
| C  | -2.95412 | -1.13926 | -0.45601 |
| C  | -4.10378 | -0.32546 | -0.46208 |
| C  | -3.98035 | 1.064343 | -0.30074 |
| C  | -2.70492 | 1.641114 | -0.13219 |
| H  | 1.992963 | 2.912024 | 1.31509  |
| H  | 3.973152 | 4.359936 | 0.891868 |
| H  | 5.706648 | 3.630821 | -0.73052 |
| H  | 5.47979  | 1.50383  | -1.93744 |
| H  | 5.133185 | -0.32671 | -2.97151 |
| H  | 4.577187 | -2.43209 | -4.1046  |
| H  | 2.495473 | -3.66648 | -3.55125 |
| H  | 0.949438 | -2.75514 | -1.80312 |
| H  | -0.27818 | -2.30537 | 1.867322 |
| H  | -0.03962 | -3.18119 | 4.181656 |
| H  | 1.682373 | -2.23259 | 5.698379 |
| H  | 3.169982 | -0.40739 | 4.909517 |
| H  | 2.938811 | 0.474782 | 2.606737 |
| Sb | 1.116245 | -0.10159 | 0.132655 |

---

## H<sub>2</sub>O-adduct in **12**

$E$  at B3LYP/SDD + 6-31G\*\* = -2995.48687837 Hartree

| Atom | X        | Y        | Z        |
|------|----------|----------|----------|
| Cl   | -2.7627  | 3.204759 | -0.30662 |
| Cl   | -5.56127 | 1.686333 | -0.58139 |
| Cl   | -5.61315 | -1.48464 | -0.56913 |
| Cl   | -2.8582  | -3.08802 | -0.28219 |
| O    | -0.46754 | 1.34787  | -0.05134 |
| O    | -0.50762 | -1.30437 | -0.04078 |
| C    | 2.5041   | 1.393987 | -0.58918 |
| C    | 2.438417 | 2.784651 | -0.56077 |
| C    | 3.504552 | 3.532035 | -1.07021 |
| C    | 4.616777 | 2.874769 | -1.60184 |

|   |          |          |          |
|---|----------|----------|----------|
| C | 4.674248 | 1.480605 | -1.63881 |
| C | 3.613662 | 0.713974 | -1.13377 |
| C | 3.575596 | -0.78224 | -1.16478 |
| C | 4.596275 | -1.58077 | -1.7025  |
| C | 4.467705 | -2.97063 | -1.72324 |
| C | 3.324396 | -3.5905  | -1.21307 |
| C | 2.299433 | -2.81011 | -0.66874 |
| C | 2.430301 | -1.42421 | -0.64888 |
| C | 1.220936 | -0.04148 | 2.251536 |
| C | 0.436306 | -0.9505  | 2.973372 |
| C | 0.52749  | -0.98705 | 4.365872 |
| C | 1.397724 | -0.12264 | 5.034223 |
| C | 2.179875 | 0.78266  | 4.313629 |
| C | 2.092808 | 0.826729 | 2.920791 |
| C | -1.66152 | 0.750524 | -0.16774 |
| C | -1.68867 | -0.66434 | -0.15846 |
| C | -2.89934 | -1.34221 | -0.28823 |
| C | -4.10407 | -0.62338 | -0.41828 |
| C | -4.0795  | 0.780479 | -0.42388 |
| C | -2.85351 | 1.464336 | -0.30076 |
| H | 1.556392 | 3.277386 | -0.16275 |
| H | 3.465478 | 4.617129 | -1.05836 |
| H | 5.44713  | 3.452292 | -1.99791 |
| H | 5.548724 | 1.000239 | -2.06575 |
| H | 5.495009 | -1.12841 | -2.10925 |
| H | 5.267301 | -3.57341 | -2.14408 |
| H | 3.231944 | -4.67223 | -1.23954 |
| H | 1.399111 | -3.27451 | -0.27691 |
| H | -0.24105 | -1.61936 | 2.450671 |
| H | -0.08201 | -1.68868 | 4.927879 |
| H | 1.465211 | -0.15333 | 6.11793  |
| H | 2.85412  | 1.456208 | 4.83463  |
| H | 2.699337 | 1.536784 | 2.364493 |
| O | 0.433829 | -0.15628 | -2.44671 |
| H | 1.251198 | -0.27754 | -2.94855 |
| H | 0.015492 | -1.02937 | -2.42465 |

|    |          |          |          |
|----|----------|----------|----------|
| Sb | 1.074387 | 0.011715 | 0.143009 |
|----|----------|----------|----------|

---

### TS1 in 12

$E$  at B3LYP/SDD + 6-31G\*\* = -2995.46244206 Hartree

Imaginary frequency: 695.5  $\text{icm}^{-1}$

| Atom | X        | Y        | Z        |
|------|----------|----------|----------|
| Sb   | 1.210663 | 0.048298 | -0.25674 |
| Cl   | -5.64235 | -1.45041 | -0.41082 |
| Cl   | -2.96181 | -3.13452 | -0.83948 |
| Cl   | -2.59491 | 3.11212  | -0.24424 |
| Cl   | -5.45265 | 1.697682 | -0.12194 |
| O    | -0.39746 | 1.239208 | -0.74983 |
| O    | -0.52533 | -1.45488 | -0.9414  |
| C    | 2.823699 | -1.35006 | -0.25636 |
| C    | -1.69121 | -0.75847 | -0.79733 |
| C    | 2.738738 | 1.480413 | -0.40771 |
| C    | -1.59662 | 0.646936 | -0.68332 |
| C    | -4.01282 | 0.750921 | -0.37963 |
| C    | -2.76351 | 1.38946  | -0.45307 |
| C    | 2.786822 | -2.74208 | -0.21739 |
| H    | 1.831972 | -3.26048 | -0.18047 |
| C    | -4.09873 | -0.64757 | -0.50311 |
| C    | -2.92608 | -1.3989  | -0.70181 |
| C    | 4.047452 | -0.64545 | -0.32075 |
| C    | 0.512153 | -0.08405 | 1.762243 |
| C    | -0.3175  | 0.914926 | 2.289253 |
| H    | -0.62534 | 1.754471 | 1.674618 |
| C    | 2.607924 | 2.863531 | -0.49352 |
| H    | 1.620378 | 3.314918 | -0.51461 |
| C    | 4.002316 | 0.848719 | -0.39204 |
| C    | 0.899233 | -1.16614 | 2.561126 |
| H    | 1.544844 | -1.94333 | 2.163182 |
| C    | 3.982899 | -3.46685 | -0.22792 |
| H    | 3.96457  | -4.55218 | -0.19753 |
| C    | 3.75673  | 3.6564   | -0.56306 |

|   |          |          |          |
|---|----------|----------|----------|
| H | 3.671095 | 4.736414 | -0.63422 |
| C | 5.015201 | 3.050723 | -0.5422  |
| H | 5.910176 | 3.664035 | -0.59366 |
| C | 5.20026  | -2.7846  | -0.28016 |
| H | 6.132395 | -3.34204 | -0.28742 |
| C | 5.236439 | -1.39016 | -0.32775 |
| H | 6.198754 | -0.89069 | -0.3727  |
| C | 5.141837 | 1.663218 | -0.45797 |
| H | 6.134482 | 1.225203 | -0.44661 |
| C | 0.453425 | -1.25165 | 3.881981 |
| H | 0.751238 | -2.09484 | 4.498603 |
| C | -0.75878 | 0.824467 | 3.610371 |
| H | -1.40518 | 1.597784 | 4.015073 |
| C | -0.37634 | -0.25831 | 4.405234 |
| H | -0.72559 | -0.32824 | 5.431423 |
| O | 0.992838 | -0.40594 | -2.36372 |
| H | 1.741197 | -0.93023 | -2.68565 |
| H | 0.048754 | -1.13632 | -1.88689 |

---

### OH-adduct in **12**

$E$  at B3LYP/SDD + 6-31G\*\* = -2995.47343573 Hartree

| Atom | X        | Y        | Z        |
|------|----------|----------|----------|
| Sb   | 1.218455 | -0.22376 | -0.13002 |
| Cl   | -6.1161  | -0.00156 | -0.97708 |
| Cl   | -4.39414 | -2.68406 | -0.81868 |
| Cl   | -1.74202 | 2.759282 | 0.830988 |
| Cl   | -4.77165 | 2.747998 | -0.13299 |
| O    | -0.53254 | 0.084387 | 0.974796 |
| O    | -1.62285 | -2.23948 | 0.189648 |
| C    | 2.953698 | -0.02796 | -1.41241 |
| C    | -2.39317 | -1.12713 | 0.108323 |
| C    | 2.051932 | 1.507012 | 0.763107 |
| C    | -1.77954 | 0.084649 | 0.49921  |
| C    | -3.86802 | 1.259182 | -0.04414 |
| C    | -2.53306 | 1.266293 | 0.401595 |

|   |          |          |          |
|---|----------|----------|----------|
| C | 3.320194 | -0.80048 | -2.51537 |
| H | 2.713404 | -1.65307 | -2.81448 |
| C | -4.46588 | 0.048862 | -0.42091 |
| C | -3.71332 | -1.13517 | -0.34353 |
| C | 3.735537 | 1.079041 | -1.02302 |
| C | 1.636668 | -2.04073 | 0.882768 |
| C | 0.83398  | -2.46567 | 1.949025 |
| H | -0.04224 | -1.89198 | 2.221874 |
| C | 1.546825 | 2.190704 | 1.866024 |
| H | 0.604454 | 1.879858 | 2.300603 |
| C | 3.267694 | 1.874018 | 0.151715 |
| C | 2.769323 | -2.77795 | 0.514092 |
| H | 3.404298 | -2.44771 | -0.30186 |
| C | 4.475934 | -0.49117 | -3.24048 |
| H | 4.762871 | -1.09336 | -4.09765 |
| C | 2.255627 | 3.280927 | 2.37764  |
| H | 1.870391 | 3.827421 | 3.233188 |
| C | 3.458837 | 3.664352 | 1.781132 |
| H | 4.012427 | 4.511595 | 2.175864 |
| C | 5.256551 | 0.599672 | -2.8541  |
| H | 6.154499 | 0.848359 | -3.41239 |
| C | 4.891737 | 1.381194 | -1.75668 |
| H | 5.513387 | 2.228181 | -1.4848  |
| C | 3.963838 | 2.970256 | 0.680738 |
| H | 4.903651 | 3.289465 | 0.24229  |
| C | 3.088842 | -3.94993 | 1.203559 |
| H | 3.964218 | -4.52394 | 0.913784 |
| C | 1.164061 | -3.63471 | 2.635271 |
| H | 0.541946 | -3.96554 | 3.461916 |
| C | 2.286981 | -4.37781 | 2.262677 |
| H | 2.538153 | -5.28811 | 2.79982  |
| O | -0.00895 | -0.27107 | -1.67458 |
| H | 0.515234 | -0.14314 | -2.47814 |
| H | -2.10844 | -2.99028 | -0.18316 |

---

## TS2 in 12

 $E$  at B3LYP/SDD + 6-31G\*\* = -2995.46821210 HartreeImaginary frequency: 359.9  $\text{icm}^{-1}$ 

| Atom | X        | Y        | Z        |
|------|----------|----------|----------|
| Sb   | 1.263238 | 0.177835 | 0.155954 |
| Cl   | -6.12612 | 0.305866 | 1.014372 |
| Cl   | -4.09592 | 2.768198 | 1.063324 |
| Cl   | -2.0711  | -2.83549 | -0.90516 |
| Cl   | -5.08966 | -2.52329 | 0.014739 |
| O    | -0.53732 | -0.34414 | -0.82497 |
| O    | -1.37546 | 2.07345  | 0.10255  |
| C    | 3.11473  | 0.292126 | 1.272319 |
| C    | -2.26398 | 1.040671 | 0.090635 |
| C    | 2.084089 | -1.66138 | -0.47345 |
| C    | -1.77702 | -0.20709 | -0.36659 |
| C    | -4.01299 | -1.15256 | 0.048789 |
| C    | -2.67573 | -1.2917  | -0.36598 |
| C    | 3.54688  | 1.265117 | 2.172971 |
| H    | 2.936656 | 2.144612 | 2.368815 |
| C    | -4.47793 | 0.092904 | 0.492915 |
| C    | -3.58644 | 1.177649 | 0.51202  |
| C    | 3.901516 | -0.85197 | 1.029376 |
| C    | 1.513819 | 1.831297 | -1.16696 |
| C    | 0.604199 | 2.069043 | -2.20561 |
| H    | -0.26347 | 1.431448 | -2.31478 |
| C    | 1.514977 | -2.55338 | -1.3785  |
| H    | 0.527843 | -2.35381 | -1.7763  |
| C    | 3.365847 | -1.86912 | 0.076672 |
| C    | 2.642766 | 2.647352 | -1.02155 |
| H    | 3.362803 | 2.462336 | -0.23132 |
| C    | 4.773964 | 1.126924 | 2.828807 |
| H    | 5.110503 | 1.88765  | 3.527283 |
| C    | 2.224497 | -3.70091 | -1.74256 |
| H    | 1.790267 | -4.40966 | -2.44118 |
| C    | 3.491581 | -3.93023 | -1.20266 |
| H    | 4.046593 | -4.82073 | -1.48397 |

|   |          |          |          |
|---|----------|----------|----------|
| C | 5.560602 | -0.00016 | 2.583889 |
| H | 6.513473 | -0.11778 | 3.09183  |
| C | 5.129457 | -0.98435 | 1.694331 |
| H | 5.755193 | -1.85579 | 1.530756 |
| C | 4.060425 | -3.02569 | -0.30484 |
| H | 5.049813 | -3.22843 | 0.091524 |
| C | 2.853405 | 3.70804  | -1.90657 |
| H | 3.728025 | 4.341325 | -1.78921 |
| C | 0.82513  | 3.126269 | -3.08818 |
| H | 0.120829 | 3.307857 | -3.89496 |
| C | 1.945191 | 3.948302 | -2.93792 |
| H | 2.110974 | 4.771668 | -3.62695 |
| O | 0.142973 | 0.224637 | 1.777867 |
| H | 0.138364 | 1.109356 | 2.167209 |
| H | -1.84114 | 2.88585  | 0.352297 |

---

### OH-adduct isomer in **12**

$E$  at B3LYP/SDD + 6-31G\*\* = -2995.48067973 Hartree

| Atom | X        | Y        | Z        |
|------|----------|----------|----------|
| Cl   | -5.74573 | -0.12597 | 0.31727  |
| Cl   | -4.43126 | -2.0793  | -1.83716 |
| Cl   | -1.04102 | 2.681168 | 0.452744 |
| Cl   | -4.02419 | 2.278859 | 1.470943 |
| O    | -0.15672 | 0.613614 | -1.46134 |
| O    | -1.61915 | -1.37396 | -2.50625 |
| C    | 3.308494 | -1.28886 | 0.21972  |
| C    | -2.22467 | -0.53944 | -1.61127 |
| C    | 2.607541 | 1.289723 | -0.65938 |
| C    | -1.42173 | 0.505757 | -1.09217 |
| C    | -3.34576 | 1.200549 | 0.281422 |
| C    | -2.02518 | 1.379616 | -0.16321 |
| C    | 3.582732 | -2.58993 | 0.634652 |
| H    | 2.801389 | -3.3451  | 0.622542 |
| C    | -4.11153 | 0.139302 | -0.2233  |
| C    | -3.53727 | -0.71768 | -1.17699 |

|    |          |          |          |
|----|----------|----------|----------|
| C  | 4.314021 | -0.30271 | 0.222891 |
| C  | 0.139523 | -0.78293 | 1.212062 |
| C  | 0.122561 | 0.069225 | 2.320087 |
| H  | 0.821673 | 0.896685 | 2.3971   |
| C  | 2.176434 | 2.525538 | -1.13427 |
| H  | 1.145896 | 2.646656 | -1.44436 |
| C  | 3.938507 | 1.063746 | -0.25053 |
| C  | -0.78497 | -1.82998 | 1.109665 |
| H  | -0.77847 | -2.48391 | 0.241672 |
| C  | 4.870767 | -2.92867 | 1.060017 |
| H  | 5.091987 | -3.94283 | 1.379885 |
| C  | 3.088386 | 3.58242  | -1.20414 |
| H  | 2.769706 | 4.55202  | -1.57461 |
| C  | 4.408943 | 3.3836   | -0.79591 |
| H  | 5.119702 | 4.20367  | -0.8466  |
| C  | 5.872695 | -1.95578 | 1.070251 |
| H  | 6.874434 | -2.21323 | 1.402327 |
| C  | 5.601075 | -0.65116 | 0.656215 |
| H  | 6.398845 | 0.084463 | 0.673233 |
| C  | 4.833604 | 2.140116 | -0.32462 |
| H  | 5.867537 | 2.016233 | -0.02008 |
| C  | -1.73837 | -2.01159 | 2.11273  |
| H  | -2.46824 | -2.81086 | 2.024928 |
| C  | -0.82964 | -0.12256 | 3.323178 |
| H  | -0.85306 | 0.546548 | 4.177963 |
| C  | -1.76281 | -1.15554 | 3.215715 |
| H  | -2.51389 | -1.28918 | 3.988483 |
| O  | 1.112618 | -1.84381 | -1.75912 |
| H  | 0.303447 | -1.60635 | -2.24982 |
| H  | -2.2373  | -2.07664 | -2.75841 |
| Sb | 1.442739 | -0.4626  | -0.42906 |

---

TS3 in 12

$E$  at B3LYP/SDD + 6-31G\*\* = -2995.45234559 Hartree

Imaginary frequency: 970.4  $\text{icm}^{-1}$



| Atom | X        | Y        | Z        |
|------|----------|----------|----------|
| Cl   | -5.6691  | -0.23512 | 0.853088 |
| Cl   | -4.65193 | -2.40781 | -1.25196 |
| Cl   | -1.20061 | 2.736783 | -0.24397 |
| Cl   | -3.93405 | 2.382253 | 1.322321 |
| O    | -0.53918 | 0.473292 | -1.99956 |
| O    | -2.05514 | -1.68109 | -2.53444 |
| C    | 3.504112 | -1.38256 | 0.310024 |
| C    | -2.54035 | -0.77442 | -1.65101 |
| C    | 2.711238 | 1.179066 | -0.6021  |
| C    | -1.72033 | 0.362792 | -1.42025 |
| C    | -3.41613 | 1.175216 | 0.173187 |
| C    | -2.20488 | 1.334987 | -0.52207 |
| C    | 3.81682  | -2.66579 | 0.750646 |
| H    | 3.071453 | -3.45541 | 0.727187 |
| C    | -4.18968 | 0.026753 | -0.0334  |
| C    | -3.73946 | -0.93287 | -0.95685 |
| C    | 4.456865 | -0.33767 | 0.331352 |
| C    | 0.196683 | -0.54625 | 1.150791 |
| C    | 0.201961 | 0.480145 | 2.10083  |
| H    | 0.990594 | 1.227147 | 2.109195 |
| C    | 2.249306 | 2.376612 | -1.13968 |
| H    | 1.227681 | 2.449423 | -1.49649 |
| C    | 4.04393  | 1.008599 | -0.16734 |
| C    | -0.84531 | -1.48135 | 1.110769 |
| H    | -0.86916 | -2.24634 | 0.339835 |
| C    | 5.105723 | -2.93848 | 1.21722  |
| H    | 5.362399 | -3.93741 | 1.556025 |
| C    | 3.127216 | 3.461641 | -1.22147 |
| H    | 2.78672  | 4.404998 | -1.63705 |
| C    | 4.442629 | 3.324721 | -0.77278 |
| H    | 5.124572 | 4.167821 | -0.83499 |
| C    | 6.058638 | -1.91862 | 1.245458 |
| H    | 7.060264 | -2.12506 | 1.610919 |
| C    | 5.74111  | -0.63142 | 0.809925 |
| H    | 6.502433 | 0.140596 | 0.84699  |

|    |          |          |          |
|----|----------|----------|----------|
| C  | 4.903212 | 2.111964 | -0.25577 |
| H  | 5.936171 | 2.034126 | 0.066963 |
| C  | -1.88667 | -1.38747 | 2.034837 |
| H  | -2.71047 | -2.09289 | 1.992631 |
| C  | -0.84527 | 0.566122 | 3.019639 |
| H  | -0.86059 | 1.373291 | 3.745254 |
| C  | -1.88699 | -0.36323 | 2.983888 |
| H  | -2.71332 | -0.27568 | 3.682377 |
| O  | 0.896501 | -1.44781 | -1.88891 |
| H  | 0.047423 | -0.56077 | -2.13307 |
| H  | -2.66587 | -2.43031 | -2.59171 |
| Sb | 1.653583 | -0.6238  | -0.37504 |

---

### Oxide product in 12

$E$  at B3LYP/SDD + 6-31G\*\* = -2995.45430390 Hartree

| Atom | X        | Y        | Z        |
|------|----------|----------|----------|
| Cl   | -5.54741 | -0.34596 | 1.043479 |
| Cl   | -4.56489 | -2.54078 | -1.0526  |
| Cl   | -1.33093 | 2.803241 | -0.46464 |
| Cl   | -3.9402  | 2.378272 | 1.291195 |
| O    | -0.70018 | 0.553018 | -2.21877 |
| O    | -2.12108 | -1.70979 | -2.56303 |
| C    | 3.497657 | -1.40773 | 0.305614 |
| C    | -2.58443 | -0.81339 | -1.66295 |
| C    | 2.722914 | 1.162837 | -0.5912  |
| C    | -1.82839 | 0.372919 | -1.5224  |
| C    | -3.43587 | 1.157028 | 0.155268 |
| C    | -2.28238 | 1.351262 | -0.62577 |
| C    | 3.805144 | -2.69716 | 0.731256 |
| H    | 3.065377 | -3.49014 | 0.669212 |
| C    | -4.15444 | -0.03985 | 0.0419   |
| C    | -3.71983 | -1.01175 | -0.87424 |
| C    | 4.444239 | -0.35978 | 0.374006 |
| C    | 0.224208 | -0.46344 | 1.102613 |
| C    | 0.258067 | 0.625823 | 1.980053 |

|    |          |          |          |
|----|----------|----------|----------|
| H  | 1.049618 | 1.366832 | 1.911344 |
| C  | 2.270574 | 2.379314 | -1.09562 |
| H  | 1.260001 | 2.465512 | -1.4813  |
| C  | 4.039342 | 0.994775 | -0.10877 |
| C  | -0.82033 | -1.39444 | 1.165356 |
| H  | -0.86898 | -2.2141  | 0.453686 |
| C  | 5.080335 | -2.97268 | 1.232734 |
| H  | 5.331574 | -3.9764  | 1.561648 |
| C  | 3.137541 | 3.476015 | -1.10546 |
| H  | 2.800827 | 4.431727 | -1.49544 |
| C  | 4.438    | 3.334799 | -0.61636 |
| H  | 5.11278  | 4.185941 | -0.62246 |
| C  | 6.026927 | -1.94934 | 1.307705 |
| H  | 7.018458 | -2.15764 | 1.698896 |
| C  | 5.715629 | -0.65648 | 0.884981 |
| H  | 6.47233  | 0.117708 | 0.956932 |
| C  | 4.890254 | 2.108558 | -0.12545 |
| H  | 5.909777 | 2.029815 | 0.237521 |
| C  | -1.82924 | -1.2368  | 2.116397 |
| H  | -2.65187 | -1.94416 | 2.154752 |
| C  | -0.75787 | 0.779238 | 2.925455 |
| H  | -0.74833 | 1.634585 | 3.593987 |
| C  | -1.79811 | -0.14975 | 2.992772 |
| H  | -2.59867 | -0.0147  | 3.713414 |
| O  | 0.874764 | -1.42955 | -1.93875 |
| H  | -0.17708 | -0.33161 | -2.31092 |
| H  | -2.66076 | -2.51299 | -2.52919 |
| Sb | 1.661481 | -0.6559  | -0.44258 |

---

### Adducts of **1** and **4** with a solvent molecule

CHCl<sub>3</sub> molecule

*E* at B3LYP/6-31G\*\* = -1419.28272222 Hartree

| Atom | X        | Y        | Z        |
|------|----------|----------|----------|
| C    | 0.000858 | 0.001041 | 0.453391 |

|    |          |          |          |
|----|----------|----------|----------|
| H  | 0.000192 | -0.00014 | 1.540226 |
| Cl | 1.309729 | -1.09643 | -0.08355 |
| Cl | -1.60468 | -0.58605 | -0.08345 |
| Cl | 0.294632 | 1.682117 | -0.08362 |

---

**1** in the presence of one CHCl<sub>3</sub> molecule

*E* at B3LYP/6-31G\*\* = -6567.95487859 Hartree

BSSE-corrected *E* at B3LYP/6-31G\*\* = -6567.943433579302 Hartree

| Atom | X        | Y        | Z        |
|------|----------|----------|----------|
| As   | 1.489953 | 0.3143   | 0.103423 |
| Cl   | -5.04043 | -0.09551 | 1.785978 |
| Cl   | -2.2395  | -1.24325 | 2.835174 |
| Cl   | -2.32756 | 2.475681 | -2.25138 |
| Cl   | -5.08223 | 1.781013 | -0.77042 |
| O    | 0.015641 | 1.137668 | -0.92703 |
| O    | 0.047897 | -0.38823 | 1.100038 |
| C    | 2.599202 | -0.93055 | 1.146535 |
| C    | -1.16375 | 0.085479 | 0.750215 |
| C    | 2.464609 | 0.214496 | -1.60246 |
| C    | -1.16849 | 0.934437 | -0.37126 |
| C    | -3.57484 | 1.133521 | -0.17561 |
| C    | -2.37334 | 1.454021 | -0.83891 |
| C    | 2.234066 | -2.26254 | 1.359318 |
| H    | 1.2887   | -2.63396 | 0.98151  |
| C    | -3.55916 | 0.298216 | 0.953279 |
| C    | -2.33673 | -0.22761 | 1.421456 |
| C    | 3.815717 | -0.45554 | 1.648088 |
| H    | 4.109478 | 0.577992 | 1.491103 |
| C    | 1.868756 | 1.974499 | 0.986477 |
| C    | 2.548548 | 3.013211 | 0.347708 |
| H    | 2.890278 | 2.900228 | -0.67604 |
| C    | 2.181535 | 1.092726 | -2.6621  |
| H    | 1.378294 | 1.81115  | -2.57102 |
| C    | 3.465526 | -0.7527  | -1.76096 |
| H    | 3.685209 | -1.45608 | -0.96772 |

|    |          |          |          |
|----|----------|----------|----------|
| C  | 1.431328 | 2.120076 | 2.307325 |
| H  | 0.909276 | 1.303873 | 2.79664  |
| C  | 3.080291 | -3.11279 | 2.072541 |
| H  | 2.788915 | -4.14571 | 2.238813 |
| C  | 2.923108 | 1.025417 | -3.8404  |
| H  | 2.703631 | 1.71636  | -4.64874 |
| C  | 3.928689 | 0.067849 | -3.98825 |
| H  | 4.496798 | 0.012943 | -4.91219 |
| C  | 4.29244  | -2.63625 | 2.575616 |
| H  | 4.948246 | -3.29848 | 3.1332   |
| C  | 4.660084 | -1.30677 | 2.361896 |
| H  | 5.599867 | -0.92981 | 2.754688 |
| C  | 4.191649 | -0.82537 | -2.95081 |
| H  | 4.961496 | -1.58285 | -3.06262 |
| C  | 1.667049 | 3.315509 | 2.984154 |
| H  | 1.321852 | 3.432956 | 4.006805 |
| C  | 2.788468 | 4.20511  | 1.032464 |
| H  | 3.317683 | 5.013981 | 0.537838 |
| C  | 2.34505  | 4.357511 | 2.347406 |
| H  | 2.529111 | 5.287476 | 2.87705  |
| C  | -1.34521 | -2.95744 | -1.53398 |
| H  | -1.3743  | -3.80968 | -2.20801 |
| Cl | -2.78136 | -1.95145 | -1.85654 |
| Cl | 0.171559 | -2.05879 | -1.88285 |
| Cl | -1.34867 | -3.58506 | 0.140817 |

---

**4** in the presence of one CHCl<sub>3</sub> molecule

*E* at B3LYP/6-31G\*\* = -6566.76019398 Hartree

BSSE-corrected *E* at B3LYP/6-31G\*\* = -6566.749727222899 Hartree

| Atom | X        | Y        | Z        |
|------|----------|----------|----------|
| As   | -1.32559 | -0.49191 | 0.158229 |
| Cl   | 2.314114 | -1.90968 | -2.80586 |
| Cl   | 5.168482 | -1.30516 | -1.48233 |
| Cl   | 5.292603 | 0.069742 | 1.372804 |
| Cl   | 2.559568 | 0.822843 | 2.867011 |

|   |          |          |          |
|---|----------|----------|----------|
| O | 0.05291  | -1.02254 | -1.0468  |
| O | 0.152499 | 0.104713 | 1.225868 |
| C | -2.55977 | -0.44214 | -1.34054 |
| C | -2.46528 | -1.11377 | -2.55589 |
| C | -3.48119 | -0.96286 | -3.50345 |
| C | -4.57016 | -0.13152 | -3.23009 |
| C | -4.65162 | 0.561746 | -2.02163 |
| C | -3.63777 | 0.418525 | -1.069   |
| C | -3.5703  | 1.130757 | 0.231097 |
| C | -4.52026 | 2.038888 | 0.709481 |
| C | -4.31675 | 2.673203 | 1.935597 |
| C | -3.17199 | 2.410969 | 2.69224  |
| C | -2.22111 | 1.499971 | 2.226159 |
| C | -2.43191 | 0.862156 | 1.009046 |
| C | -1.65261 | -2.14843 | 1.072367 |
| C | -1.0509  | -2.38689 | 2.313946 |
| C | -1.28332 | -3.5874  | 2.983301 |
| C | -2.11728 | -4.55444 | 2.419396 |
| C | -2.71899 | -4.31927 | 1.182601 |
| C | -2.48764 | -3.11957 | 0.509968 |
| C | 1.28442  | -0.8401  | -0.55882 |
| C | 1.341445 | -0.216   | 0.70037  |
| C | 2.564139 | 0.062468 | 1.298057 |
| C | 3.755622 | -0.27581 | 0.624634 |
| C | 3.70003  | -0.88686 | -0.63891 |
| C | 2.45303  | -1.16879 | -1.23445 |
| H | -1.60457 | -1.73874 | -2.76453 |
| H | -3.41737 | -1.48276 | -4.45425 |
| H | -5.35776 | -0.01281 | -3.96832 |
| H | -5.49693 | 1.21561  | -1.83317 |
| H | -5.4117  | 2.260856 | 0.131608 |
| H | -5.05443 | 3.382261 | 2.299488 |
| H | -3.01671 | 2.91945  | 3.638765 |
| H | -1.32003 | 1.30291  | 2.794449 |
| H | -0.39902 | -1.63984 | 2.752397 |
| H | -0.81051 | -3.76649 | 3.944151 |

|    |          |          |          |
|----|----------|----------|----------|
| H  | -2.29622 | -5.48949 | 2.941887 |
| H  | -3.3663  | -5.06893 | 0.737745 |
| H  | -2.95648 | -2.9493  | -0.45331 |
| C  | 0.817695 | 3.195184 | -0.9799  |
| H  | 0.741447 | 4.178091 | -1.43747 |
| Cl | 0.589974 | 3.386082 | 0.77887  |
| Cl | -0.48443 | 2.18126  | -1.69309 |
| Cl | 2.431596 | 2.535203 | -1.369   |

---

### THF molecule

$E$  at B3LYP/6-31G\*\* = -232.467547330 Hartree

| Atom | X        | Y        | Z        |
|------|----------|----------|----------|
| O    | 0.00002  | -1.25248 | 0        |
| C    | -1.16473 | -0.42933 | 0.134257 |
| H    | -1.52956 | -0.47381 | 1.172271 |
| H    | -1.95328 | -0.82159 | -0.51831 |
| C    | 1.164743 | -0.42929 | -0.13426 |
| H    | 1.529585 | -0.4738  | -1.17227 |
| H    | 1.953307 | -0.8215  | 0.518333 |
| C    | -0.73198 | 0.995568 | -0.23185 |
| H    | -0.78613 | 1.14458  | -1.3163  |
| H    | -1.34525 | 1.76307  | 0.248347 |
| C    | 0.731945 | 0.995592 | 0.231838 |
| H    | 0.786063 | 1.144552 | 1.316306 |
| H    | 1.345209 | 1.763134 | -0.24831 |

---

### 1 in the presence of one THF molecule

$E$  at B3LYP/6-31G\*\* = -5381.15409596 Hartree

BSSE-corrected  $E$  at B3LYP/6-31G\*\* = -5381.130466199838 Hartree

| Atom | X        | Y        | Z        |
|------|----------|----------|----------|
| As   | 1.114611 | -0.16564 | 0.227586 |
| Cl   | -5.41578 | -1.22806 | -1.03197 |
| Cl   | -2.62878 | -2.65516 | -1.719   |
| Cl   | -2.58734 | 2.90379  | 1.249566 |

|    |          |          |          |
|----|----------|----------|----------|
| Cl | -5.39491 | 1.572642 | 0.460291 |
| O  | -0.26716 | 1.21488  | 0.394345 |
| O  | -0.27789 | -1.0268  | -0.8158  |
| C  | 2.270255 | -1.60029 | -0.48772 |
| C  | -1.48488 | -0.51565 | -0.54812 |
| C  | 2.44093  | 1.224198 | 0.709732 |
| C  | -1.47522 | 0.720438 | 0.131268 |
| C  | -3.89714 | 0.764053 | 0.074966 |
| C  | -2.67107 | 1.362266 | 0.433679 |
| C  | 2.324703 | -1.91965 | -1.84668 |
| H  | 1.72282  | -1.35922 | -2.55016 |
| C  | -3.90621 | -0.47261 | -0.58882 |
| C  | -2.689   | -1.11679 | -0.89689 |
| C  | 3.004992 | -2.36751 | 0.424591 |
| H  | 2.940256 | -2.16743 | 1.489384 |
| C  | 0.616727 | -0.93161 | 1.933934 |
| C  | 0.787307 | -0.21301 | 3.118887 |
| H  | 1.232241 | 0.7766   | 3.100005 |
| C  | 2.085221 | 2.572052 | 0.860552 |
| H  | 1.055398 | 2.875522 | 0.737315 |
| C  | 3.781933 | 0.856401 | 0.874205 |
| H  | 4.095935 | -0.17123 | 0.742059 |
| C  | 0.021211 | -2.19718 | 1.957721 |
| H  | -0.12352 | -2.73907 | 1.028893 |
| C  | 3.1352   | -2.96389 | -2.29263 |
| H  | 3.166491 | -3.20502 | -3.35127 |
| C  | 3.054089 | 3.525032 | 1.177947 |
| H  | 2.760935 | 4.564666 | 1.292285 |
| C  | 4.387485 | 3.150633 | 1.348935 |
| H  | 5.138712 | 3.895212 | 1.595363 |
| C  | 3.892575 | -3.7045  | -1.38334 |
| H  | 4.523613 | -4.51665 | -1.7322  |
| C  | 3.823136 | -3.40702 | -0.02256 |
| H  | 4.393543 | -3.98933 | 0.69517  |
| C  | 4.747049 | 1.81199  | 1.199676 |
| H  | 5.781118 | 1.505261 | 1.327145 |



|   |          |          |          |
|---|----------|----------|----------|
| C | -0.3833  | -2.75149 | 3.170958 |
| H | -0.84697 | -3.73328 | 3.189057 |
| C | 0.383179 | -0.77082 | 4.332235 |
| H | 0.518071 | -0.21399 | 5.254803 |
| C | -0.2008  | -2.03899 | 4.35843  |
| H | -0.51835 | -2.47002 | 5.303448 |
| O | 1.411085 | 0.89054  | -1.94336 |
| C | 0.28608  | 1.59209  | -2.52215 |
| H | -0.08502 | 2.322    | -1.79636 |
| H | -0.49588 | 0.856526 | -2.71652 |
| C | 2.658158 | 1.394289 | -2.47862 |
| H | 3.107252 | 0.599668 | -3.08621 |
| H | 3.331422 | 1.627282 | -1.65296 |
| C | 0.848374 | 2.264544 | -3.7698  |
| H | 0.87733  | 1.558928 | -4.60741 |
| H | 0.260544 | 3.134388 | -4.07351 |
| C | 2.273176 | 2.616197 | -3.31368 |
| H | 2.257107 | 3.511082 | -2.68211 |
| H | 2.967111 | 2.791549 | -4.13953 |

---

**4** in the presence of one THF molecule

$E$  at B3LYP/6-31G\*\* = -5379.96542897 Hartree

BSSE-corrected  $E$  at B3LYP/6-31G\*\* = -5379.943236192341 Hartree

| Atom | X        | Y        | Z        |
|------|----------|----------|----------|
| As   | 1.18874  | 0.294969 | 0.223599 |
| Cl   | -2.60032 | 2.162255 | -2.26758 |
| Cl   | -5.37909 | 1.045608 | -1.1222  |
| Cl   | -5.34383 | -0.93091 | 1.36075  |
| Cl   | -2.53478 | -1.74748 | 2.668452 |
| O    | -0.26142 | 1.198872 | -0.67796 |
| O    | -0.23469 | -0.3717  | 1.339372 |
| C    | 2.330122 | 0.525634 | -1.33292 |
| C    | 2.196141 | 1.445104 | -2.36469 |
| C    | 3.156837 | 1.476034 | -3.37973 |
| C    | 4.236792 | 0.590648 | -3.34456 |

|   |          |          |          |
|---|----------|----------|----------|
| C | 4.36773  | -0.331   | -2.30445 |
| C | 3.407712 | -0.37506 | -1.28787 |
| C | 3.413793 | -1.30789 | -0.13426 |
| C | 4.36135  | -2.31123 | 0.095315 |
| C | 4.237187 | -3.14304 | 1.209404 |
| C | 3.174316 | -2.98468 | 2.102171 |
| C | 2.224306 | -1.98299 | 1.882167 |
| C | 2.356809 | -1.14871 | 0.779001 |
| C | 1.691107 | 1.779292 | 1.355906 |
| C | 2.722975 | 1.638716 | 2.29085  |
| C | 3.105781 | 2.715162 | 3.091362 |
| C | 2.459178 | 3.944674 | 2.965646 |
| C | 1.430329 | 4.093035 | 2.03459  |
| C | 1.049975 | 3.017829 | 1.232388 |
| C | -1.46012 | 0.799421 | -0.2436  |
| C | -1.44266 | -0.06866 | 0.867384 |
| C | -2.63012 | -0.61943 | 1.340358 |
| C | -3.85571 | -0.26954 | 0.7359   |
| C | -3.87182 | 0.603732 | -0.36381 |
| C | -2.66076 | 1.125824 | -0.86456 |
| H | 1.347521 | 2.119663 | -2.38645 |
| H | 3.061996 | 2.186265 | -4.19557 |
| H | 4.983188 | 0.616654 | -4.13302 |
| H | 5.214914 | -1.00966 | -2.29343 |
| H | 5.189675 | -2.45413 | -0.59139 |
| H | 4.973691 | -3.92306 | 1.378802 |
| H | 3.081578 | -3.64226 | 2.96111  |
| H | 1.385634 | -1.85914 | 2.558139 |
| H | 3.231184 | 0.687701 | 2.408501 |
| H | 3.906499 | 2.589501 | 3.814192 |
| H | 2.754654 | 4.782559 | 3.590337 |
| H | 0.921643 | 5.046892 | 1.930453 |
| H | 0.252925 | 3.145327 | 0.509609 |
| O | 0.368043 | -1.53179 | -1.20113 |
| C | -0.10439 | -2.78055 | -0.63252 |
| H | 0.759877 | -3.43144 | -0.47072 |

|   |          |          |          |
|---|----------|----------|----------|
| H | -0.55722 | -2.55884 | 0.335772 |
| C | -0.2631  | -1.29409 | -2.47702 |
| H | -0.38983 | -0.21823 | -2.59077 |
| H | 0.395031 | -1.66432 | -3.27495 |
| C | -1.56324 | -2.08797 | -2.40877 |
| H | -2.31155 | -1.53237 | -1.83553 |
| H | -1.97791 | -2.30994 | -3.39533 |
| C | -1.11583 | -3.34312 | -1.64083 |
| H | -1.94021 | -3.8626  | -1.14611 |
| H | -0.62921 | -4.04963 | -2.321   |

---

### Reference

- [1] K.Hirose, *J. Incl. Phenom. Macrocycl. Chem.* 2001, **39**, 193.
